# Supplementary material
Source: PubMed Central journal article supplement (PMC4131180)

# **Unnatural amino acids increase sensitivity and provide for the design of highly selective caspase substrates**

Marcin Poreba<sup>1</sup>, Paulina Kasperkiewicz<sup>1</sup>, Scott J. Snipas<sup>2</sup>, Domenico Fasci<sup>2</sup>, Guy S. Salvesen<sup>2,\*</sup>, Marcin Drag<sup>1,2,\*</sup>

<sup>1</sup>Division of Bioorganic Chemistry, Faculty of Chemistry, Wrocław University of Technology, Wybrzeże Wyspińskiego 27, 50-370 Wrocław, Poland; <sup>2</sup>Sanford-Burnham Medical Research Institute, 10901 North Torrey Pines Road, La Jolla, CA 92037, USA

## **Supplemental section**















| substrate | enzyme  | $k_{\text{cat}}, \text{s}^{-1}$ | $K_{\text{M}}, \mu\text{M}$ | $k_{\text{cat}}/K_{\text{M}}, \text{M}^{-1}\text{s}^{-1}$ |
|-----------|---------|---------------------------------|-----------------------------|-----------------------------------------------------------|
| MPP41     | Casp-3  | 30.1                            | 28.2                        | 1,050,000                                                 |
| MPP42     | Casp-3  | 27.8                            | 33.5                        | 825,000                                                   |
| MPP48     | Casp-6  | 4.08                            | 23.0                        | 186,300                                                   |
| MPP49     | Casp-6  | 2.94                            | 12.6                        | 229,000                                                   |
| MPP41     | Casp-7  | 6.88                            | 41.6                        | 167,000                                                   |
| MPP42     | Casp-7  | 9.66                            | 61.5                        | 159,000                                                   |
| MPP45     | Casp-8  | 0.361                           | 1.04                        | 349,000                                                   |
| MPP46     | Casp-8  | 0.717                           | 1.31                        | 525,300                                                   |
| MPP47     | Casp-9  | 1.18                            | 32.1                        | 37,000                                                    |
| MPP43     | Casp-10 | 1.59                            | 9.11                        | 176,200                                                   |

**Supplementary Table 1. Kinetic analysis of the best caspases substrates containing unnatural amino acids.**

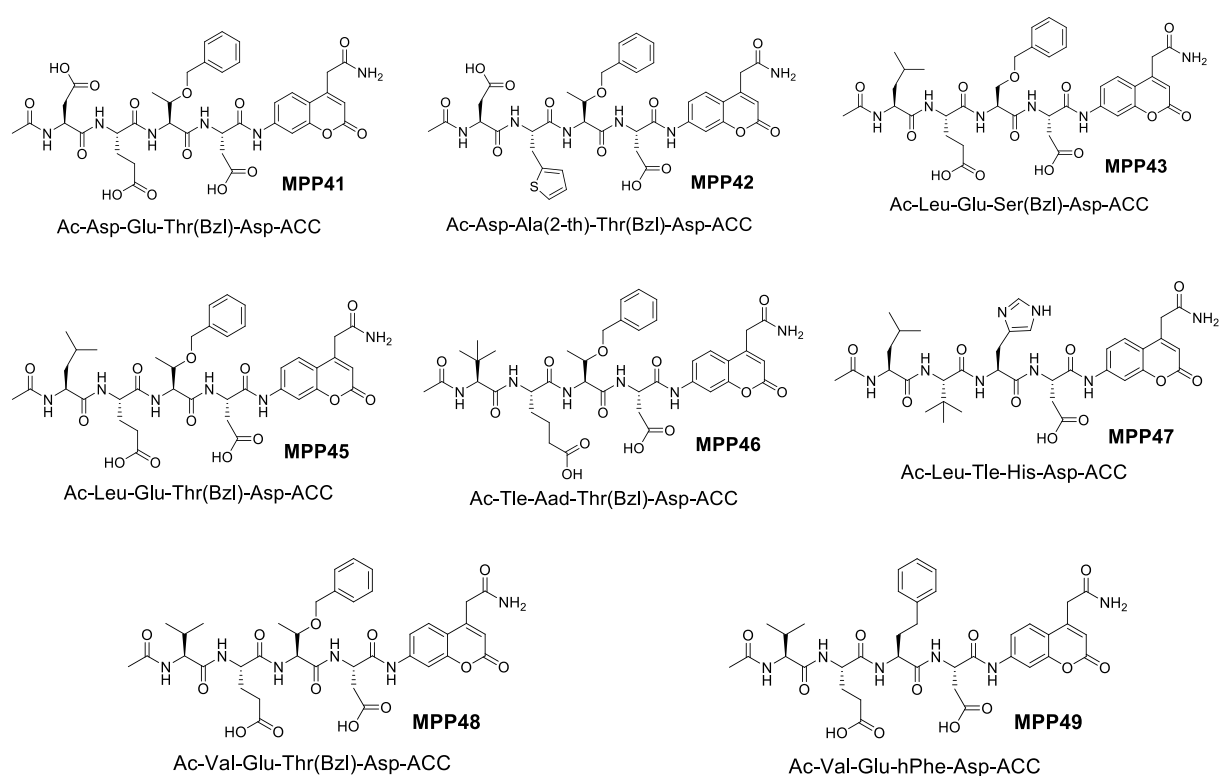

**Supplementary Figure 7. The structures of the best short peptide caspases substrates**

| sequence     | enzyme   |                                                  | Casp-3  | Casp-6 | Cas-7  | Casp-8  | Casp-9  | Casp-10 |
|--------------|----------|--------------------------------------------------|---------|--------|--------|---------|---------|---------|
| <b>DEVD</b>  | Casp-3/7 | $K_M, \mu\text{M}$                               | 20.7    | 473    | 49.6   | 6.94    | 104     | 24.3    |
|              |          | $k_{\text{cat}}, \text{s}^{-1}$                  | 10.0    | 0.642  | 3.92   | 0.496   | 0.033   | 0.867   |
|              |          | $k_{\text{cat}}/K_M, \text{M}^{-1}\text{s}^{-1}$ | 474,400 | 1,360  | 82,000 | 71,600  | 310     | 34,600  |
| <b>VEID</b>  | Casp-6   | $K_M, \mu\text{M}$                               | 218     | 45.6   | 285    | 2.12    | 25.6    | 20.9    |
|              |          | $k_{\text{cat}}, \text{s}^{-1}$                  | 3.26    | 2.02   | 0.553  | 0.300   | 0.078   | 1.25    |
|              |          | $k_{\text{cat}}/K_M, \text{M}^{-1}\text{s}^{-1}$ | 14,700  | 44,800 | 1,870  | 14,100  | 3,300   | 58,400  |
| <b>IETD</b>  | Casp-8   | $K_M, \mu\text{M}$                               | 156     | 141    | 401    | 6.43    | 59.0    | 20.2    |
|              |          | $k_{\text{cat}}, \text{s}^{-1}$                  | 0.962   | 1.72   | 0.121  | 0.607   | 0.144   | 1.76    |
|              |          | $k_{\text{cat}}/K_M, \text{M}^{-1}\text{s}^{-1}$ | 6,120   | 12,200 | 300    | 94,900  | 2,450   | 88,200  |
| <b>LEHD</b>  | Casp-9   | $K_M, \mu\text{M}$                               | 163     | 209    | 419    | 13.7    | 102     | 26.3    |
|              |          | $k_{\text{cat}}, \text{s}^{-1}$                  | 1.61    | 2.83   | 0.305  | 2.54    | 1.35    | 3.87    |
|              |          | $k_{\text{cat}}/K_M, \text{M}^{-1}\text{s}^{-1}$ | 9,670   | 13,600 | 730    | 186,000 | 12,700  | 143,700 |
| <b>AEVD</b>  | Casp-10  | $K_M, \mu\text{M}$                               | 126     | n.d.   | 143    | 8.59    | 57.8    | 33.1    |
|              |          | $k_{\text{cat}}, \text{s}^{-1}$                  | 4.04    | n.d.   | 2.64   | 0.686   | 0.136   | 0.510   |
|              |          | $k_{\text{cat}}/K_M, \text{M}^{-1}\text{s}^{-1}$ | 32,900  | 1,100  | 18,500 | 80,200  | 2,300   | 15,700  |
| <b>VDVAD</b> | Casp-2   | $K_M, \mu\text{M}$                               | 30.2    | n.d.   | 98.5   | 48.5    | 110     | 27.9    |
|              |          | $k_{\text{cat}}, \text{s}^{-1}$                  | 3.46    | n.d.   | 1.47   | 0.868   | 0.00941 | 0.710   |
|              |          | $k_{\text{cat}}/K_M, \text{M}^{-1}\text{s}^{-1}$ | 115,000 | 100    | 14,900 | 17,900  | 80      | 25,600  |

**Supplementary Table 2. Kinetic analysis of caspases fluorogenic substrates (Ac-P4-P3-P2-Asp-ACC) with reference tetrapeptide sequences and a caspase 2 reference substrate (Ac-VDVAD-ACC).**  $K_M$  values for Ac-AEVD-ACC and Ac-VDVAD-ACC substrates for caspase 6 were above 500  $\mu\text{M}$ , so we calculated only  $k_{\text{cat}}/K_M$  parameter (see Equation 2 in Supplementary Figure 12), n.d. not determined.

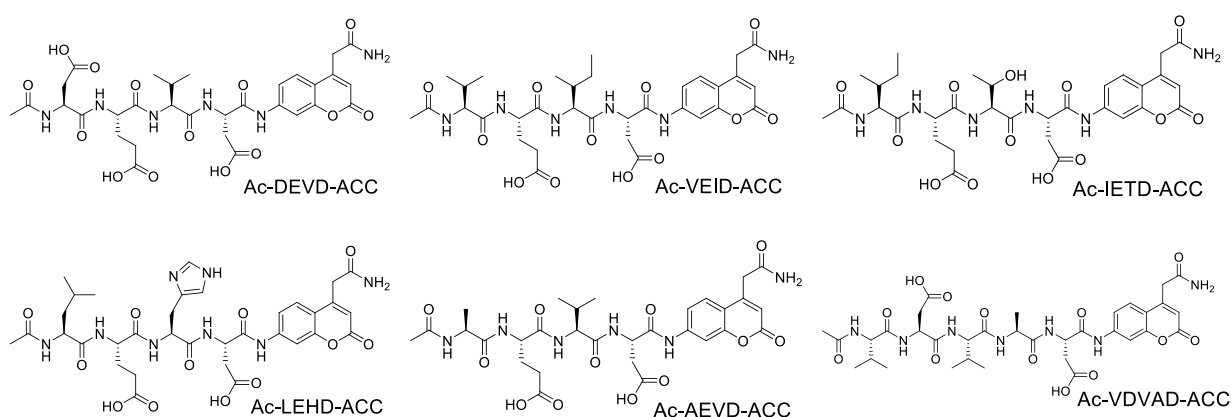

**Supplementary Figure 8. Reference structures of generally used peptidyl caspase-targeting sequences.**

| substrate | enzyme   | Casp-3         | Casp-6        | Casp-7        | Casp-8         | Casp-9        | Casp-10       |
|-----------|----------|----------------|---------------|---------------|----------------|---------------|---------------|
| MPP38     | Casp-3/7 | <b>318,200</b> | 96            | <b>71,600</b> | 2,654          | 27            | 2,020         |
| MPP39     |          | <b>181,000</b> | 36            | <b>40,500</b> | 1,500          | 16            | 300           |
| MPP40     |          | <b>238,000</b> | 39            | <b>38,000</b> | 1,430          | 7             | 1,560         |
| MPP36     | Casp-6   | 1,343          | <b>26,600</b> | 560           | 590            | 0             | 5,800         |
| MPP28     | Casp-8   | 520            | 110           | 200           | <b>53,400</b>  | 600           | 7,800         |
| MPP30     |          | 2,100          | 140           | 920           | <b>137,500</b> | 1,880         | 2,600         |
| MPP8      | Casp-9   | 0              | 30            | 0             | 2,600          | <b>32,200</b> | 960           |
| MPP10     |          | 360            | 350           | 45            | 1,400          | <b>27,500</b> | 3,200         |
| MPP12     |          | 0              | 0             | 0             | 1,580          | <b>31,500</b> | 1,120         |
| MPP17     | Casp-10  | 3,650          | 4,300         | 950           | 5,400          | 400           | <b>48,600</b> |
| MPP21     |          | 40             | 300           | 74            | 380            | 490           | <b>12,600</b> |
| MPP50     |          | 580            | 1,600         | 34            | 11,100         | 1,090         | <b>59,800</b> |
| MPP51     |          | 120            | 25            | 0             | 10,800         | 590           | <b>62,400</b> |
| MPP52     |          | 70             | 20            | 36            | 130            | 320           | <b>10,300</b> |
| MPP53     |          | 50             | 86            | 51            | 20             | 160           | <b>5,800</b>  |

**Supplementary Table 3. Kinetic analysis of the most specific substrates tested toward six human recombinant caspases.** Values are  $k_{cat}/K_M$  with units of  $M^{-1}s^{-1}$ .

| substrate | enzyme     | $k_{\text{cat}}, \text{s}^{-1}$ | $K_{\text{M}}, \mu\text{M}$ | $k_{\text{cat}}/K_{\text{M}}, \text{M}^{-1}\text{s}^{-1}$ |
|-----------|------------|---------------------------------|-----------------------------|-----------------------------------------------------------|
| MPP38     | Caspase-3  | 8.34                            | 26.2                        | 318,000                                                   |
| MPP39     |            | 6.44                            | 35.6                        | 181,000                                                   |
| MPP40     |            | 8.03                            | 33.8                        | 238,000                                                   |
| MPP36     | Caspase-6  | 1.63                            | 59.6                        | 26,600                                                    |
| MPP38     | Caspase-7  | 2.11                            | 29.4                        | 71,600                                                    |
| MPP39     |            | 2.01                            | 51.8                        | 40,500                                                    |
| MPP40     |            | 2.37                            | 64.3                        | 38,000                                                    |
| MPP28     | Caspase-8  | 0.536                           | 10.1                        | 53,400                                                    |
| MPP30     |            | 0.222                           | 1.59                        | 137,000                                                   |
| MPP8      | Caspase-9  | 2.07                            | 68.6                        | 32,200                                                    |
| MPP10     |            | 0.348                           | 13.1                        | 27,500                                                    |
| MPP12     |            | 0.642                           | 21.1                        | 31,500                                                    |
| MPP17     | Caspase-10 | 1.07                            | 22.6                        | 48,600                                                    |
| MPP21     |            | 0.102                           | 7.64                        | 12,600                                                    |
| MPP50     |            | 0.204                           | 3.55                        | 59,800                                                    |
| MPP51     |            | 0.863                           | 13.9                        | 62,400                                                    |
| MPP52     |            | 0.121                           | 12.1                        | 10,300                                                    |
| MPP53     |            | 0.072                           | 12.7                        | 5,800                                                     |

**Supplementary Table 4. Detailed kinetic analysis of the most selective caspases substrates.**

| substrate/enzyme                            | Casp-3      | Casp-6     | Casp-7     | Casp-8    | Casp-9     | Casp-10    |
|---------------------------------------------|-------------|------------|------------|-----------|------------|------------|
| Commercial substrates                       |             |            |            |           |            |            |
| DEVD                                        | <b>1415</b> | 79         | <b>470</b> | 62        | 2          | 120        |
| VEID                                        | 172         | <b>371</b> | 16         | 36        | 12         | 188        |
| IETD                                        | 60          | 101        | 3          | <b>78</b> | 19         | 326        |
| LEHD                                        | 92          | 307        | 6          | 614       | <b>103</b> | 618        |
| AEVD                                        | 394         | 56         | 134        | 68        | 17         | <b>83</b>  |
| VDVAD                                       | 542         | 0          | 90         | 71        | 1          | 125        |
| Substrates containing unnatural amino acids |             |            |            |           |            |            |
| MPP39                                       | <b>872</b>  | 0          | <b>305</b> | 11        | 0          | 3          |
| MPP36                                       | 14          | <b>345</b> | 3          | 5         | 0          | 36         |
| MPP28                                       | 3           | 0          | 0          | <b>94</b> | 5          | 120        |
| MPP30                                       | 34          | 1          | 7          | <b>72</b> | 0          | 3          |
| MPP8                                        | 0           | 0          | 0          | 23        | <b>256</b> | 20         |
| MPP10                                       | 0           | 0          | 0          | 22        | <b>145</b> | 25         |
| MPP52                                       | 0           | 0          | 0          | 0         | 0          | <b>47</b>  |
| MPP23                                       | 0           | 0          | 0          | 3         | 1          | <b>26</b>  |
| MPP50                                       | 6           | 7          | 0          | 21        | 2          | <b>154</b> |

**Supplementary Table 5. Selectivity of individual substrates.** In this experiment we compared substrates with previously reported sequences with our most selective substrates toward six recombinant caspases. Each substrate concentration was held at 100  $\mu$ M, and all caspases were used in the final concentration of 50 nM. Results are presented as the initial rate of ACC liberation versus time (RFU/s). Each experiment was performed in standard caspase buffer (buffers for caspases 8, 9, and 10 were supplemented with 1.0 M of sodium citrate).



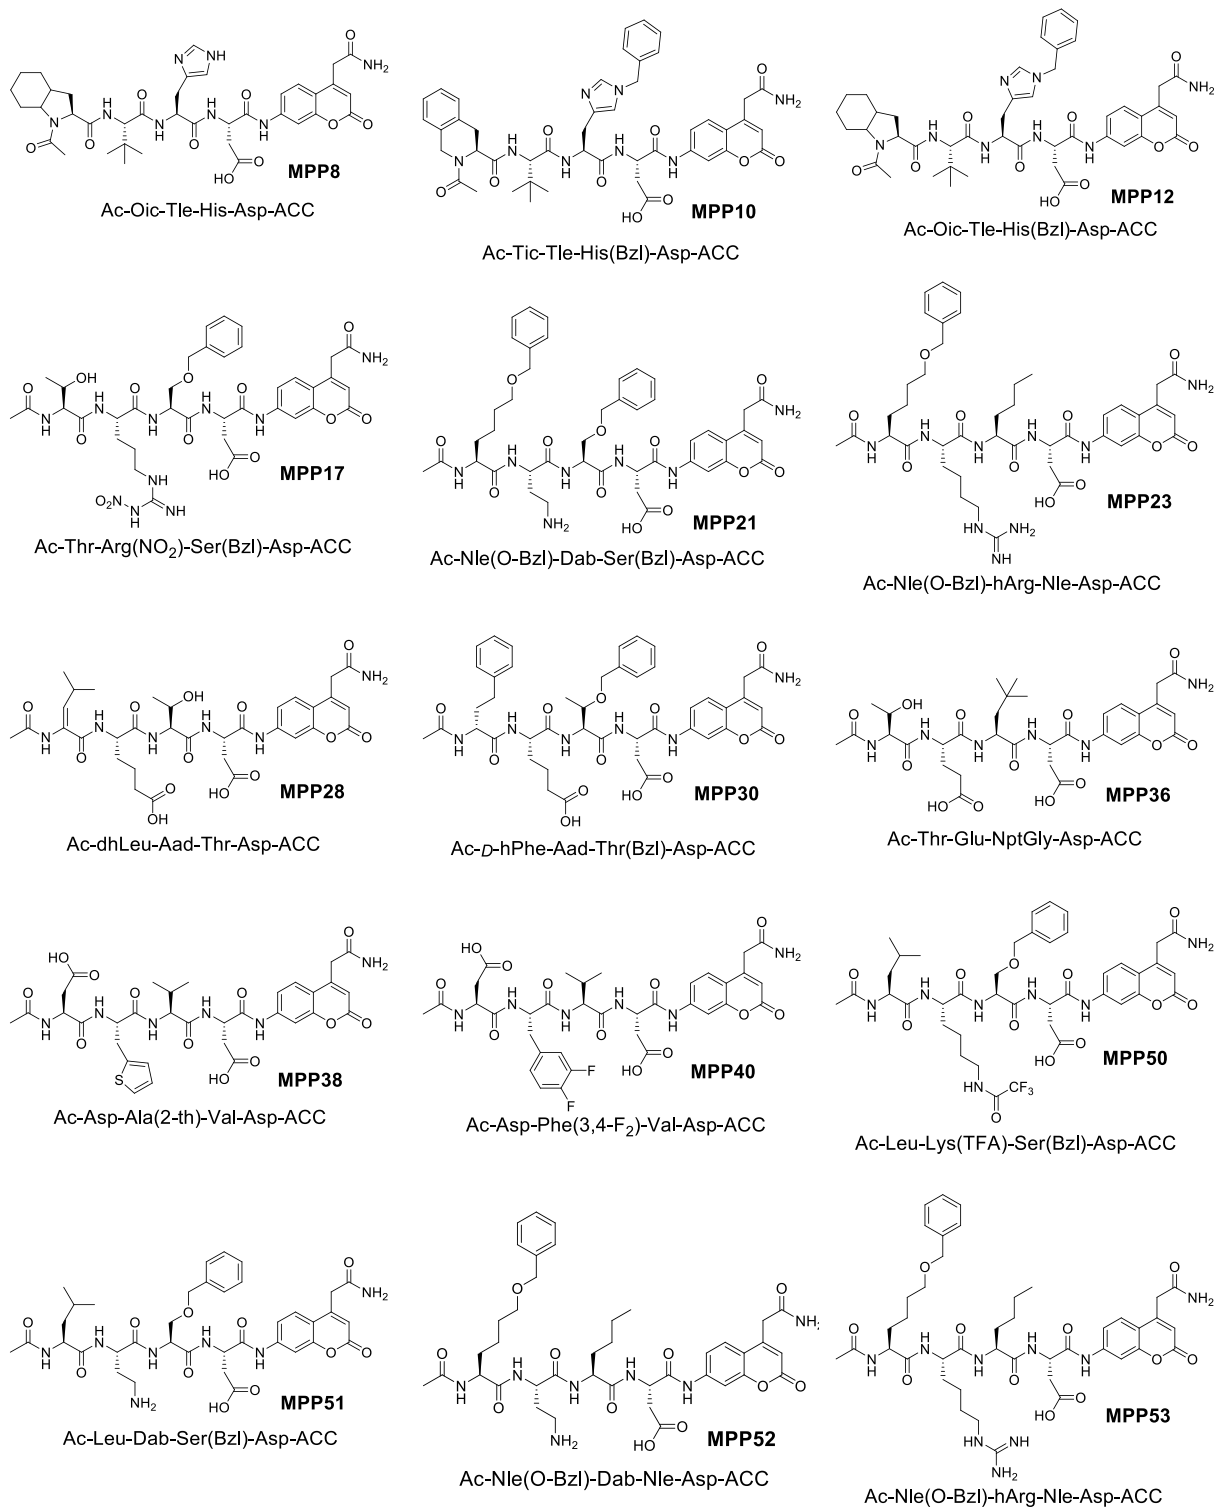

**Supplementary Figure 9. Structures of caspases-selective fluorogenic substrates.**

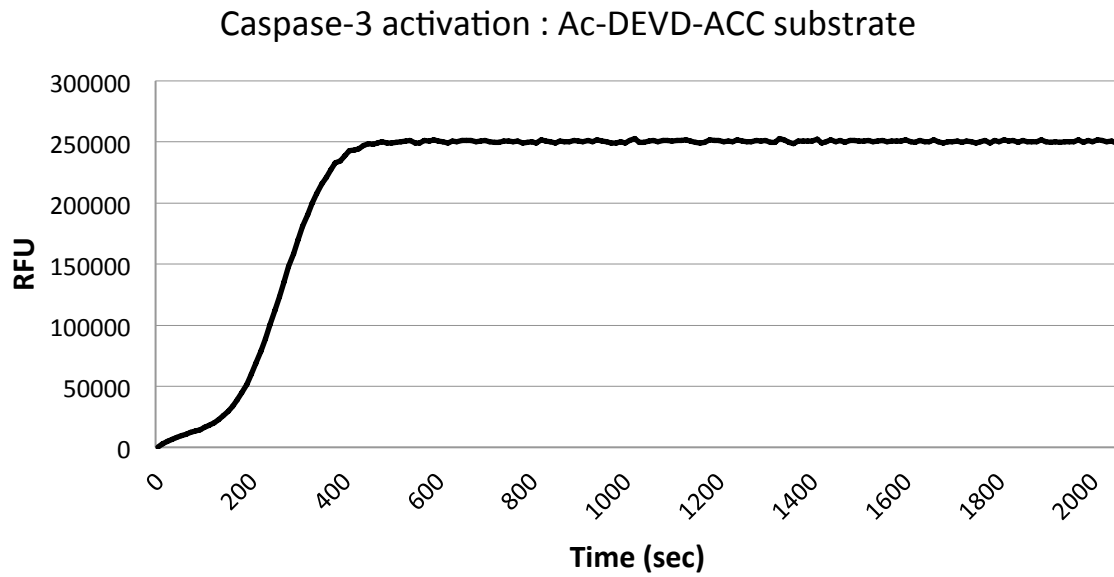

**Supplementary Figure 10. Caspase 3 activation measured with Ac-DEVD-ACC.** Substrate concentration 250  $\mu$ M. Cytosolic extract was treated with cytochrome C and dATP (see Materials and Methods) and used without pre-incubation. The assay was performed at 37°C.

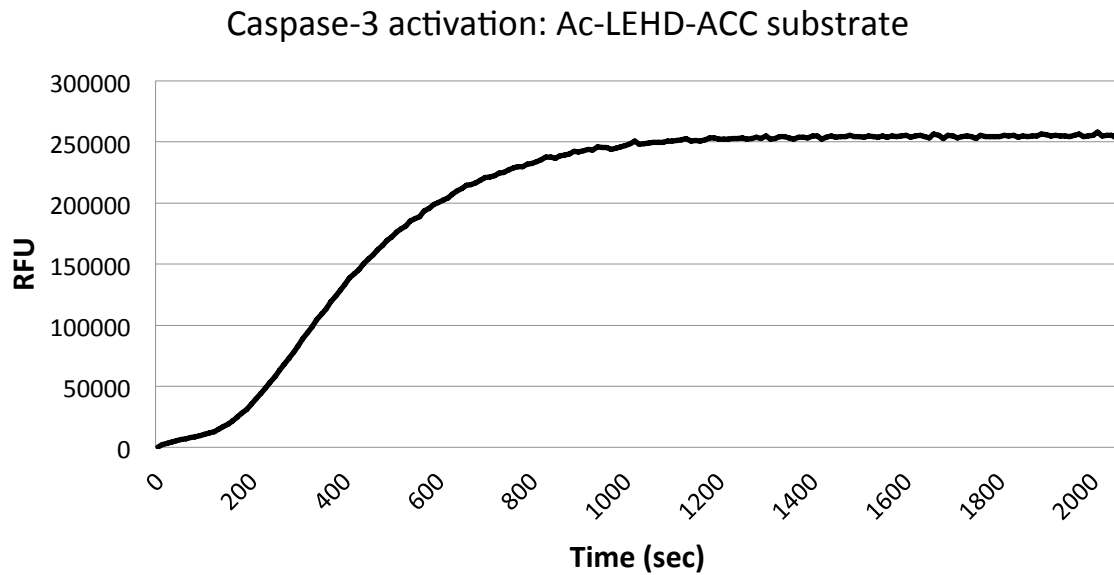

**Supplementary Figure 11. The Ac-LEHD-ACC hydrolysis time course.** Detailed kinetic analysis with the use of XIAP-BIR2 and XIAP-BIR3 clearly demonstrated that Ac-LEHD-ACC is hydrolyzed mainly by caspase 3, making this substrate useless as caspase 9 probe. Substrate concentration 250  $\mu$ M. Cytosolic extract was stimulated with cytochrome C and dATP (see Materials and Methods) and used without incubation. Assay was performed at 37°C.

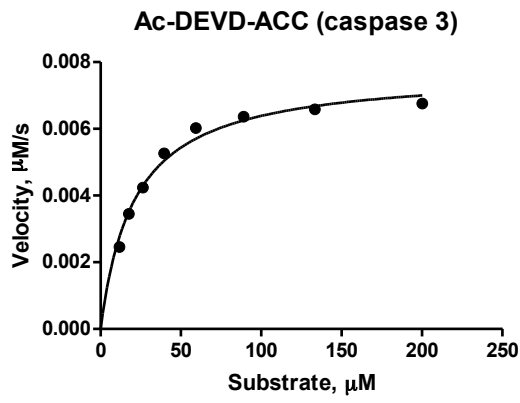

Equation 1:

$$V_{max} = k_{cat} * [E] \rightarrow k_{cat} = \frac{V_{max}}{[E]}$$

$$\frac{k_{cat}}{K_m} = \frac{V_{max}}{[E] * K_m}$$

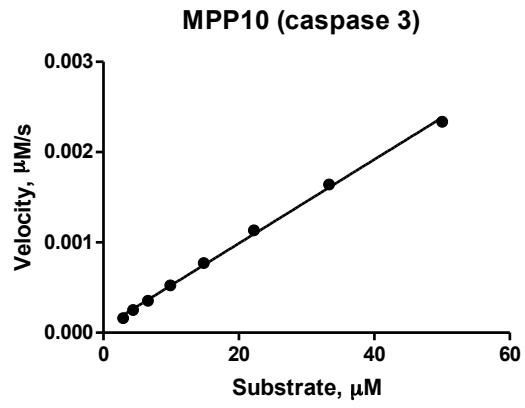

Equation 2:

$$slope = \frac{\Delta V}{\Delta [S]}$$

$$\frac{k_{cat}}{K_m} = \frac{slope}{[E]} = \frac{\Delta V}{\Delta [S] * [E]}$$

**Supplementary Figure 12. Calculation of  $k_{cat}/K_M$  parameters – for good substrates (left) and for poor substrates (right).**

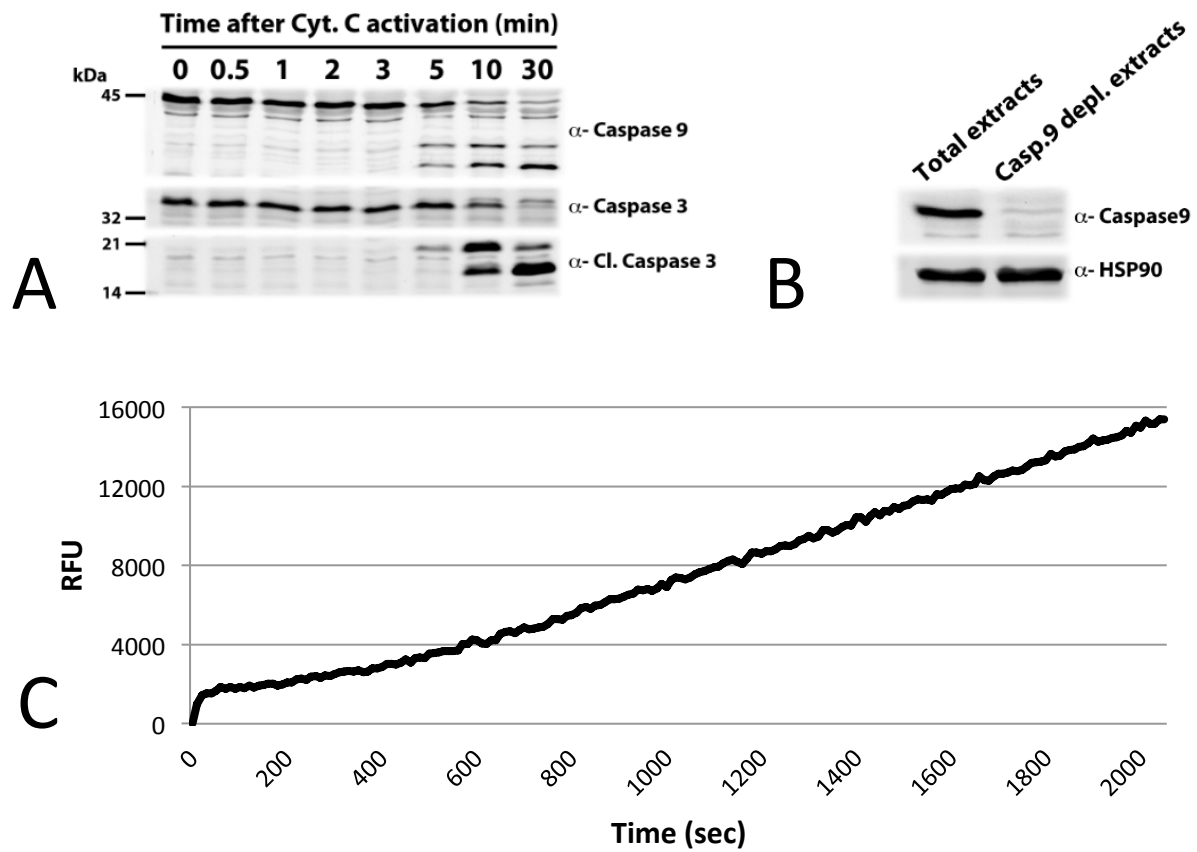

**Supplementary Figure 13. Time course of caspase 9 activation.** (A) Cytosolic extracts were stimulated with cytochrome C and caspase 9 and caspase 3 cleavage was monitored over the time course. (B) Caspase 9 immunodepletion from cytosolic extracts. Western Blot showing the absence of Caspase 9 in the immunodepleted sample. (C) Caspase 9 activation in cellular extract measured with the use of MPP8, a selective short peptide-based caspase 9 substrate. The “burst” in first 40-60 seconds is caused by cytochrome C and it appears also in the absence of cytosolic extracts (data not shown). The activity of caspase 9 can be measured after 60 seconds after cytochrome stimulation.

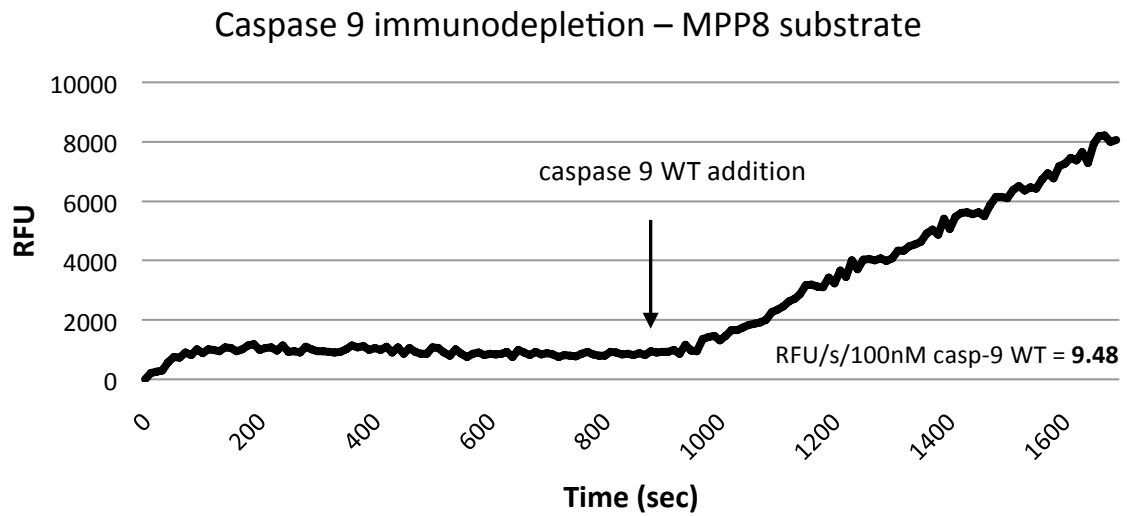

**Supplementary Figure 13. Monitoring of the MPP8 hydrolysis by the addition of caspase 9 WT to the caspase 9 immunodepleted cytosolic extract.** The proteolytic activity of caspase 9 immunodepleted cytosolic extract has been monitored with the use of MPP8 substrate (200  $\mu$ M). After 15 minutes a recombinant wild type caspase 9 was added (100 nM) and the measurement was continued.

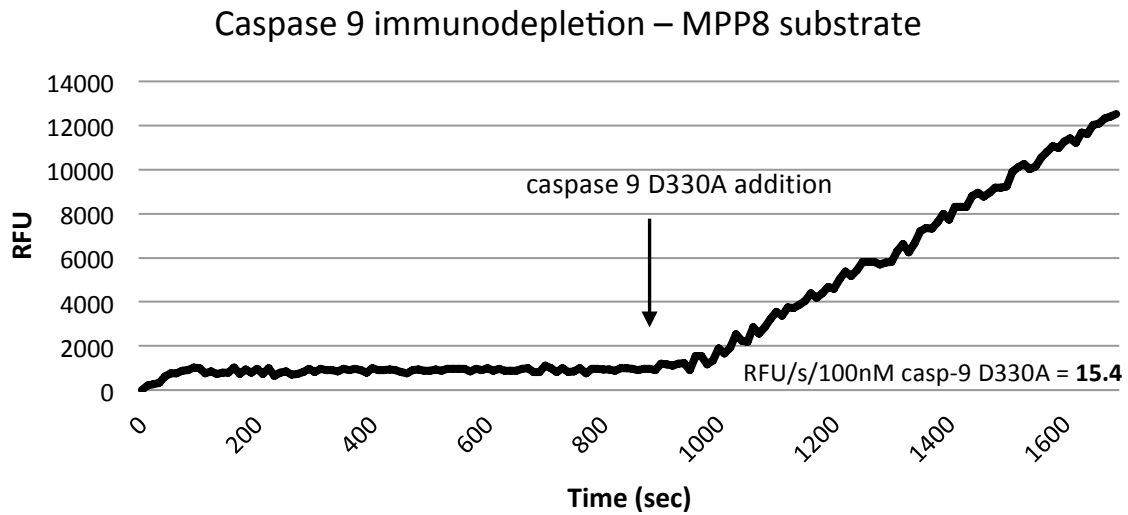

**Supplementary Figure 15. Monitoring of the MPP8 hydrolysis by the addition of caspase 9 D330A mutant to the caspase 9 immunodepleted cytosolic extract.** The proteolytic activity of caspase 9 immunodepleted cytosolic extract has been monitored with the use of MPP8 substrate (200  $\mu$ M). After 15 minutes a recombinant caspase 9 D330A mutant was added (100 nM) and the measurement was continued.

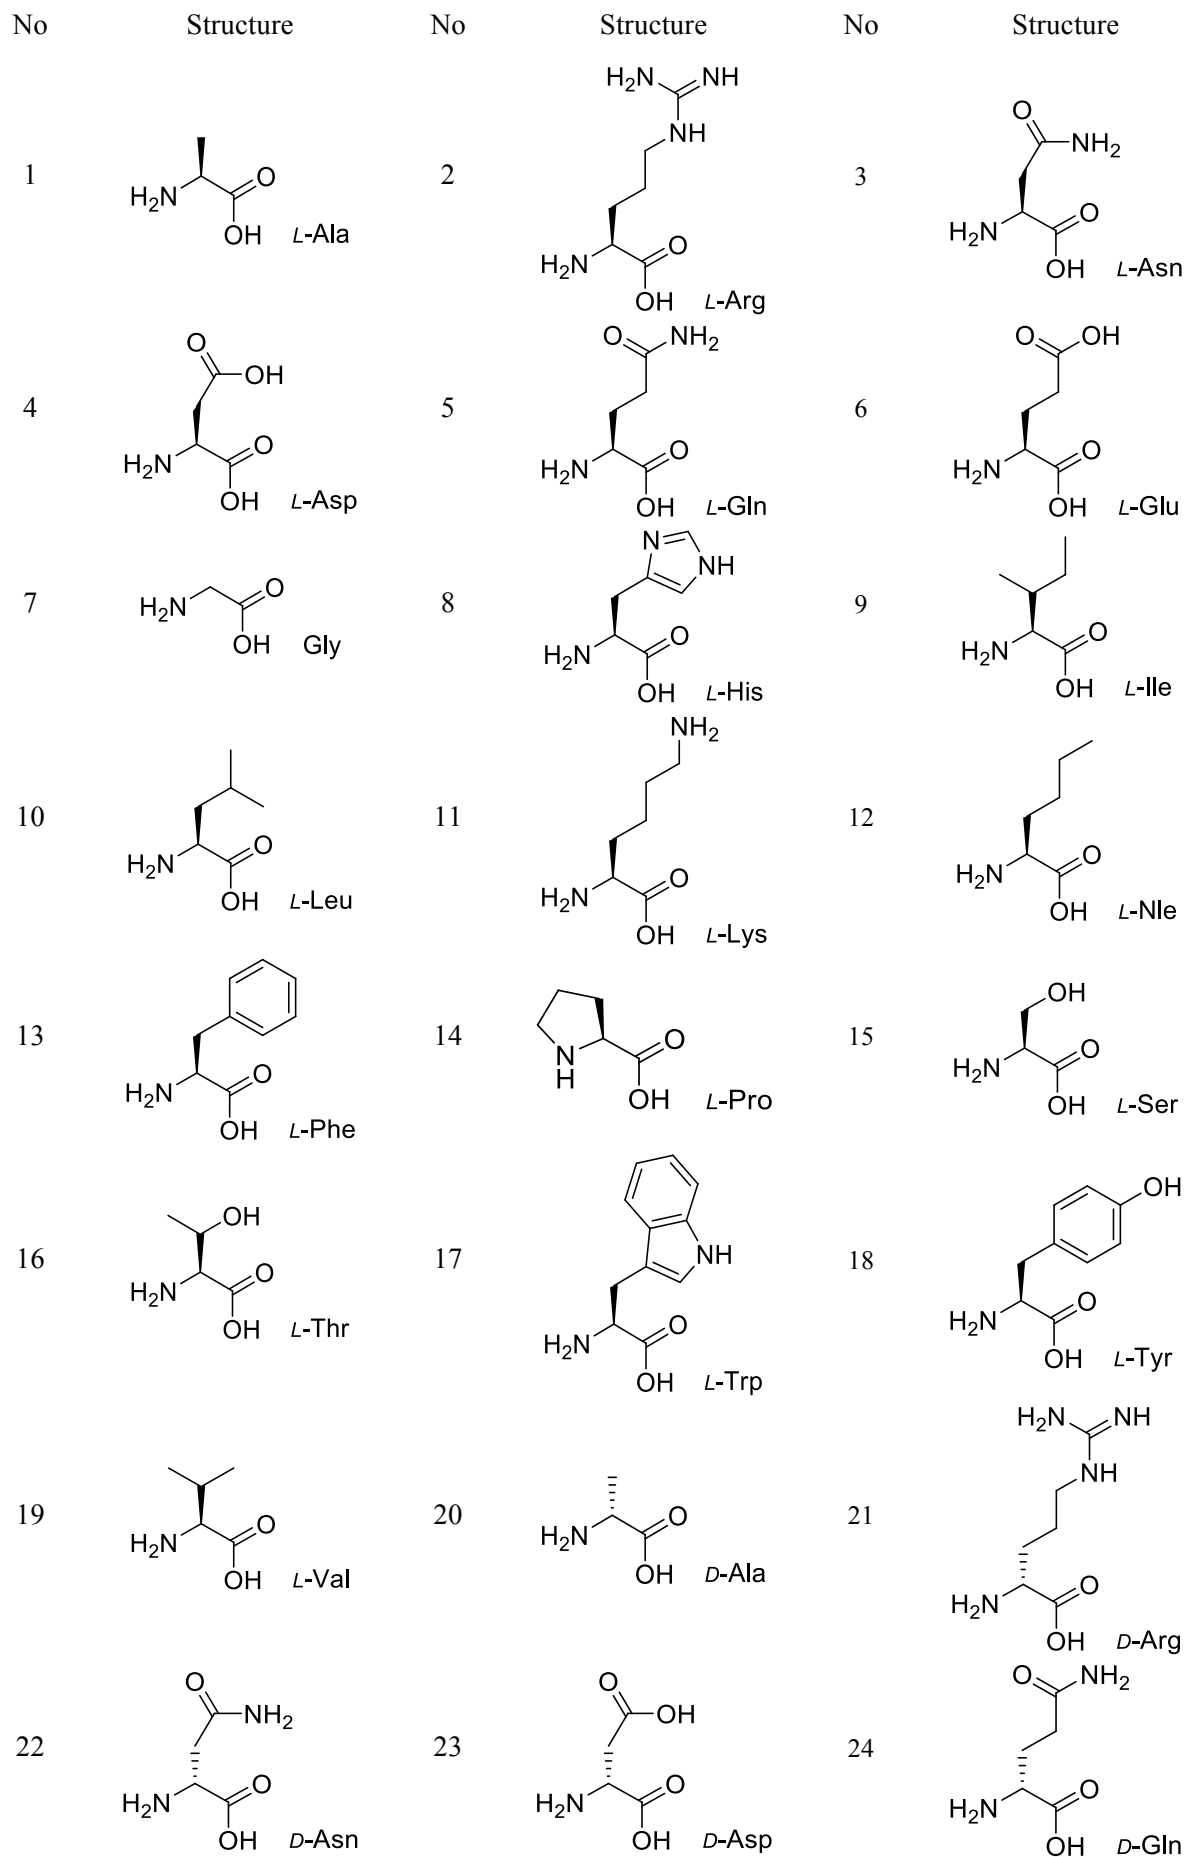



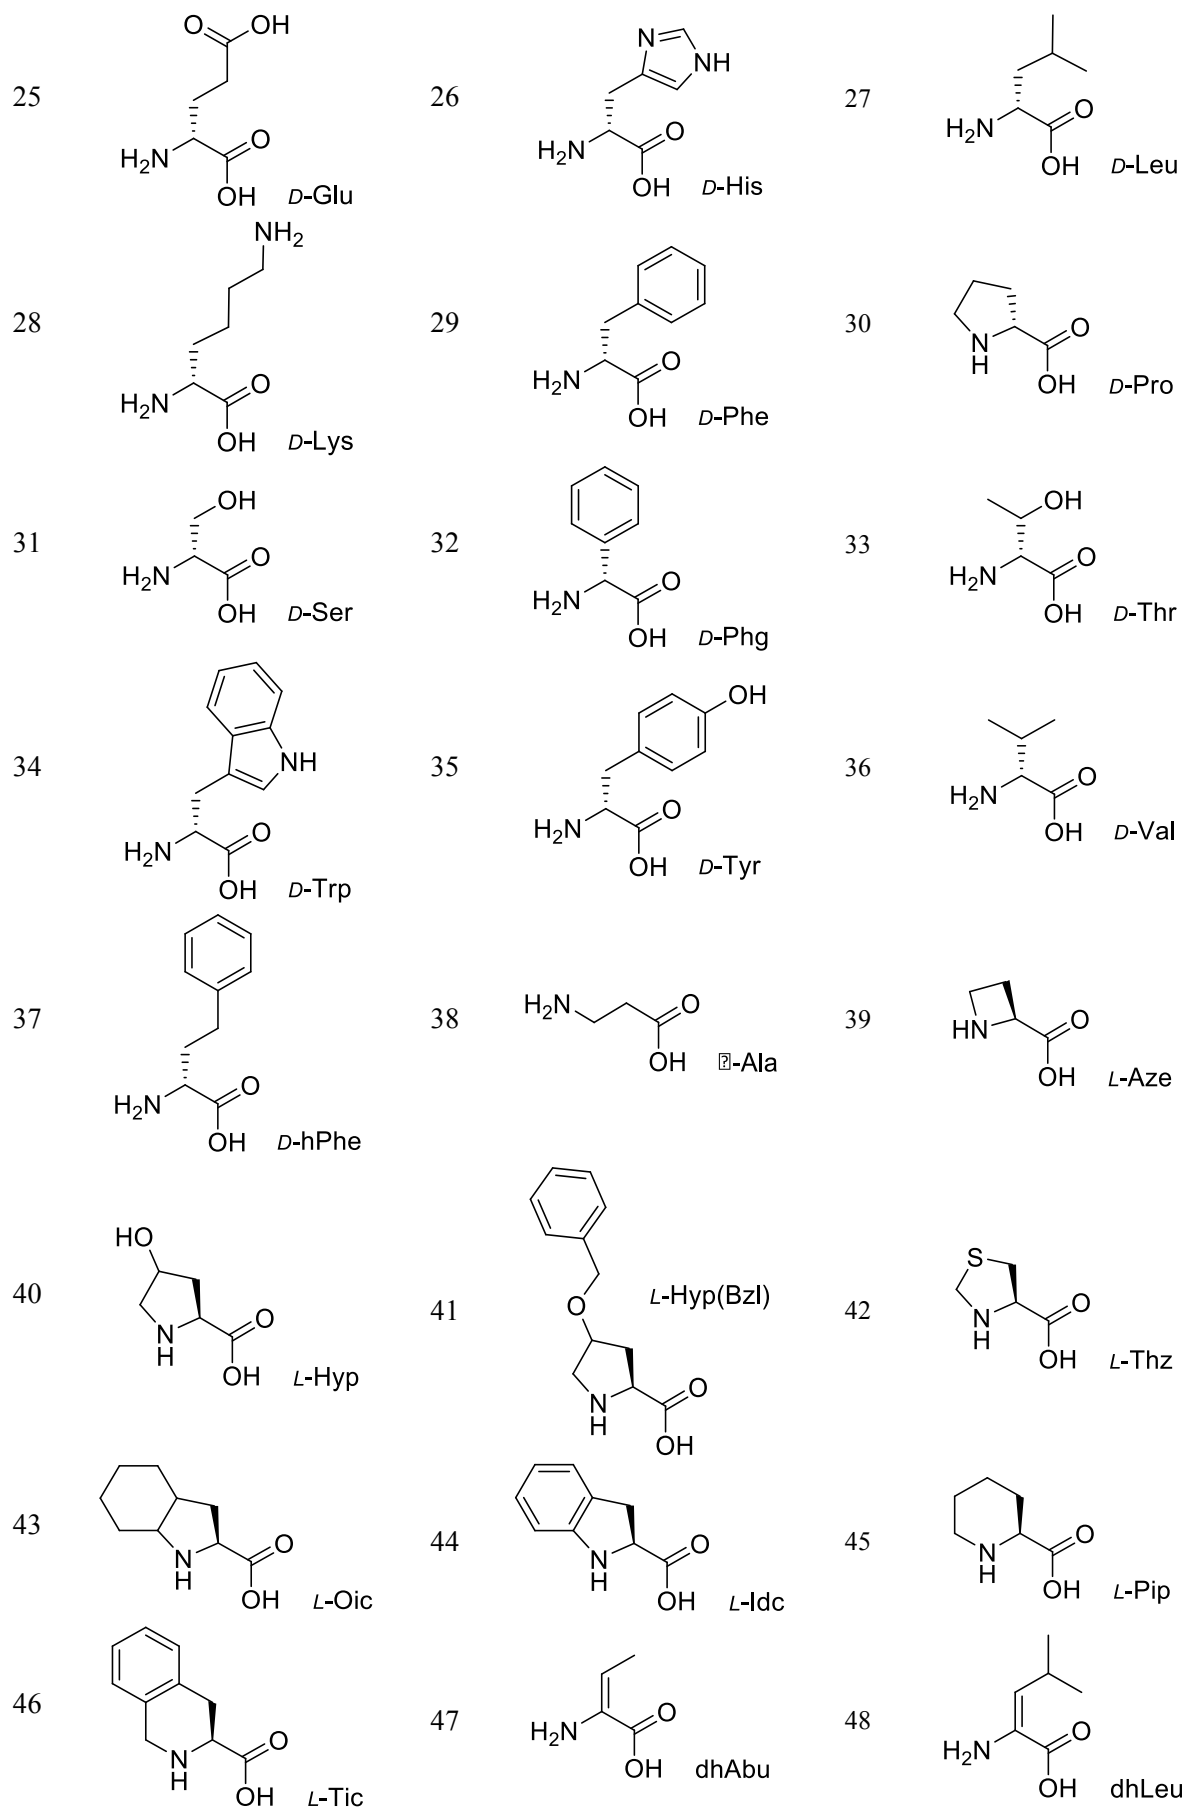

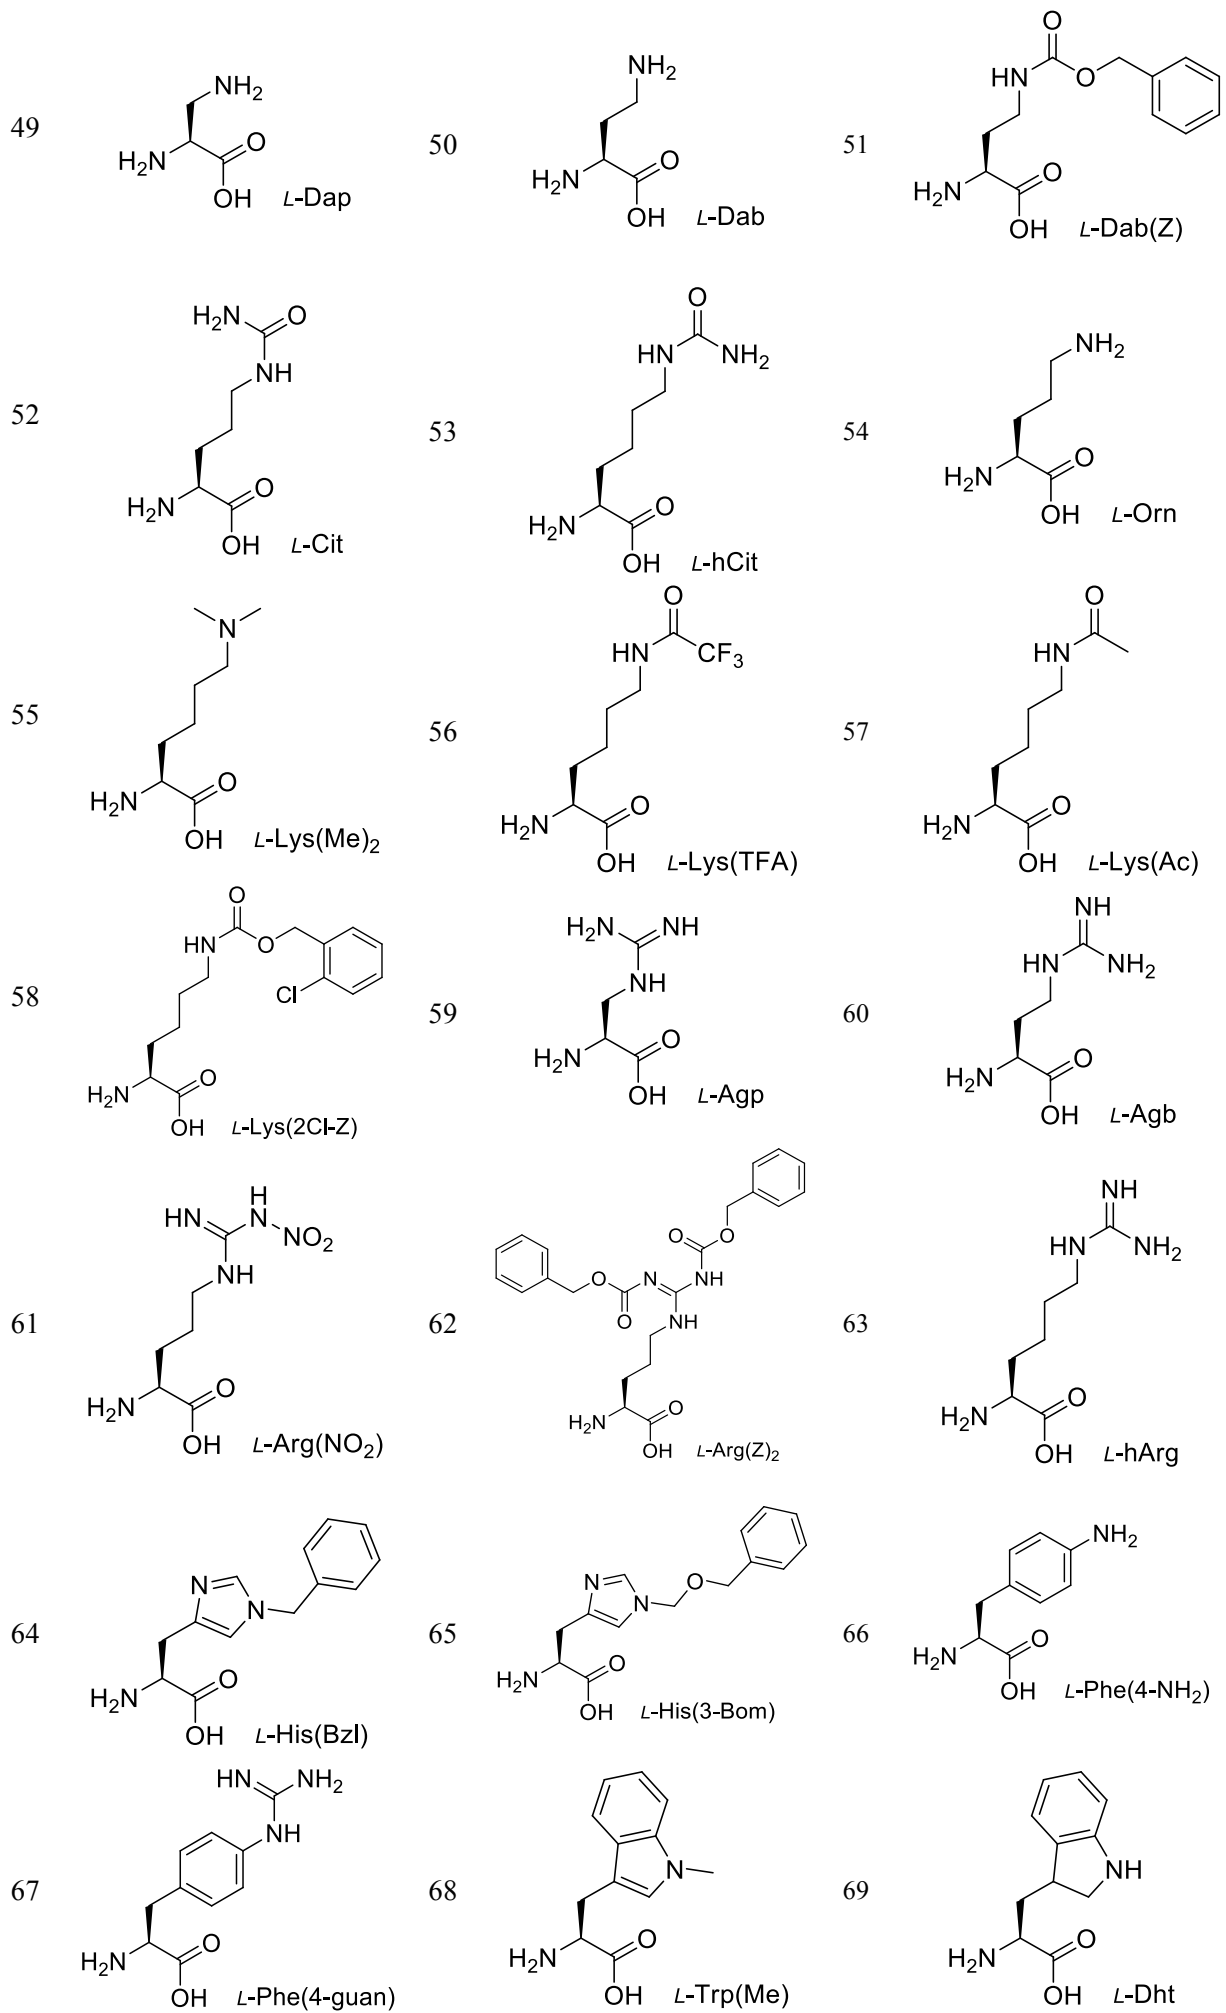

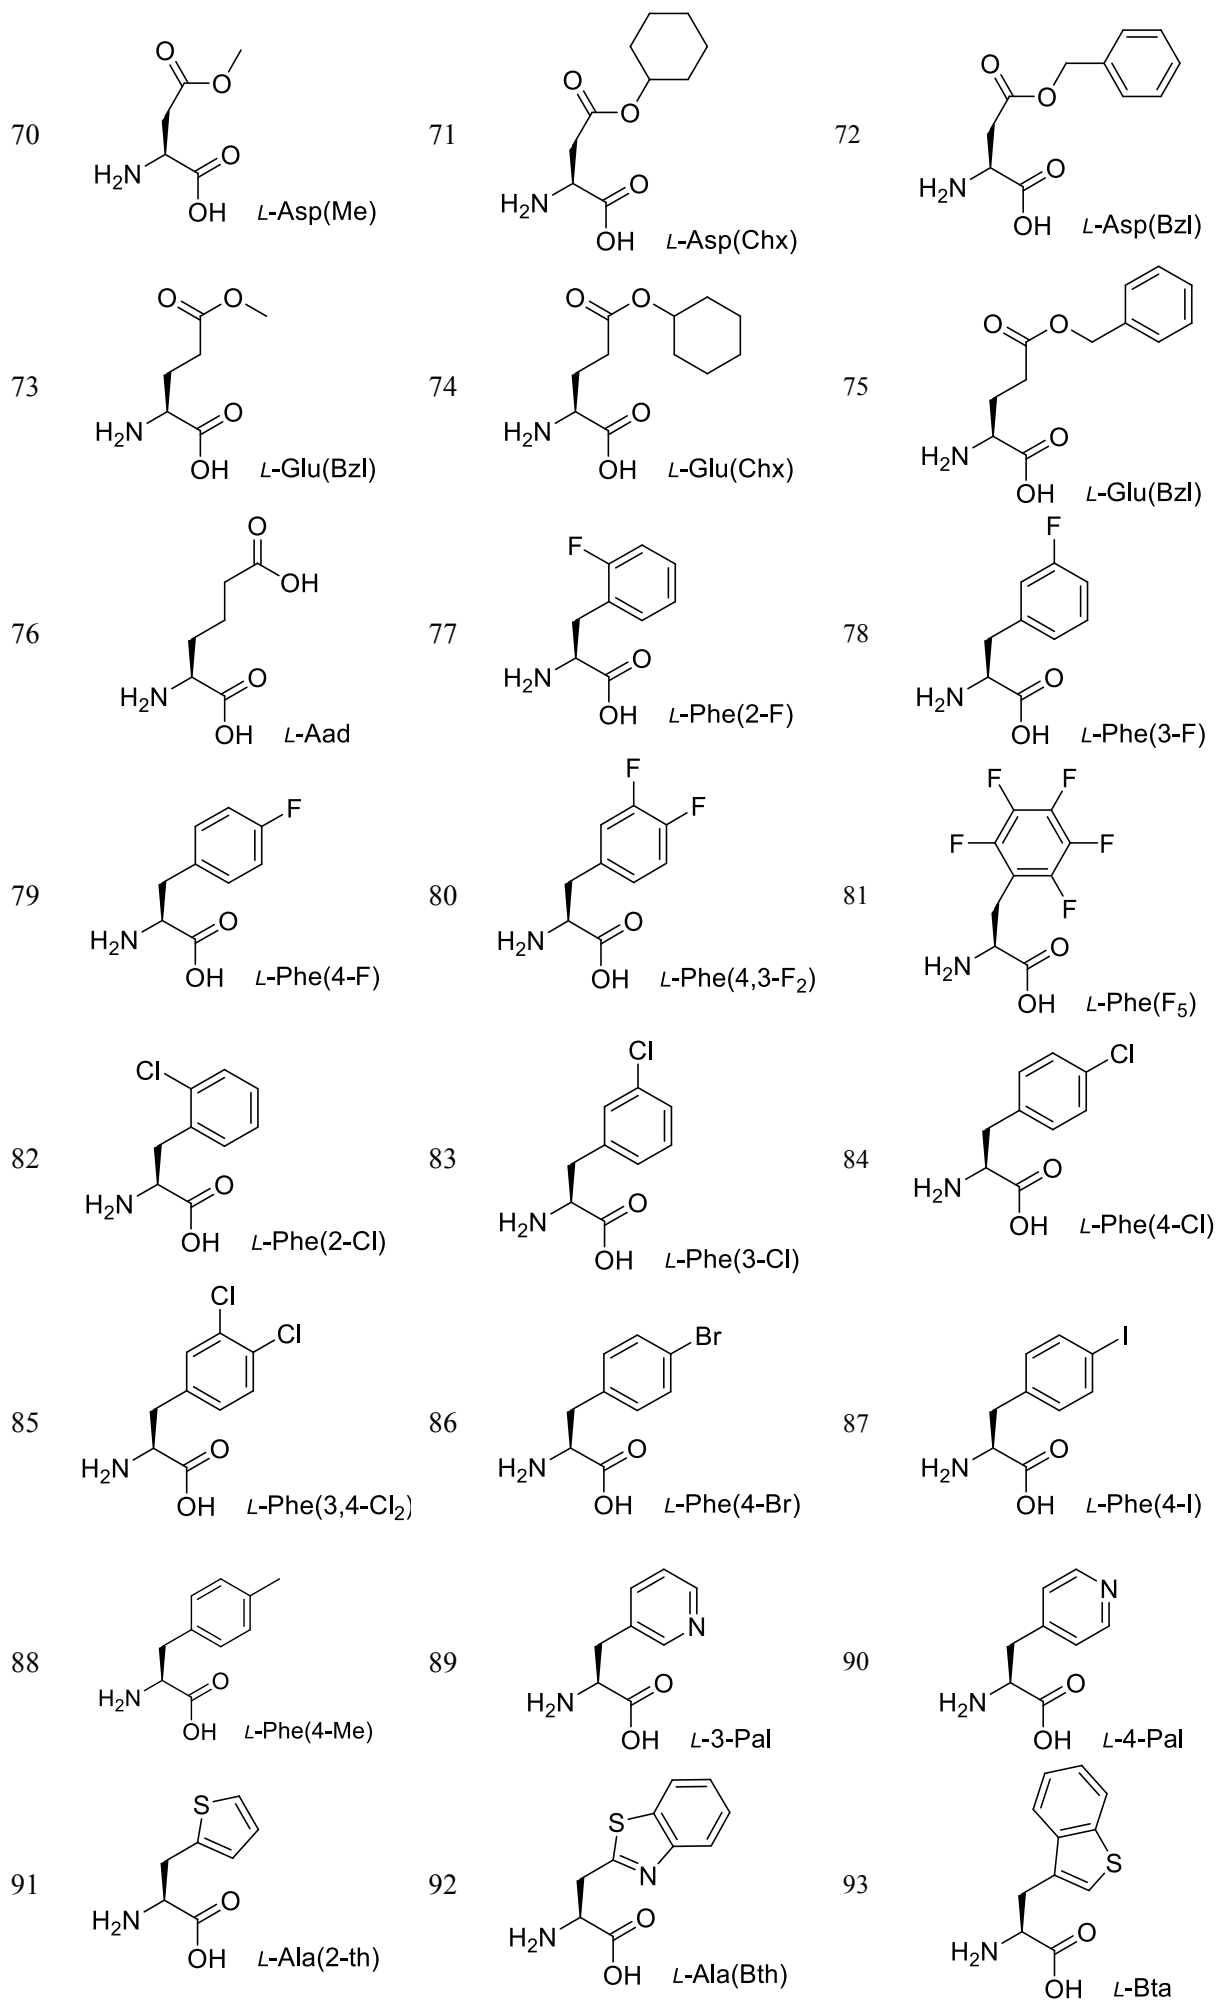

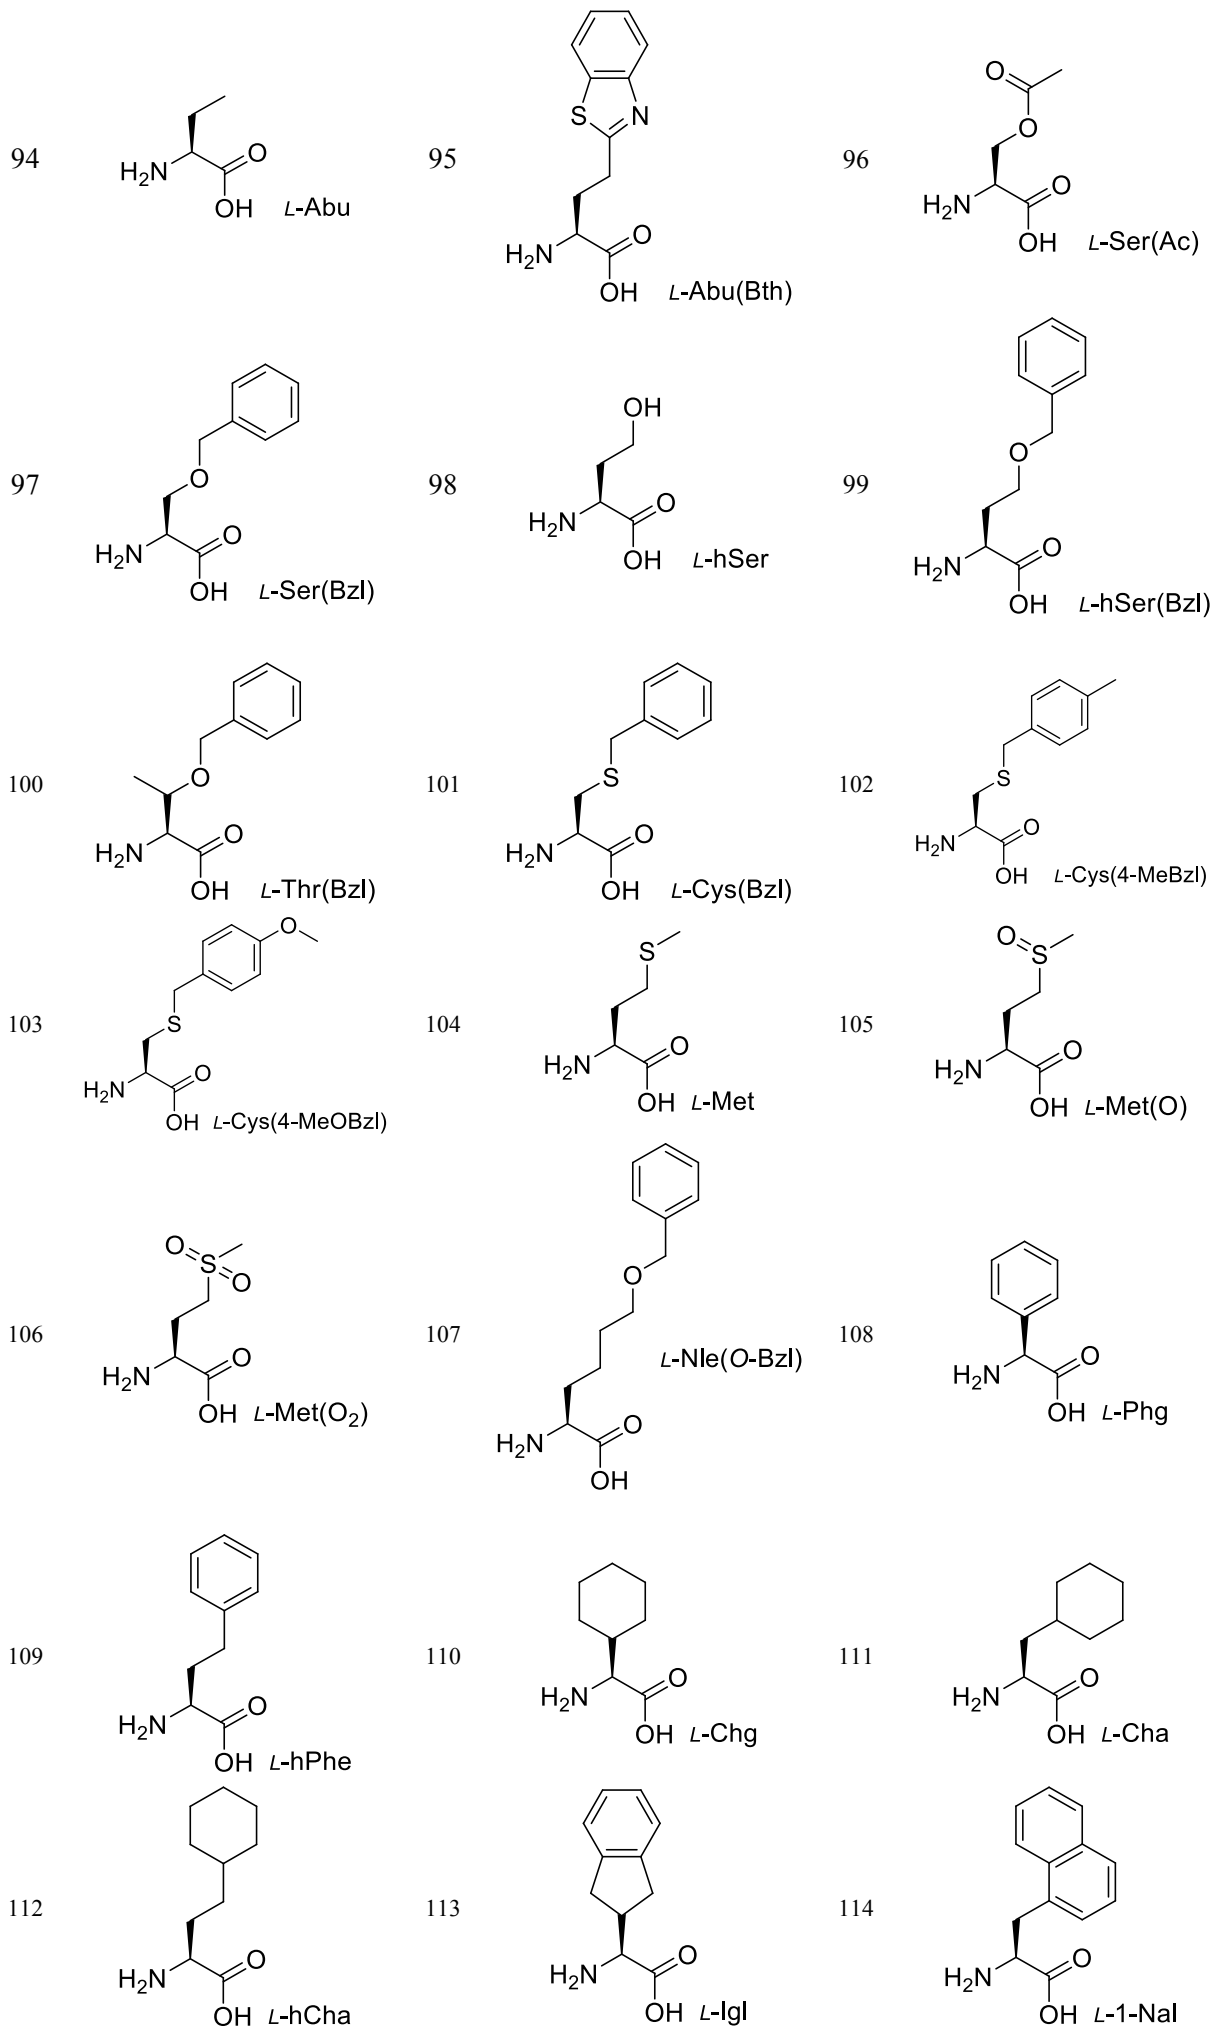

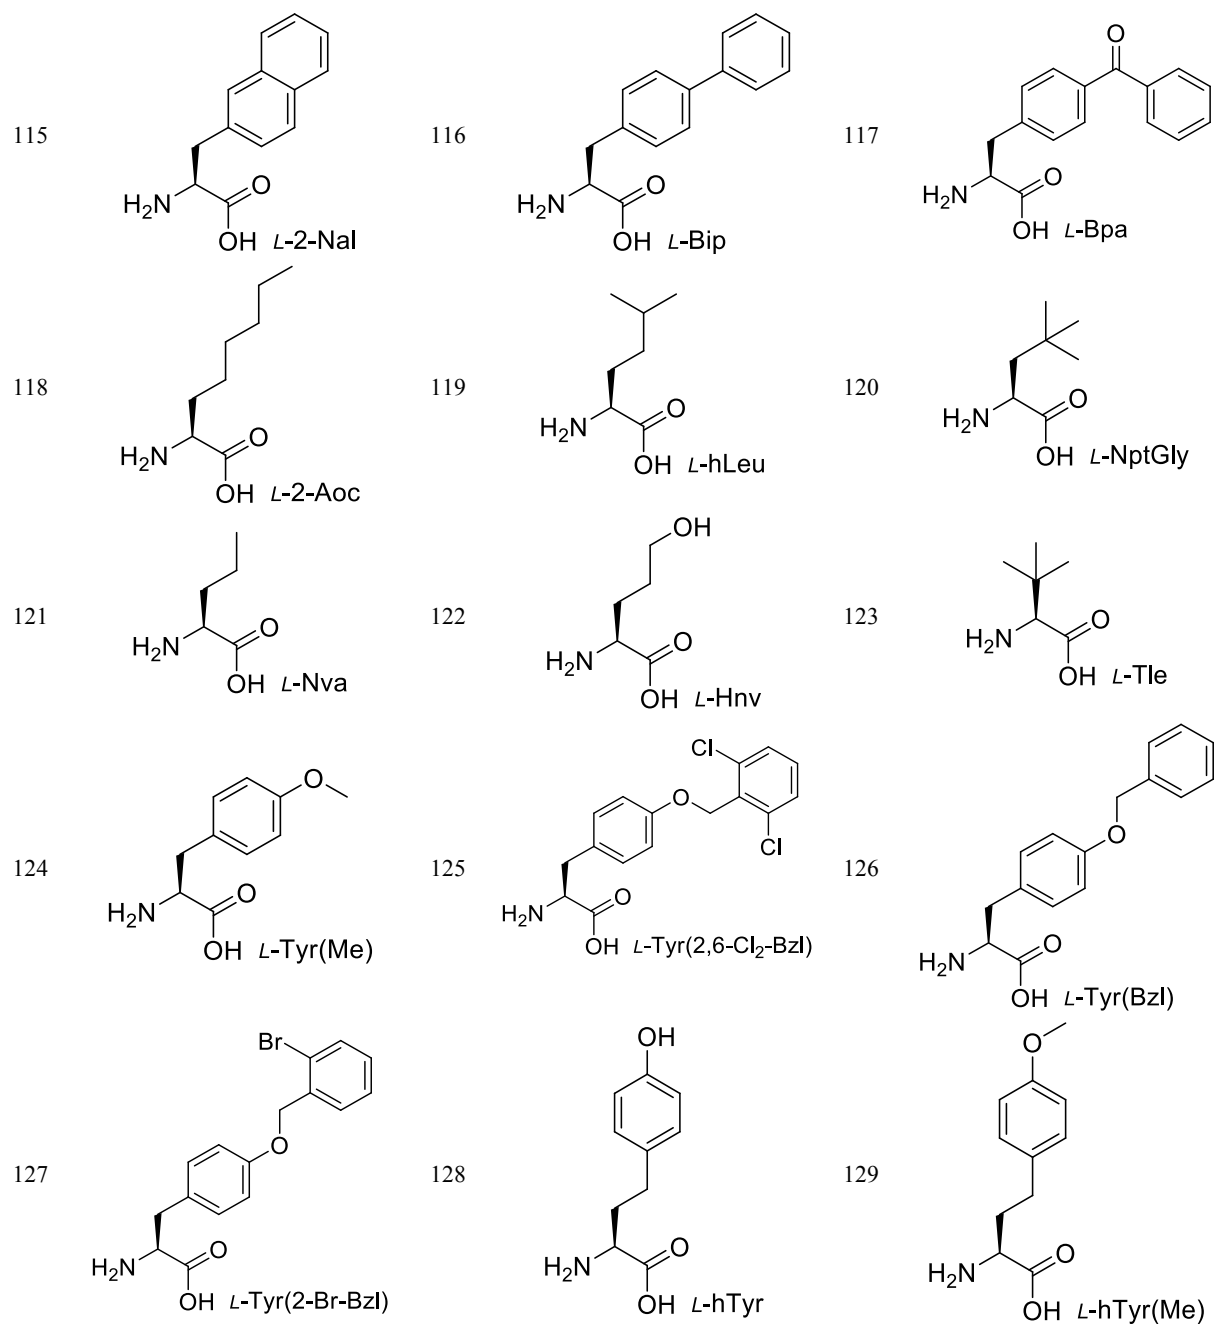

**Supplementary Table 5. Structure of amino acids used in HyCoSuL synthesis.**

## Compounds analysis

All individual compounds used for kinetic and biological studies were purified by HPLC on a Waters M600 solvent delivery module with a Waters M2489 detector system using Waters Spherisorb S50DS2 column and characterized by high-resolution mass spectrometry (HRMS) using on High Resolution Mass Spectrometer WATERS LCT Premier XE with Electrospray ionization (ESI). Overall yields for the complete synthesis and HRMS data are listed below.

**Ac-DEVD-ACC**, 32.1% yield. HRMS (m/z): [M]<sup>+</sup> calcd for C<sub>31</sub>H<sub>38</sub>N<sub>6</sub>O<sub>14</sub>, 719.6652 found, 719.2532

**Ac-LEHD-ACC**, 29.3% yield. HRMS (m/z): [M]<sup>+</sup> calcd for C<sub>34</sub>H<sub>42</sub>N<sub>8</sub>O<sub>12</sub>, 755.2922 found, 755.2966

**Ac-IETD-ACC**, 25.8% yield. HRMS (m/z): [M]<sup>+</sup> calcd for C<sub>32</sub>H<sub>42</sub>N<sub>6</sub>O<sub>13</sub>, 719.2810 found, 719.2859

**Ac-AEVD-ACC**, 24.6% yield. HRMS (m/z): [MNa]<sup>+</sup> calcd for C<sub>30</sub>H<sub>38</sub>N<sub>6</sub>NaO<sub>12</sub>, 697.2440 found, 697.2444

**Ac-VEID-ACC**, 33.3% yield. HRMS (m/z): [MNa]<sup>+</sup> calcd for C<sub>33</sub>H<sub>44</sub>N<sub>6</sub>NaO<sub>12</sub>, 739.2909 found, 739.2908

**Ac-VDVAD-ACC**, 34.5% yield. HRMS (m/z): [MNa]<sup>+</sup> calcd for C<sub>34</sub>H<sub>45</sub>N<sub>7</sub>NaO<sub>13</sub>, 782.2967 found, 782.2966

**MPP8**, 28.9% yield. HRMS (m/z): [M]<sup>+</sup> calcd for C<sub>38</sub>H<sub>48</sub>N<sub>8</sub>O<sub>10</sub>, 777.3493 found, 777.3580

**MPP10**, 39.0% yield. HRMS (m/z): [M]<sup>+</sup> calcd for C<sub>46</sub>H<sub>50</sub>N<sub>8</sub>O<sub>10</sub>, 875.3650 found, 875.3729

**MPP12**, 35.7% yield. HRMS (m/z): [M]<sup>+</sup> calcd for C<sub>45</sub>H<sub>54</sub>N<sub>8</sub>O<sub>10</sub>, 867.3963 found, 867.3593

**MPP17**, 35.45% yield. HRMS (m/z): [M]<sup>+</sup> calcd for C<sub>37</sub>H<sub>46</sub>N<sub>10</sub>O<sub>14</sub>, 855.3195 found, 855.3266

**MPP21**, 32.2% yield. HRMS (m/z): [M]<sup>+</sup> calcd for C<sub>44</sub>H<sub>53</sub>N<sub>7</sub>O<sub>12</sub>, 872.3752 found, 872.3831

**MPP23**, 27.5% yield. HRMS (m/z): [M]<sup>+</sup> calcd for C<sub>43</sub>H<sub>59</sub>N<sub>9</sub>O<sub>11</sub>, 878.4334 found, 878.4421

**MPP28**, 31.2% yield. HRMS (m/z): [M]<sup>+</sup> calcd for C<sub>33</sub>H<sub>42</sub>N<sub>6</sub>O<sub>13</sub>, 731.2810 found, 731.2879

**MPP30**, 32.2% yield. HRMS (m/z): [MNa]<sup>+</sup> calcd for C<sub>44</sub>H<sub>50</sub>N<sub>6</sub>NaO<sub>13</sub>, 893.3328 found, 893.3328

**MPP36**, 17.9% yield. HRMS (m/z): [M]<sup>+</sup> calcd for C<sub>33</sub>H<sub>44</sub>N<sub>6</sub>O<sub>13</sub>, 733.2966 found, 733.3005

**MPP38**, 27.5% yield. HRMS (m/z): [MNa]<sup>+</sup> calcd for C<sub>33</sub>H<sub>38</sub>N<sub>6</sub>NaO<sub>12</sub>S, 765.2160 found, 765.2180

**MPP39**, 31.1% yield. HRMS (m/z): [MNa]<sup>+</sup> calcd for C<sub>35</sub>H<sub>35</sub>F<sub>5</sub>N<sub>6</sub>NaO<sub>12</sub>, 849.2125 found, 849.2155

**MPP40**, 32.8% yield. HRMS (m/z): [MNa]<sup>+</sup> calcd for C<sub>35</sub>H<sub>38</sub>F<sub>2</sub>N<sub>6</sub>NaO<sub>12</sub>, 795.2408 found, 795.2421

**MPP41**, 28.6% yield. HRMS (m/z): [M]<sup>+</sup> calcd for C<sub>37</sub>H<sub>42</sub>N<sub>6</sub>O<sub>15</sub>, 811.2708 found, 811.2769

**MPP42**, 26.5% yield. HRMS (m/z): [M]<sup>+</sup> calcd for C<sub>39</sub>H<sub>42</sub>N<sub>6</sub>O<sub>13</sub>S, 835.2531 found, 835.2628

**MPP43**, 27.1% yield. HRMS (m/z): [MNa]<sup>+</sup> calcd for C<sub>38</sub>H<sub>46</sub>N<sub>6</sub>NaO<sub>13</sub>, 817.3015 found, 817.2991

**MPP45**, 30.1% yield. HRMS (m/z): [MNa]<sup>+</sup> calcd for C<sub>39</sub>H<sub>48</sub>N<sub>6</sub>NaO<sub>13</sub>, 831.3162 found, 831.3210

**MPP46**, 34.2% yield. HRMS (m/z): [MNa]<sup>+</sup> calcd for C<sub>40</sub>H<sub>50</sub>N<sub>6</sub>NaO<sub>13</sub>, 845.3328 found, 845.3335

**MPP47**, 21.4% yield. HRMS (m/z): [M]<sup>+</sup> calcd for C<sub>35</sub>H<sub>46</sub>N<sub>8</sub>O<sub>10</sub>, 739.3337 found, 739.3400

**MPP48**, 29.8% yield. HRMS (m/z): [MNa]<sup>+</sup> calcd for C<sub>38</sub>H<sub>46</sub>N<sub>6</sub>NaO<sub>13</sub>, 817.3015 found, 817.3004

**MPP49**, 24.3% yield. HRMS (m/z): [MNa]<sup>+</sup> calcd for C<sub>37</sub>H<sub>44</sub>N<sub>6</sub>NaO<sub>12</sub>, 787,2909 found, 787,2919

**MPP50**, 33.3% yield. HRMS (m/z): [MNa]<sup>+</sup> calcd for C<sub>42</sub>H<sub>50</sub>F<sub>3</sub>N<sub>7</sub>NaO<sub>12</sub>, 912.3362 found, 912.3362

**MPP51**, 26.4% yield. HRMS (m/z): [M]<sup>+</sup> calcd for C<sub>37</sub>H<sub>47</sub>N<sub>7</sub>O<sub>11</sub>, 766.3334 found, 766.3416

**MPP52**, 29.6% yield. HRMS (m/z): [M]<sup>+</sup> calcd for C<sub>40</sub>H<sub>53</sub>N<sub>7</sub>O<sub>11</sub>, 808.3803 found, 808.3878

**MPP53**, 22.5% yield. HRMS (m/z): [M]<sup>+</sup> calcd for C<sub>43</sub>H<sub>59</sub>N<sub>9</sub>O<sub>11</sub>, 878.4334 found, 878.4424

Ac-DEVD-ACC

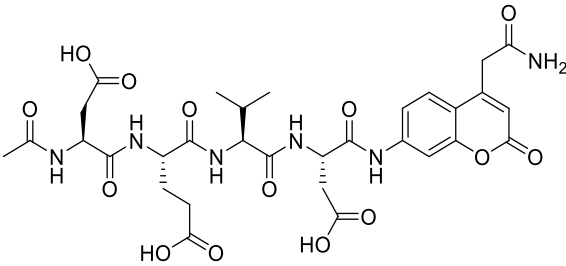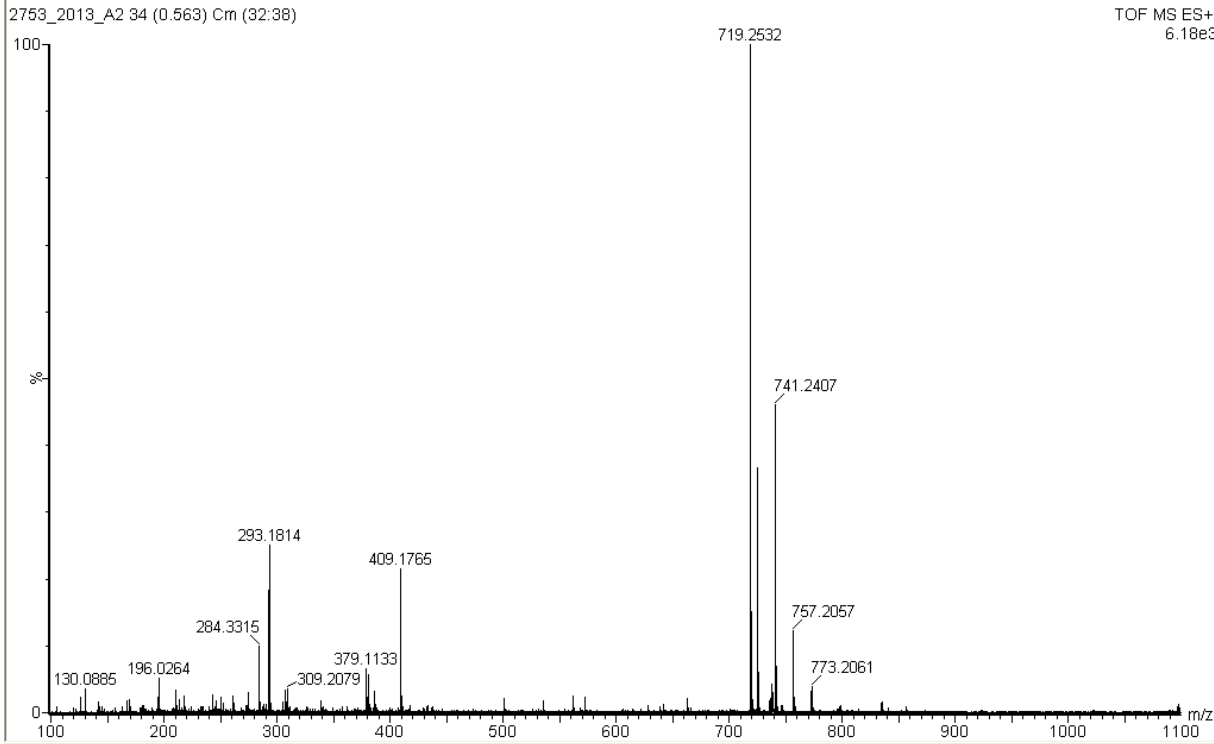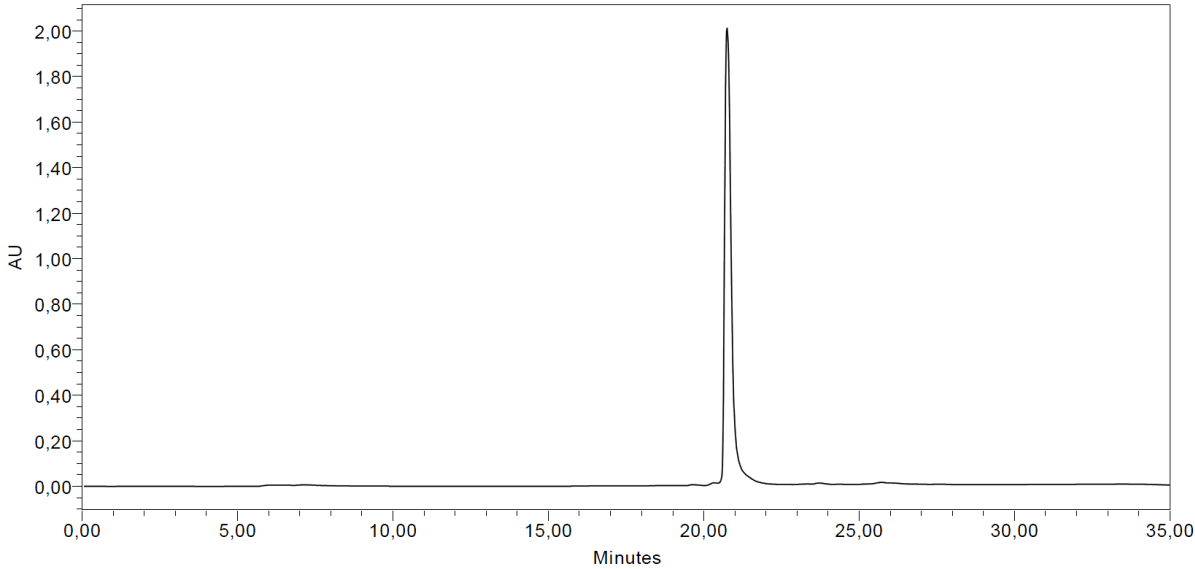



# Ac-LEHD-ACC

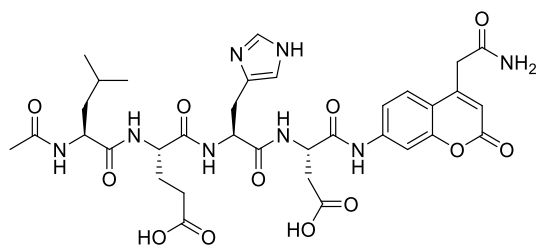

2754\_2013\_A1 167 (2.834)

TOF MS ES+  
1.81e3

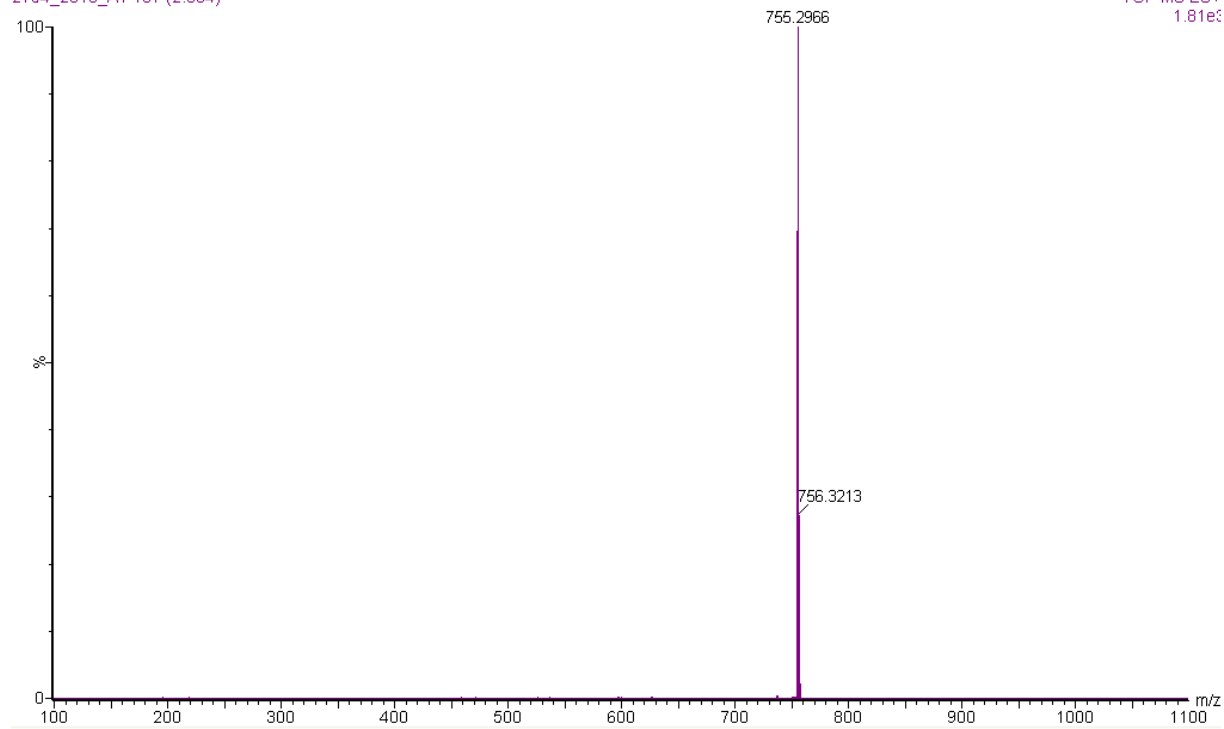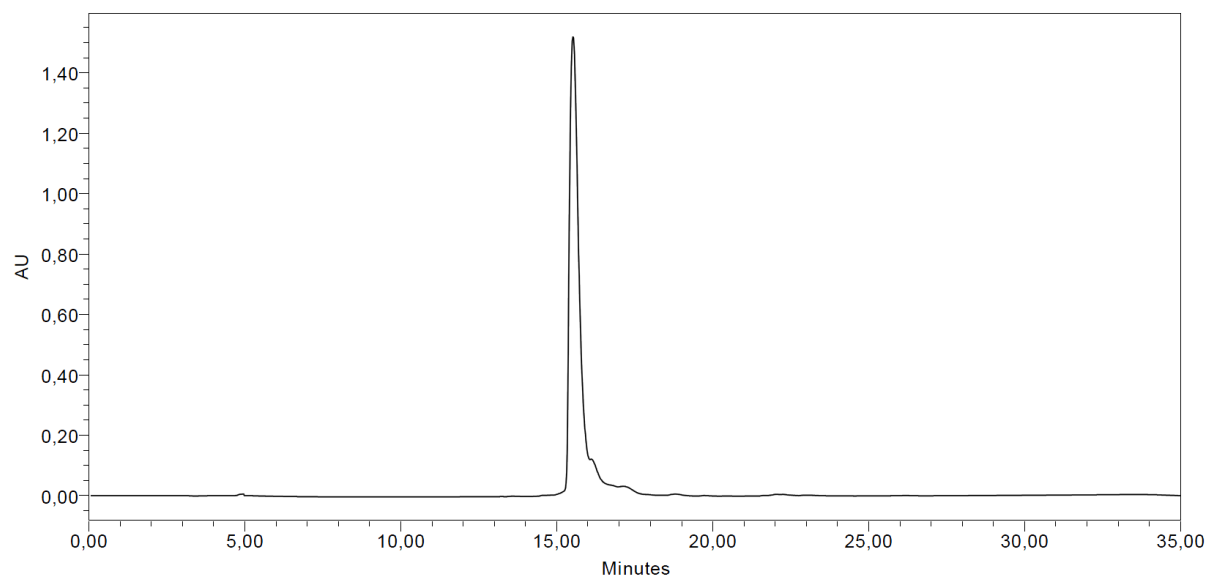

Ac-IETD-ACC

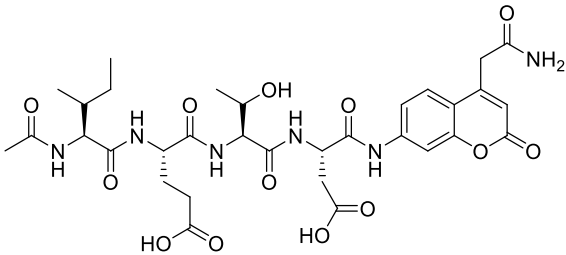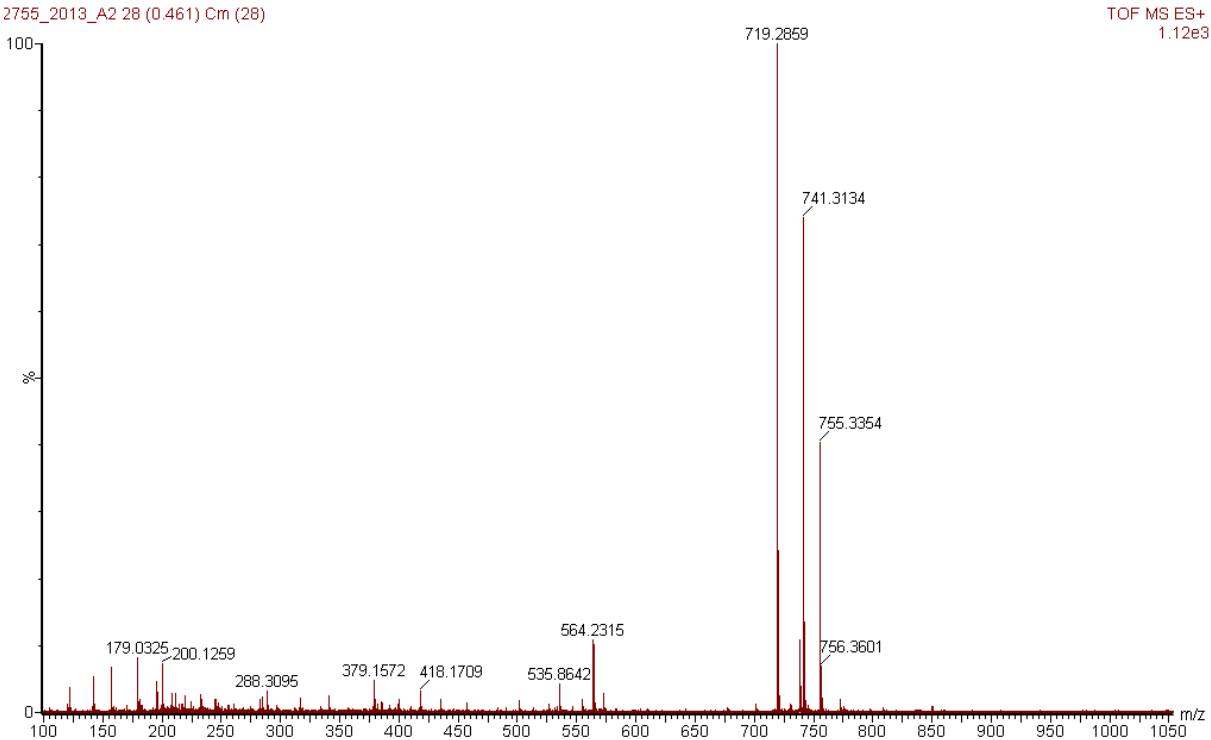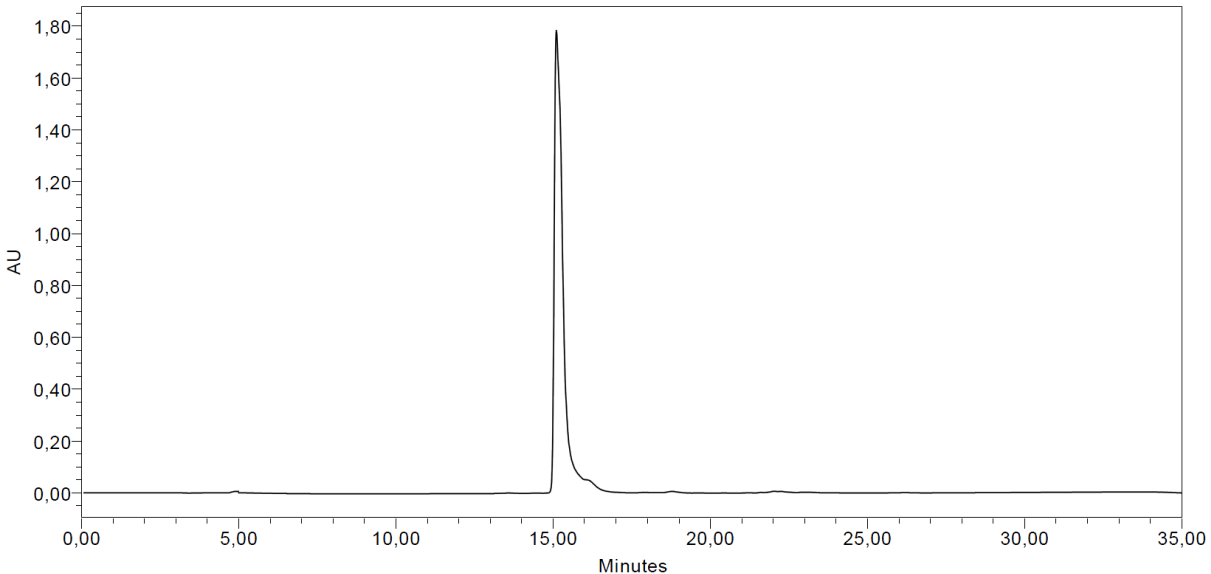

# Ac-AEVD-ACC

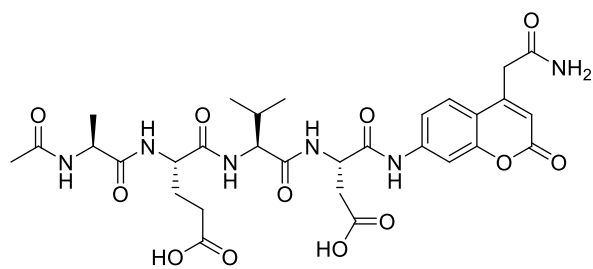

3479\_2013\_A6 13 (0.205)

TOF MS ES+  
1.26e3

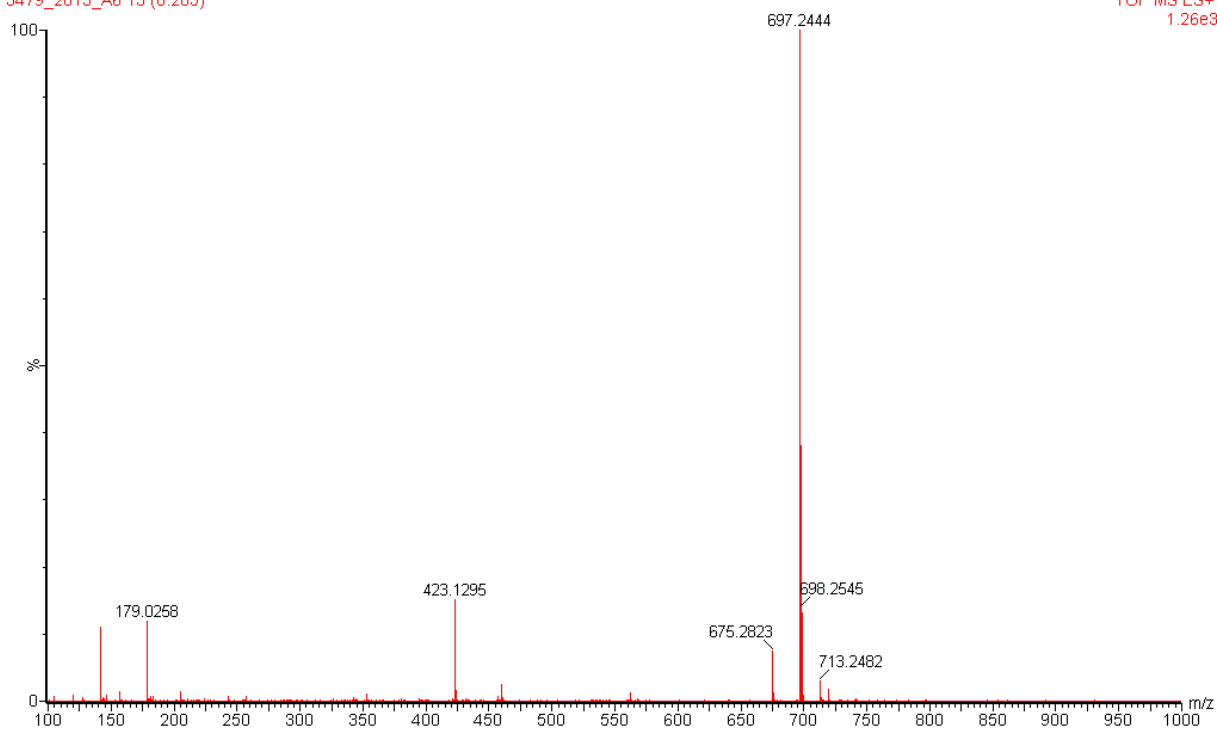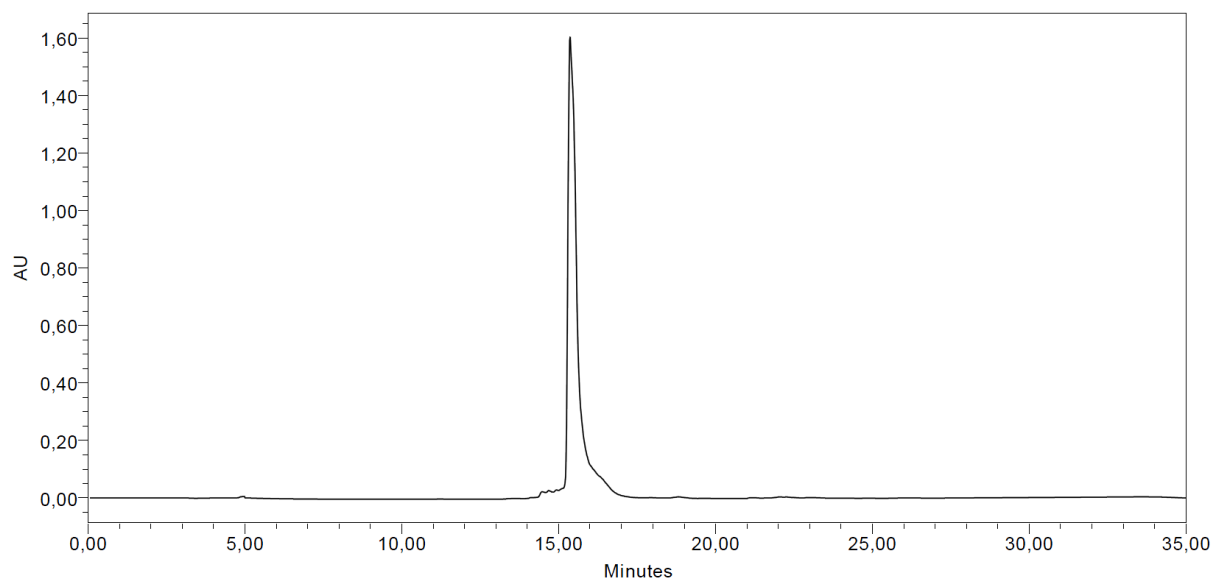





# MPP8

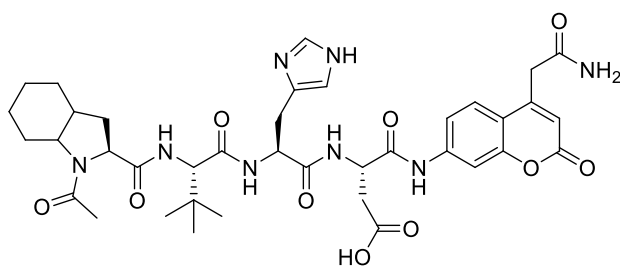

2765\_2013\_A2 8 (0.120) Cm (7:8)

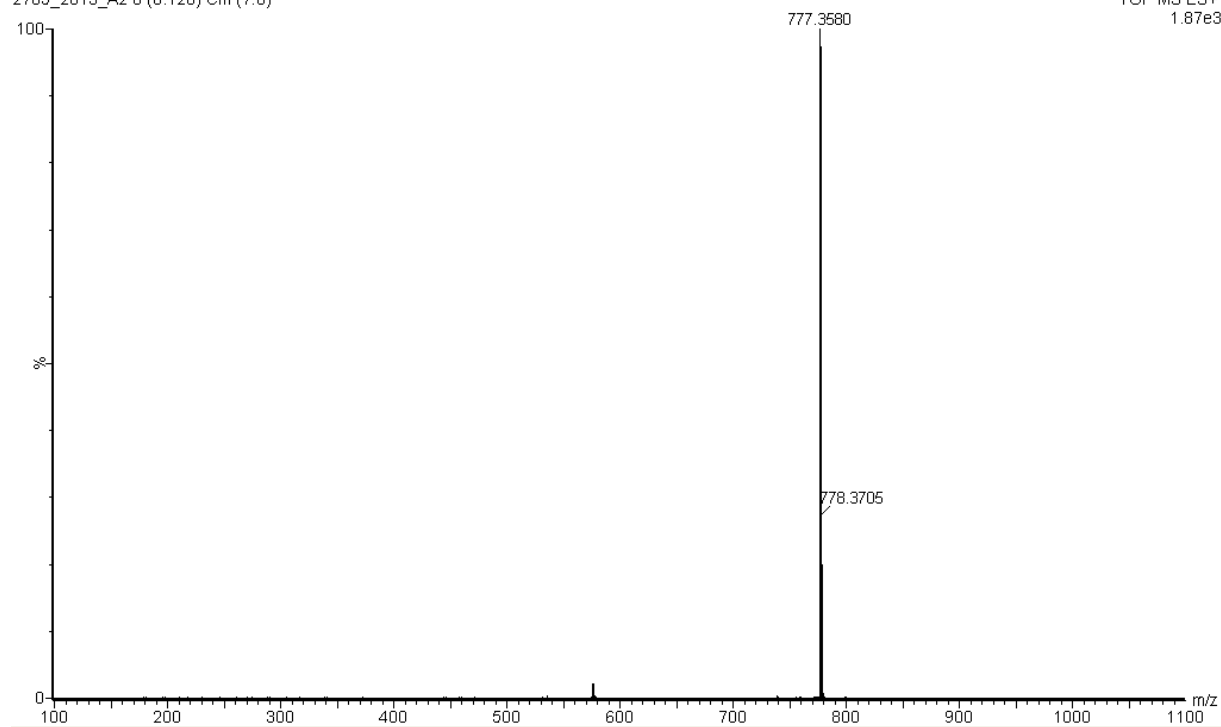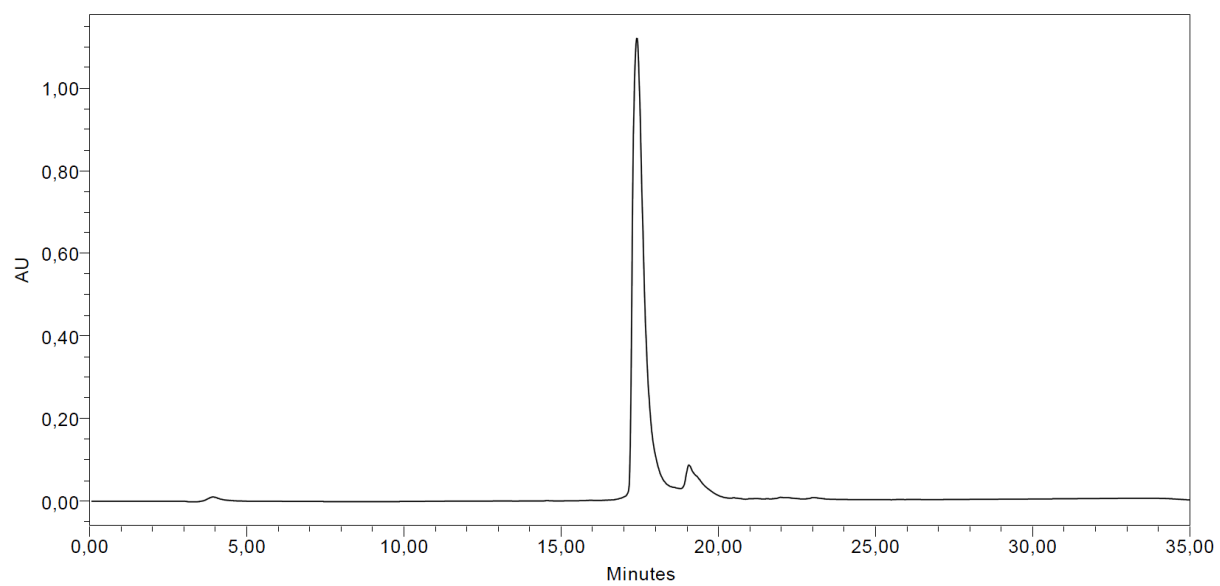

# MPP10

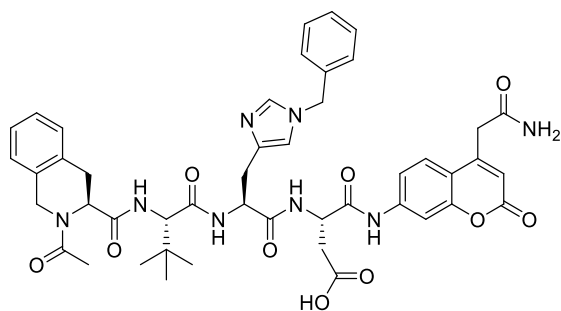

3482\_2013\_A1 101 (1.706)

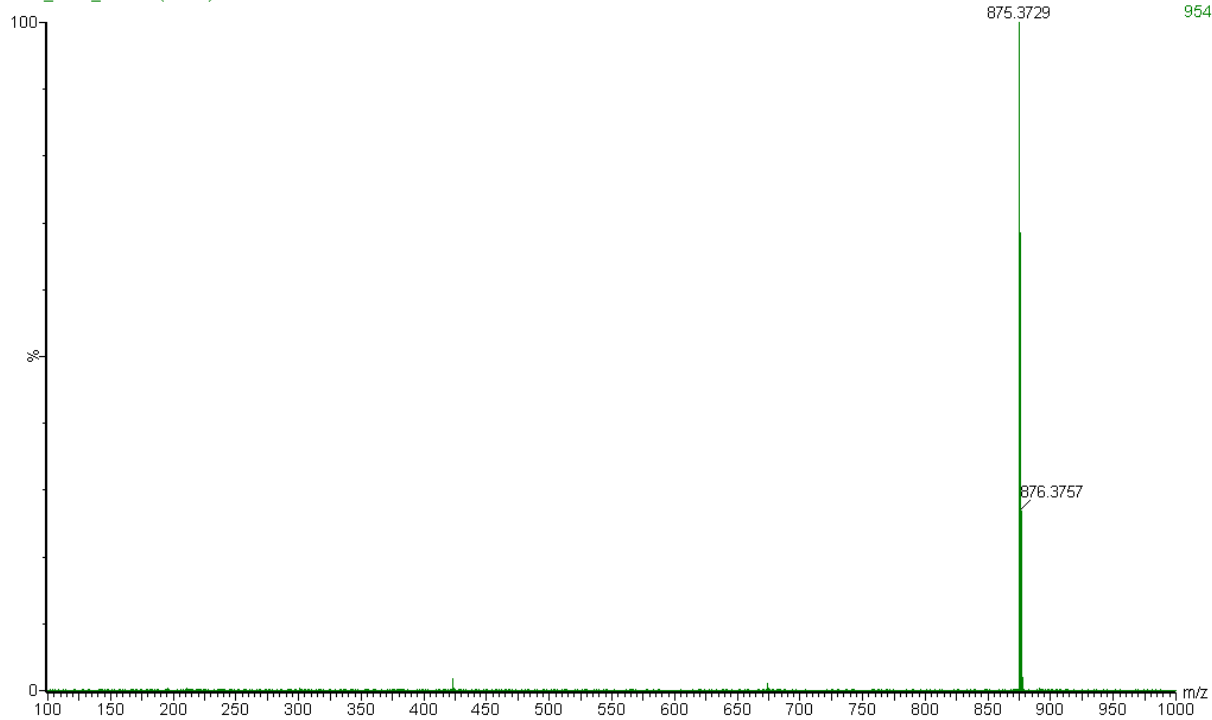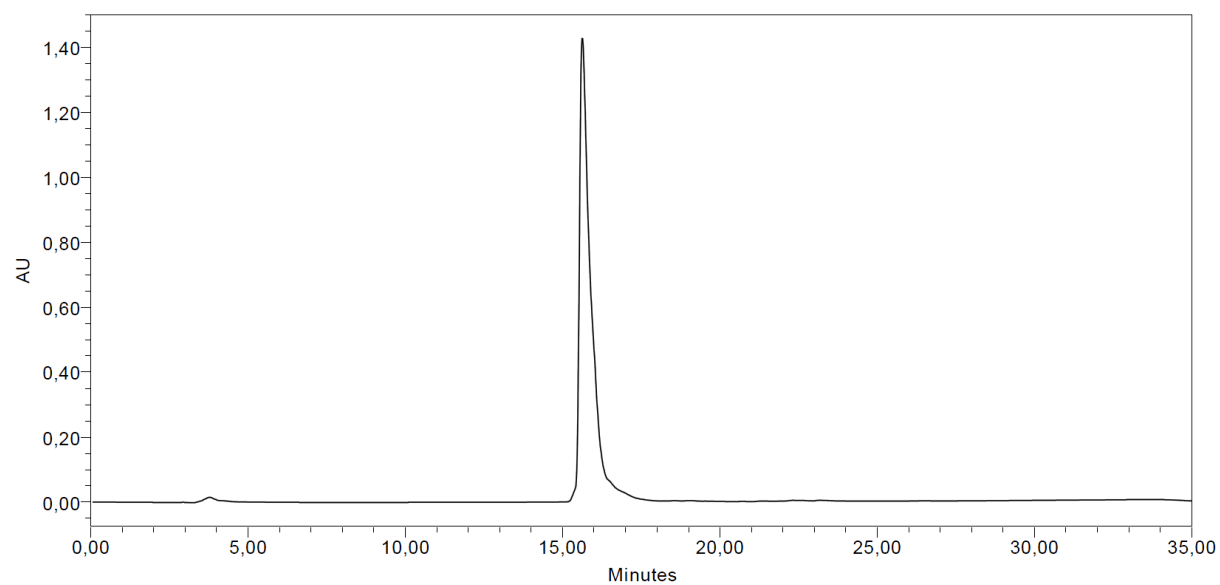

MPP12

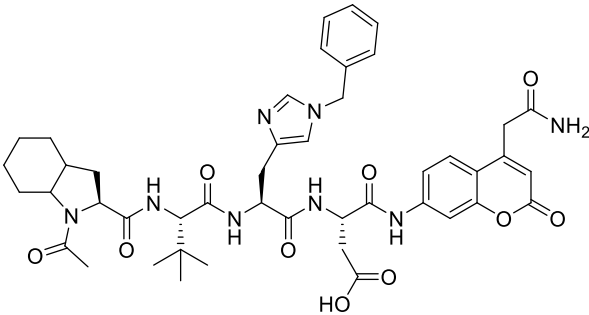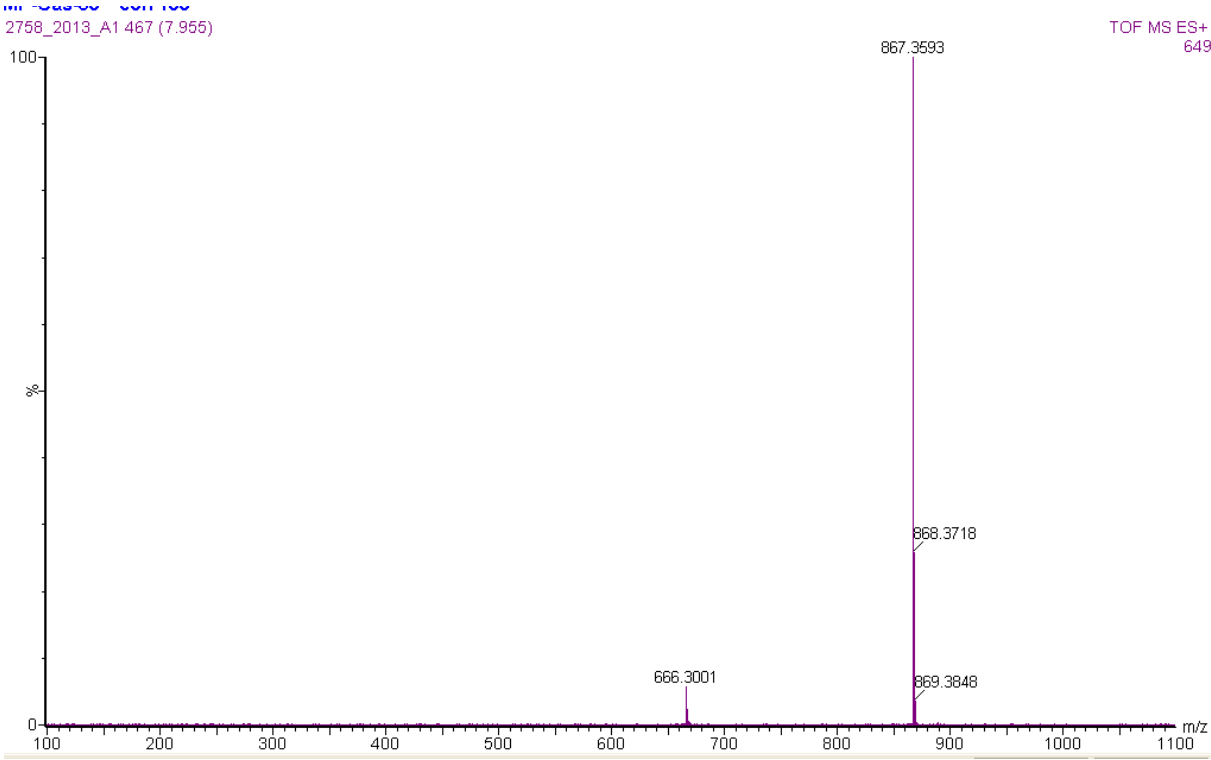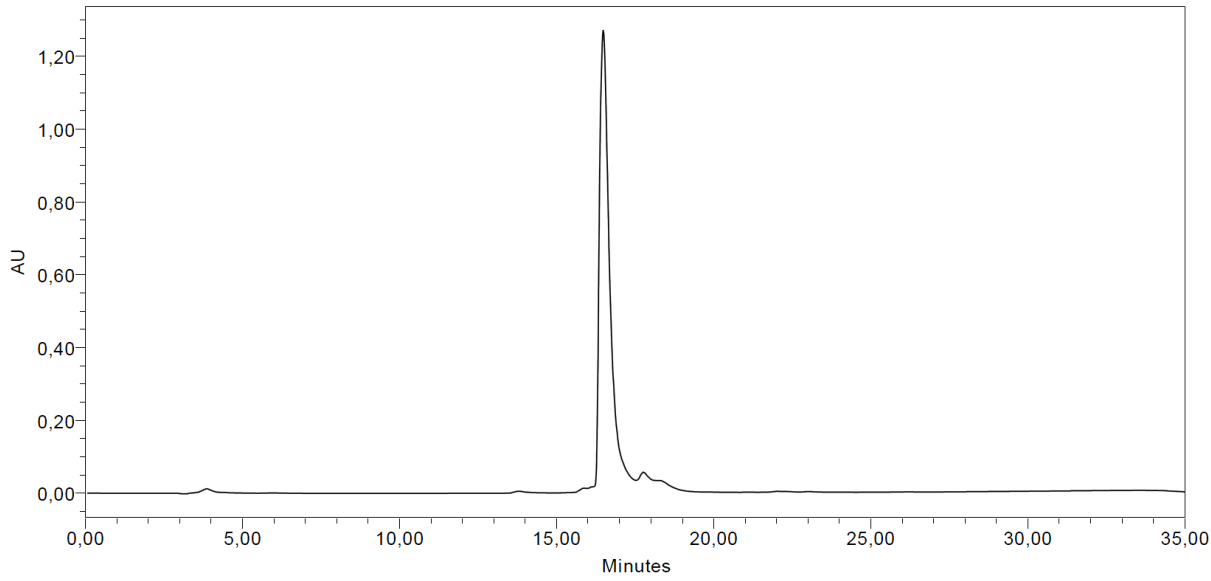



# MPP17

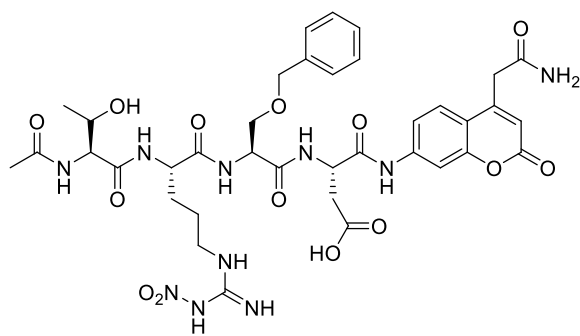

3483\_2013\_A2 44 (0.734) Cm (44:49)

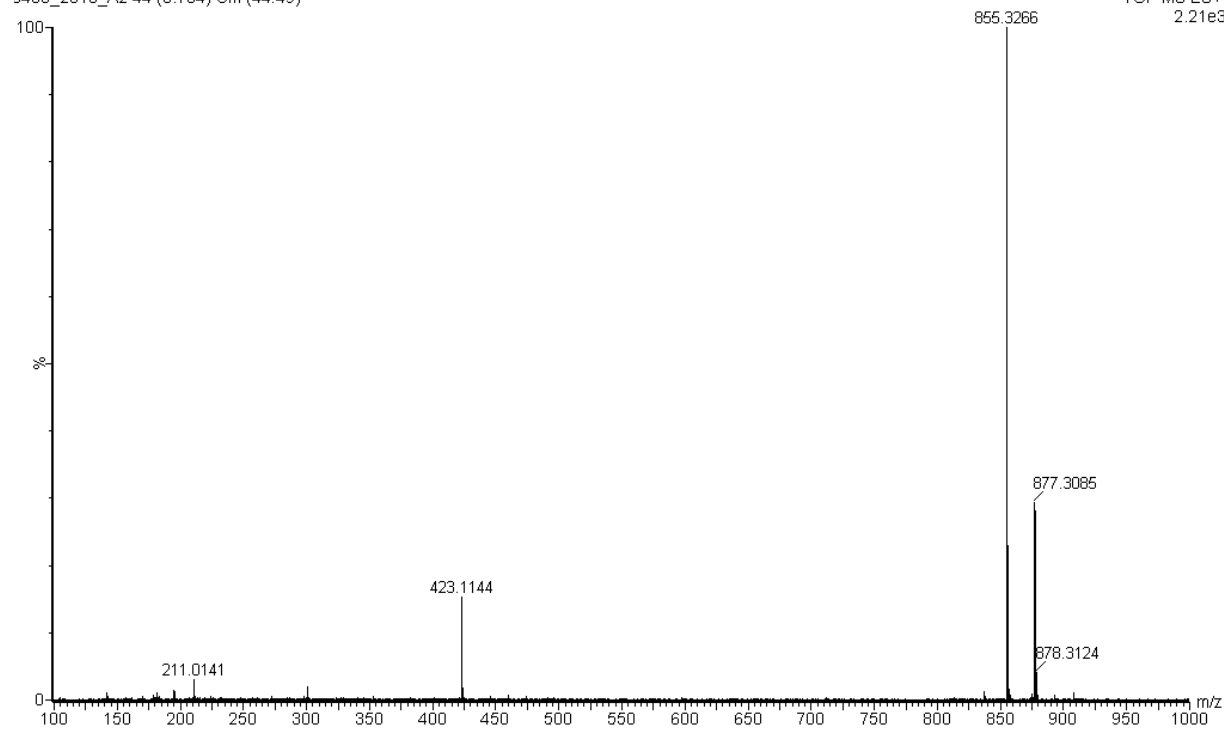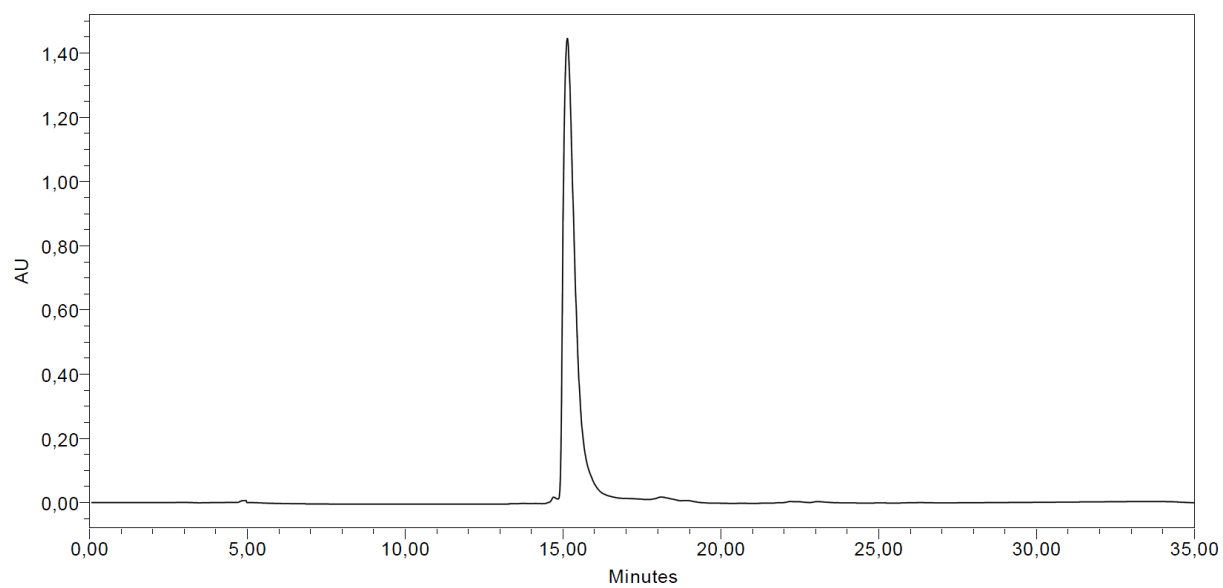

MPP21

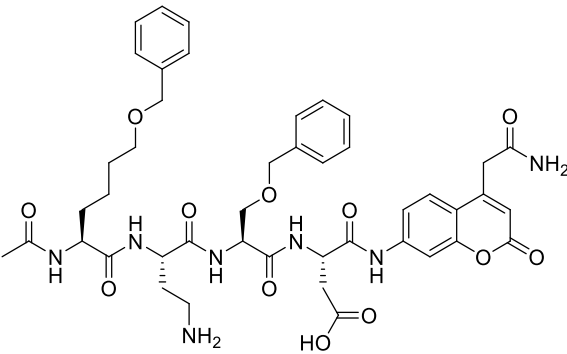

3484\_2013\_A1 64 (1.075) Cm (64:68)

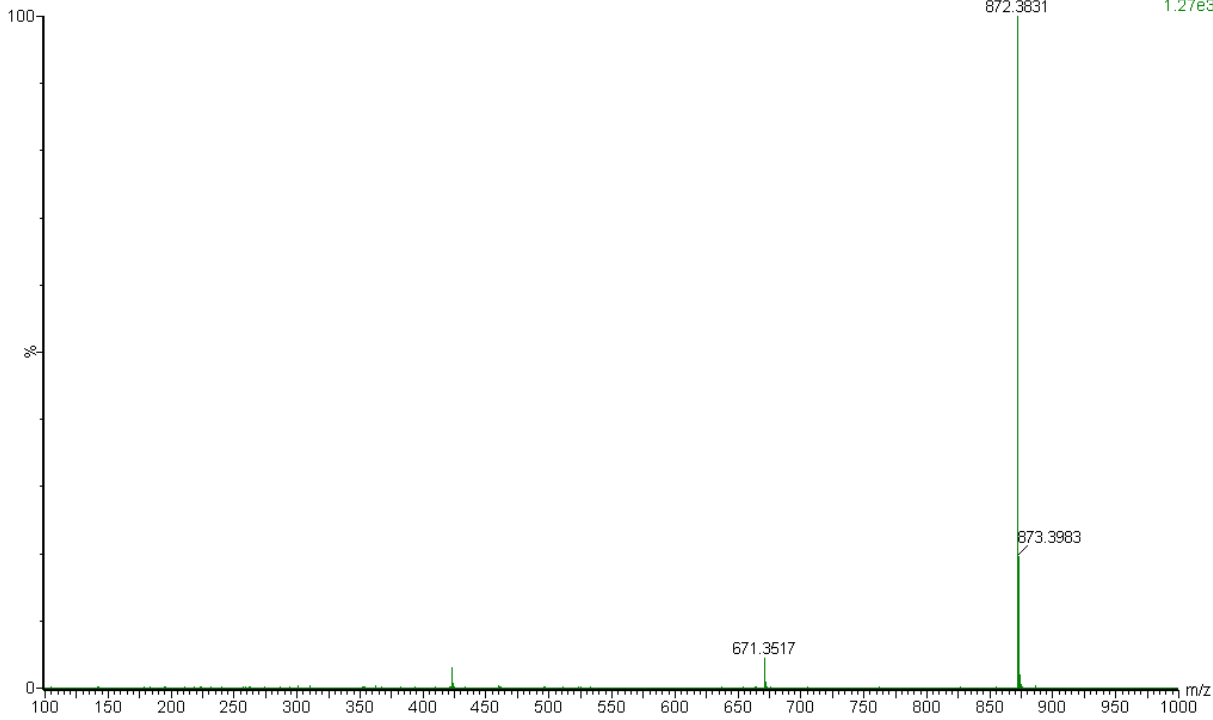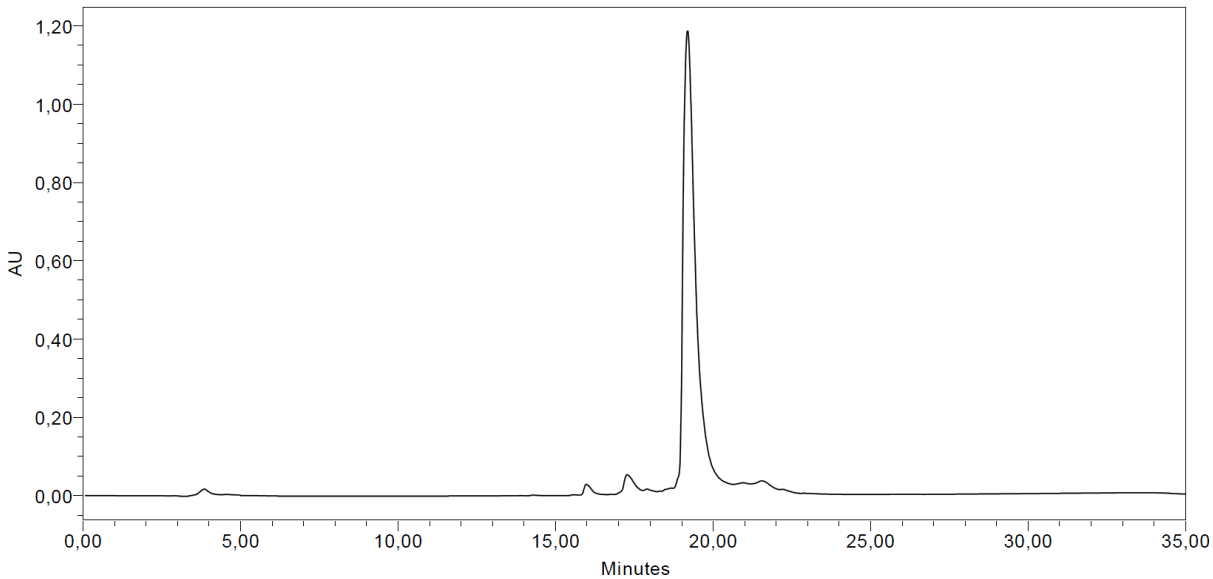



MPP28

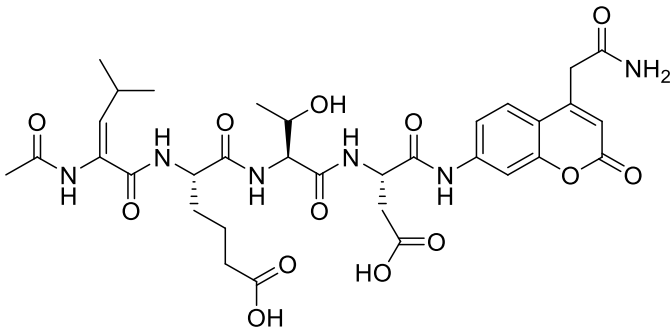

2759\_2013\_A2 15 (0.239) Cm (10:15)

TOF MS ES+  
1.69e3

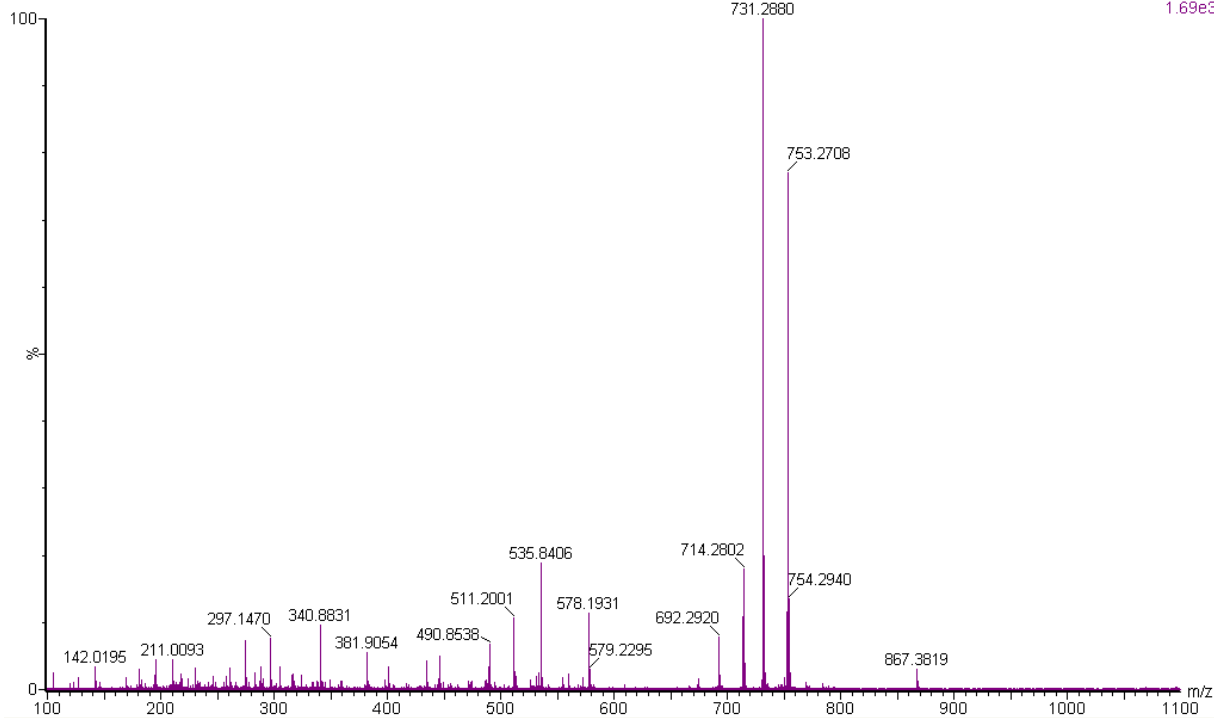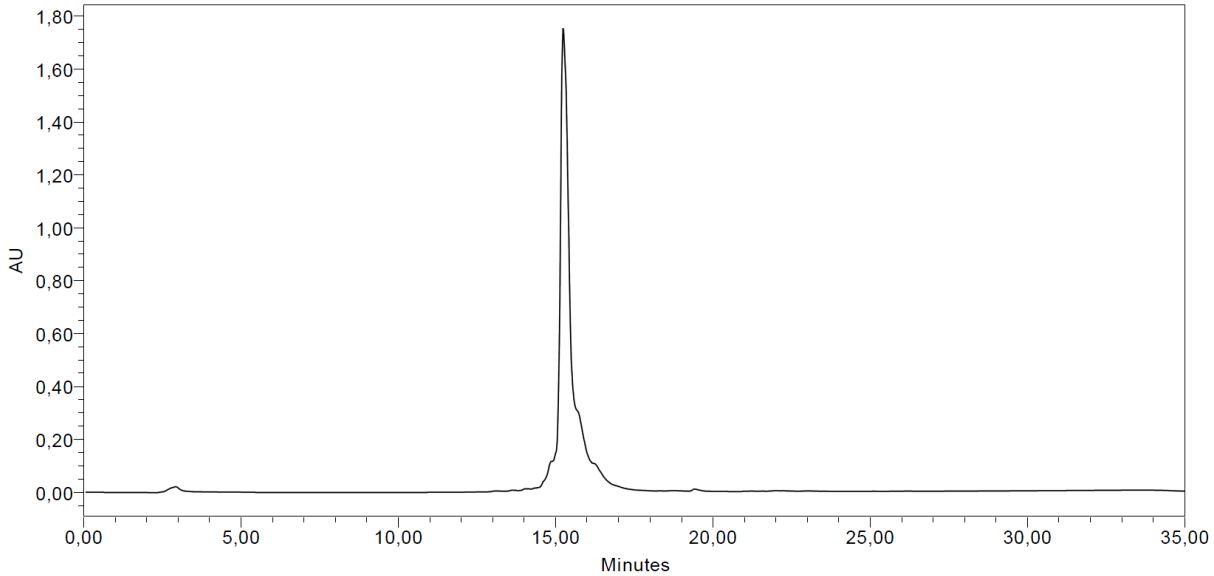

# MPP30

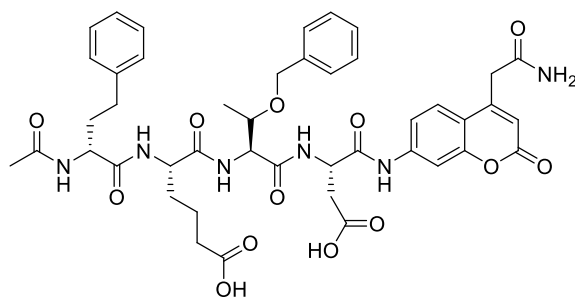

3486\_2013\_A3 42 (0.700) Cm (42:45)

TOF MS ES+  
1.43e3

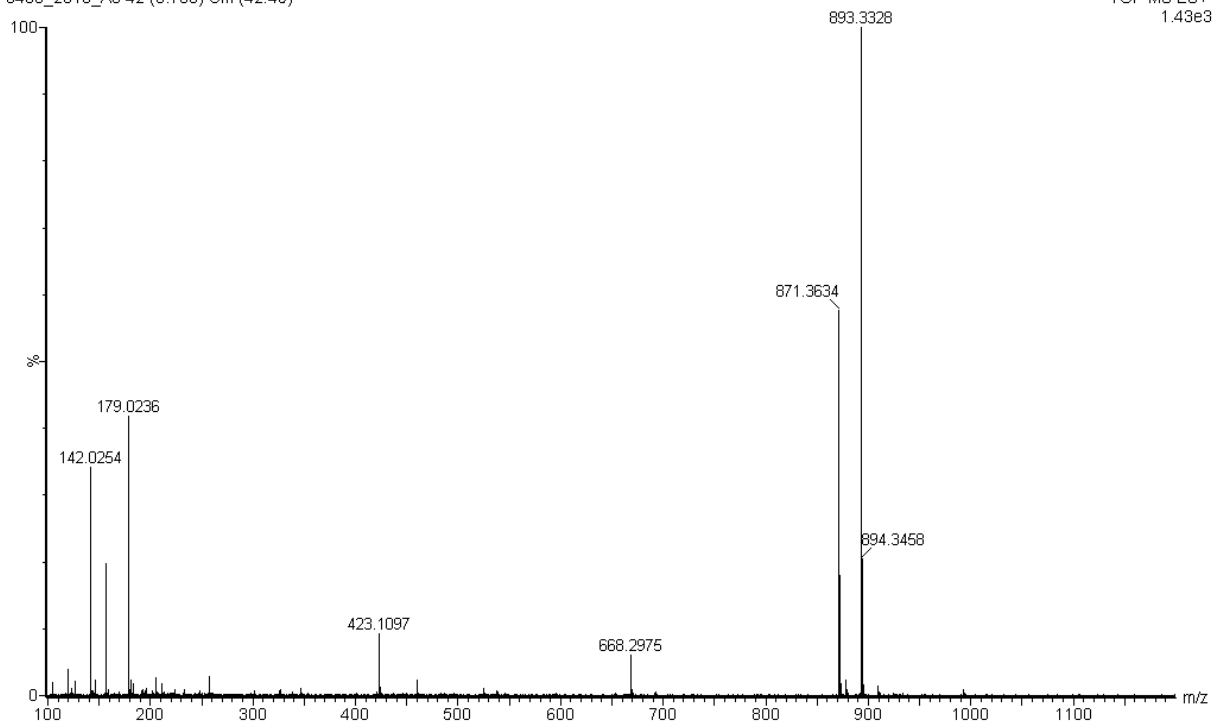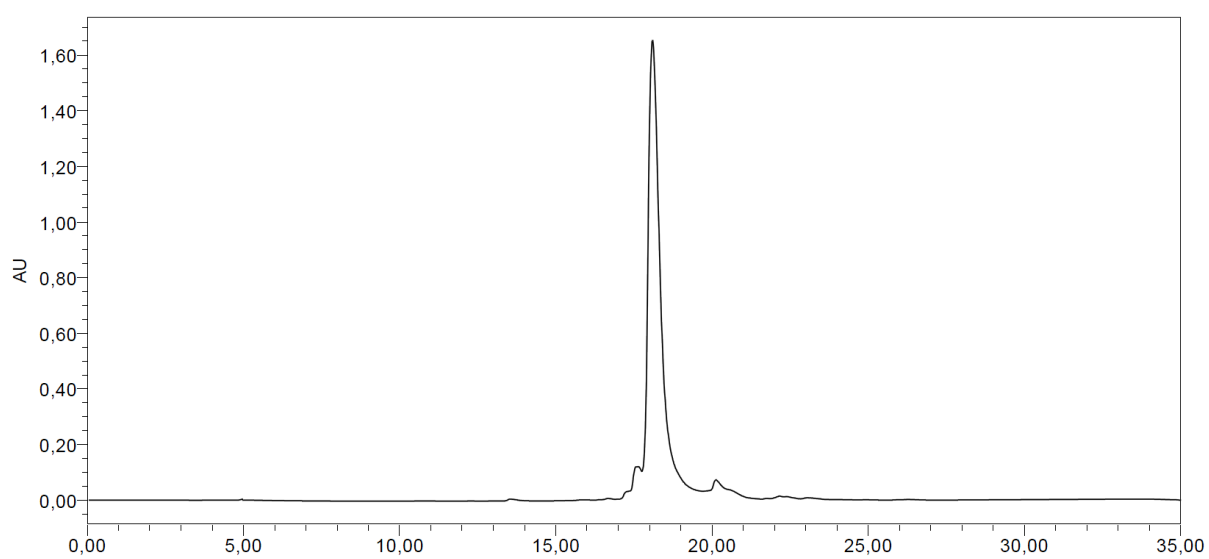

# MPP36

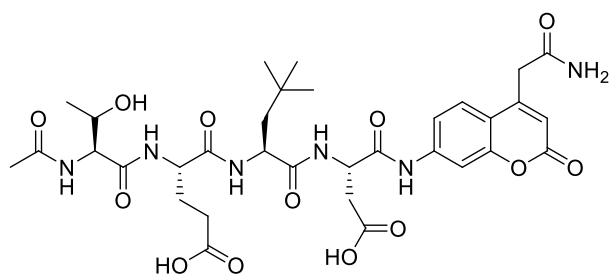

3487\_2013\_A2 10 (0.153) Cm (10:21)

TOF MS ES+  
8.48e3

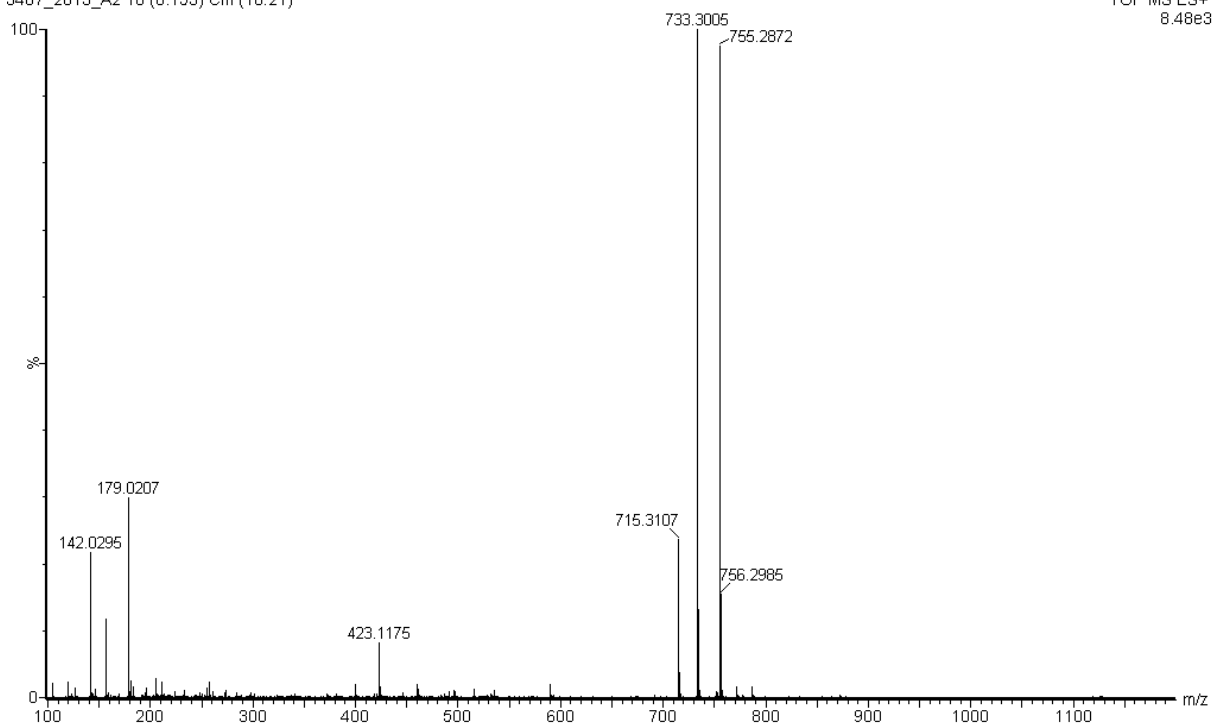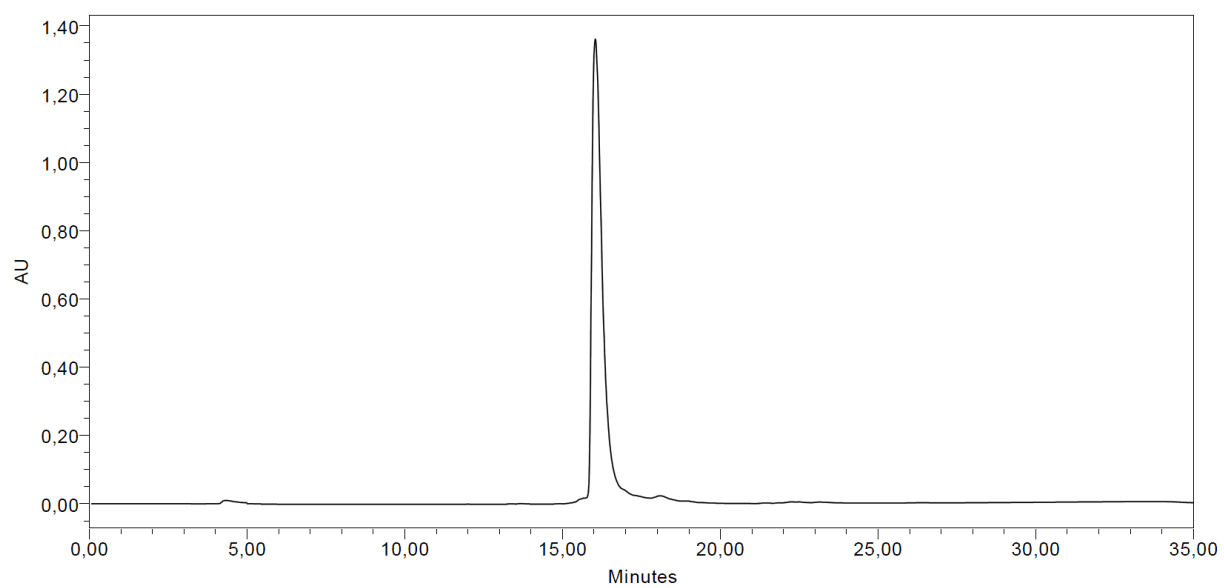

MPP38

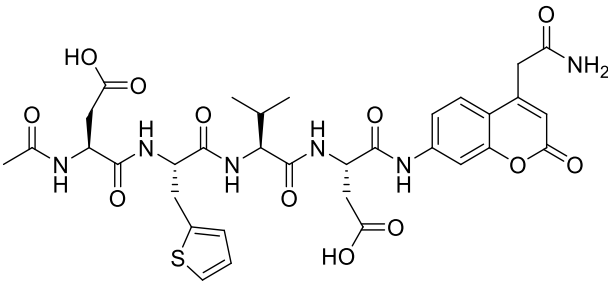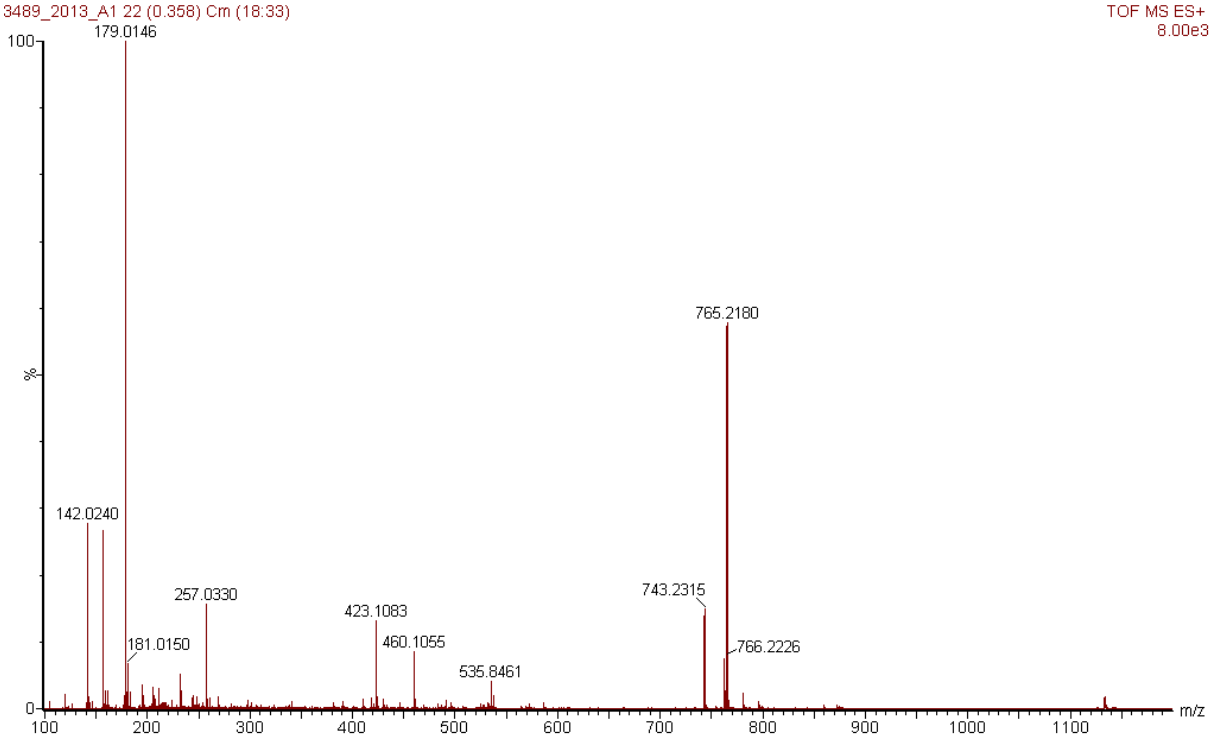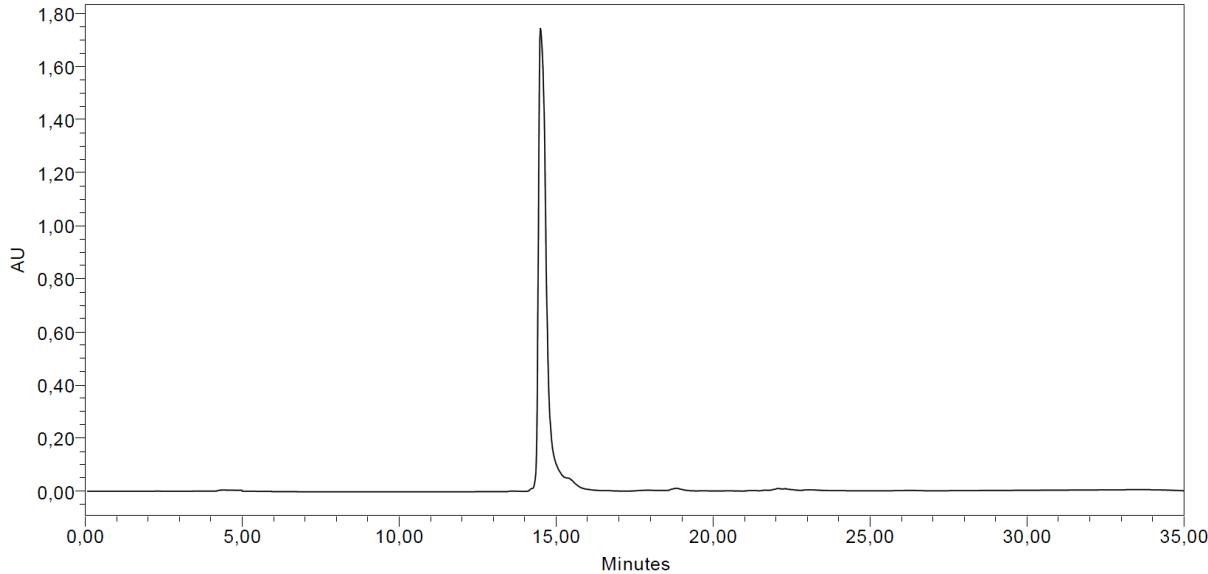





MPP40

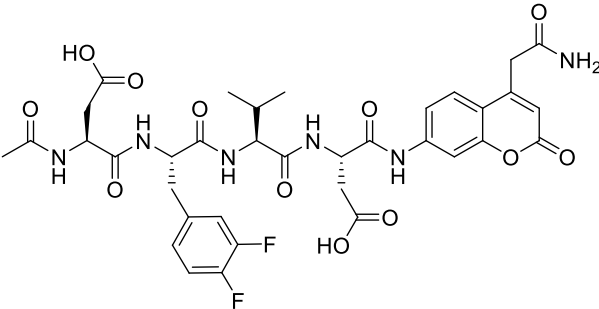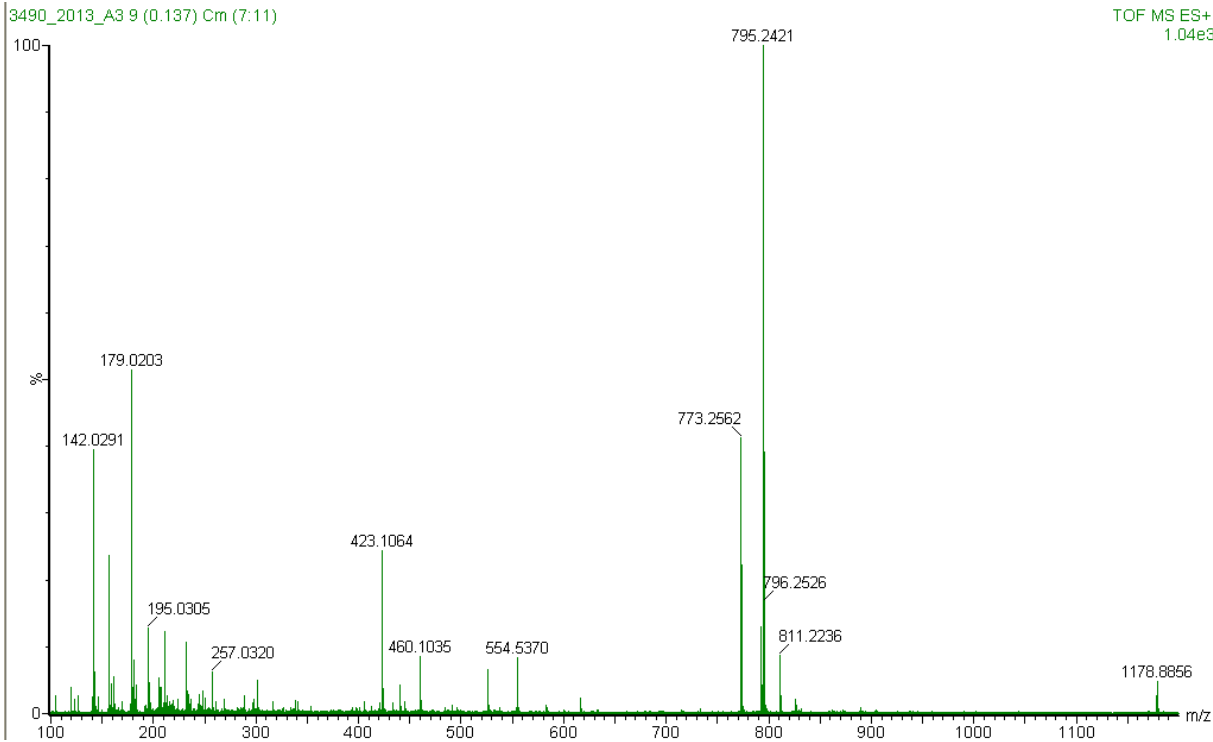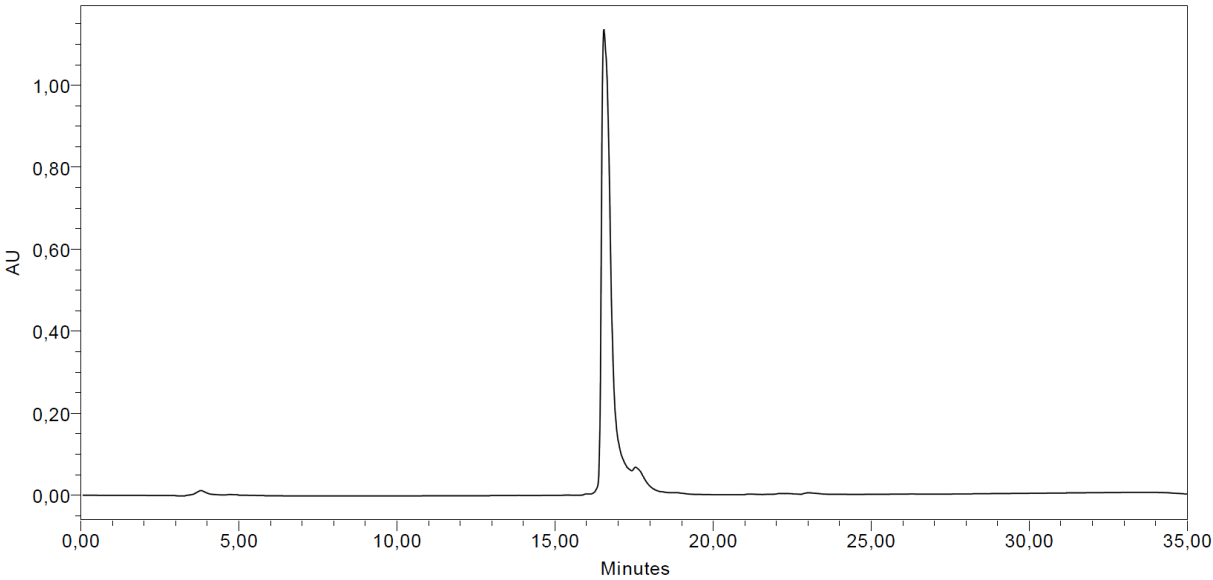

MPP41

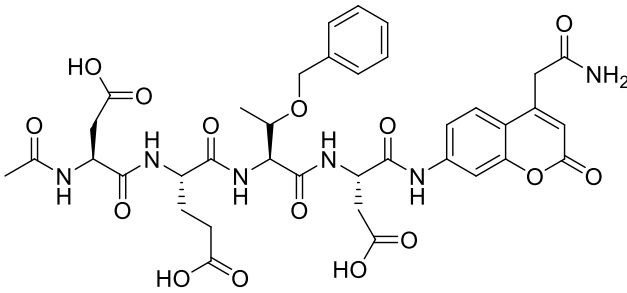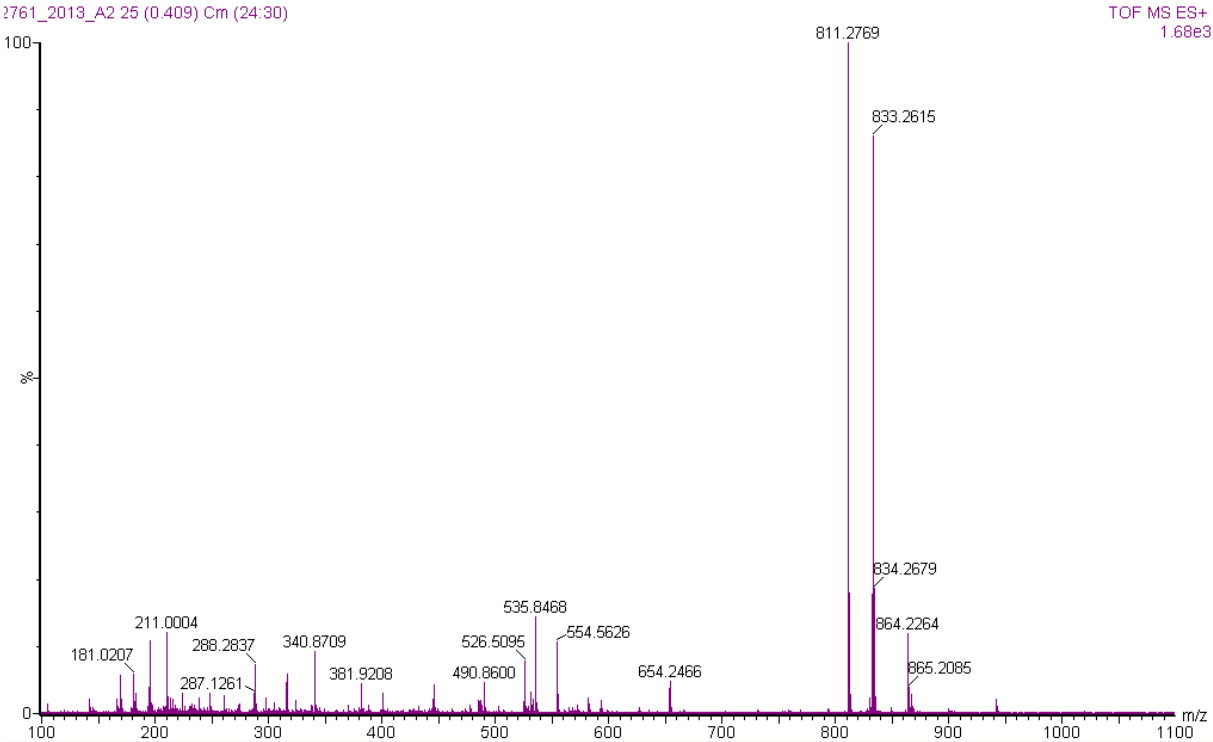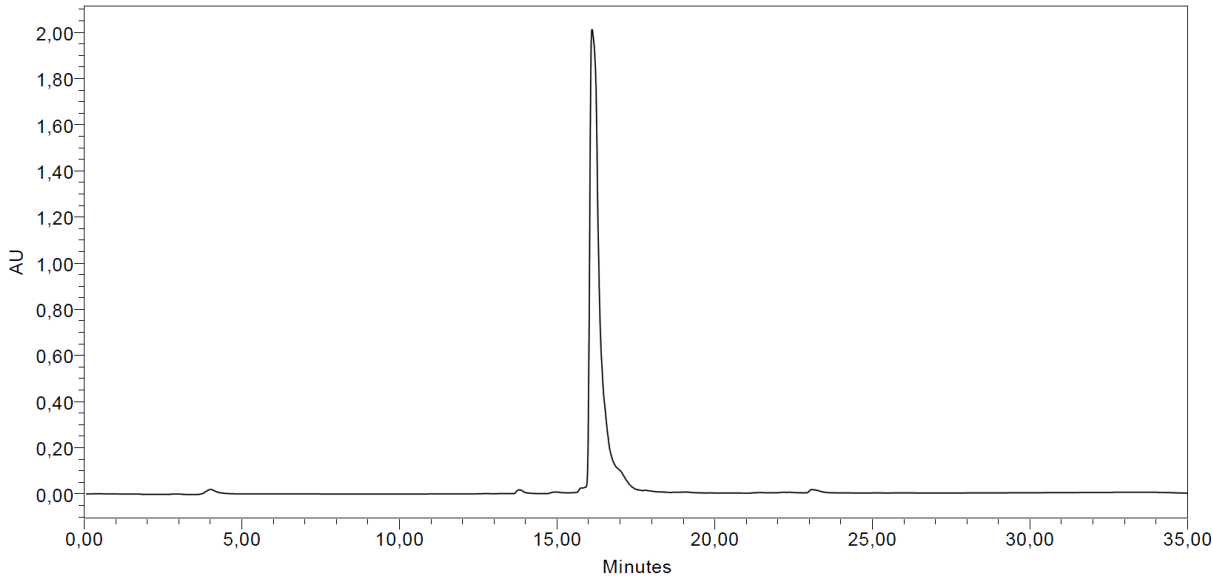

MPP42

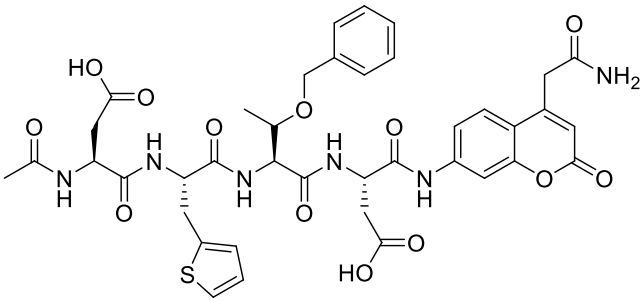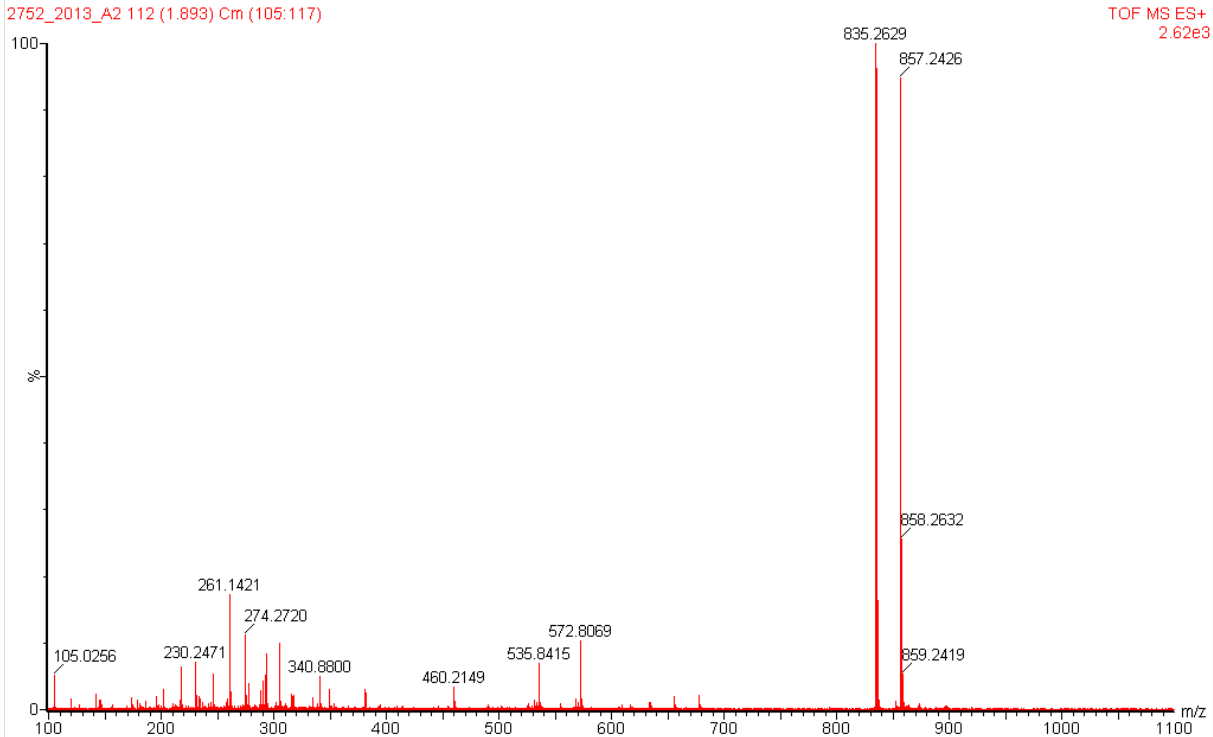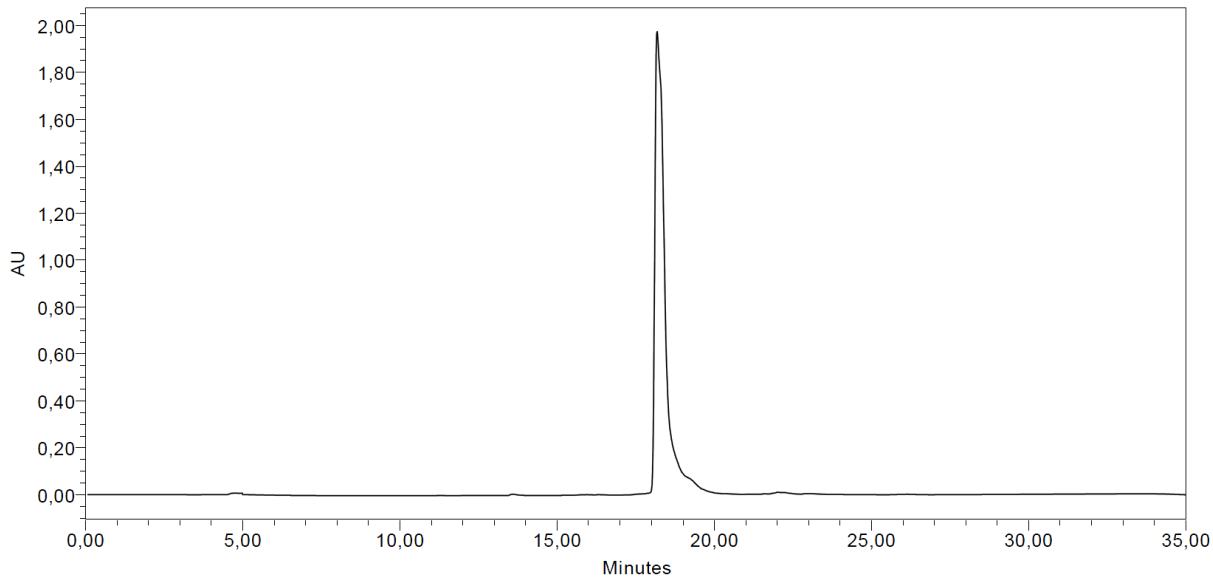

MPP43

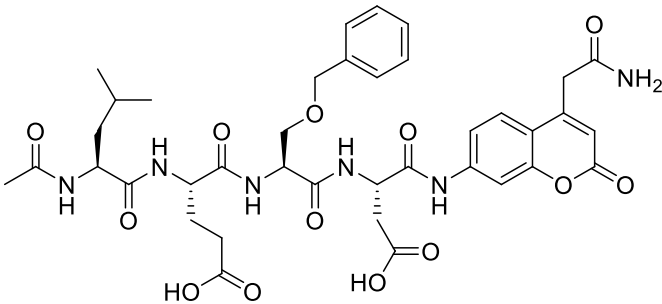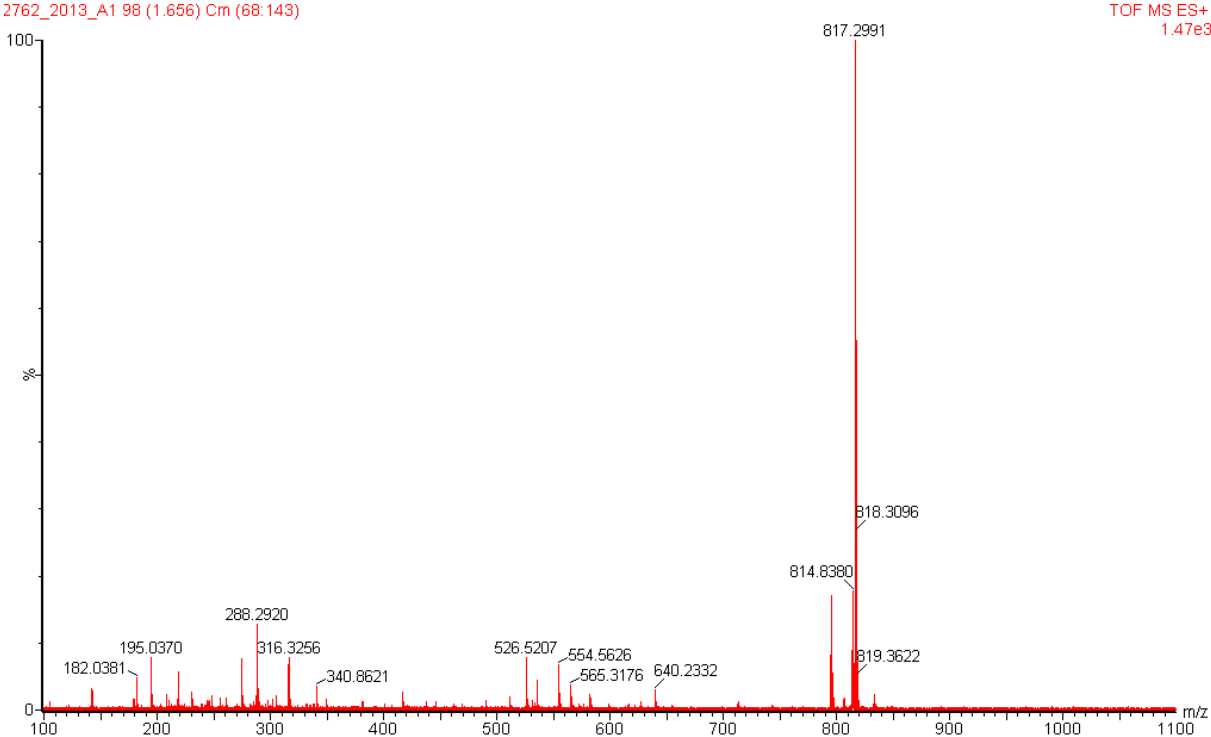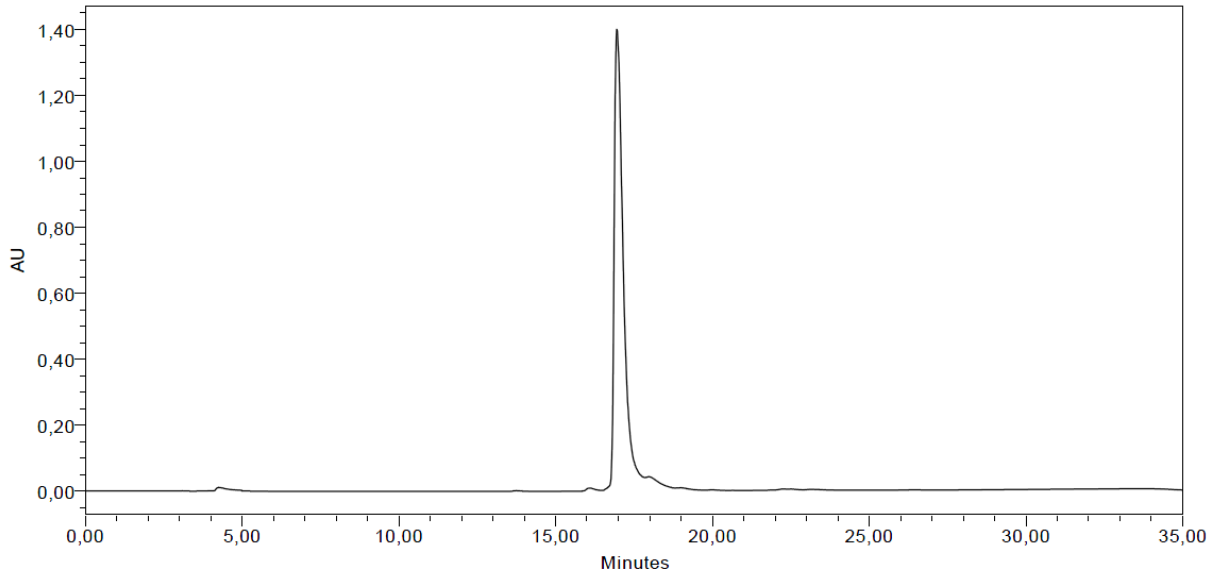

MPP45

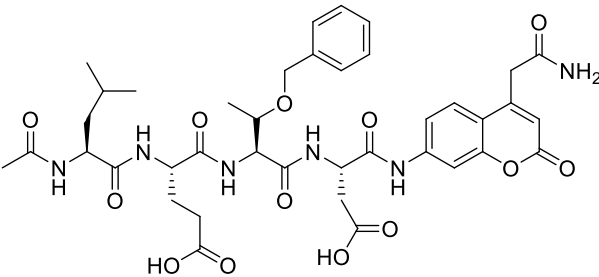

3491\_2013\_A1 71 (1.194) Cm (69.71)

TOF MS ES+  
1.02e3

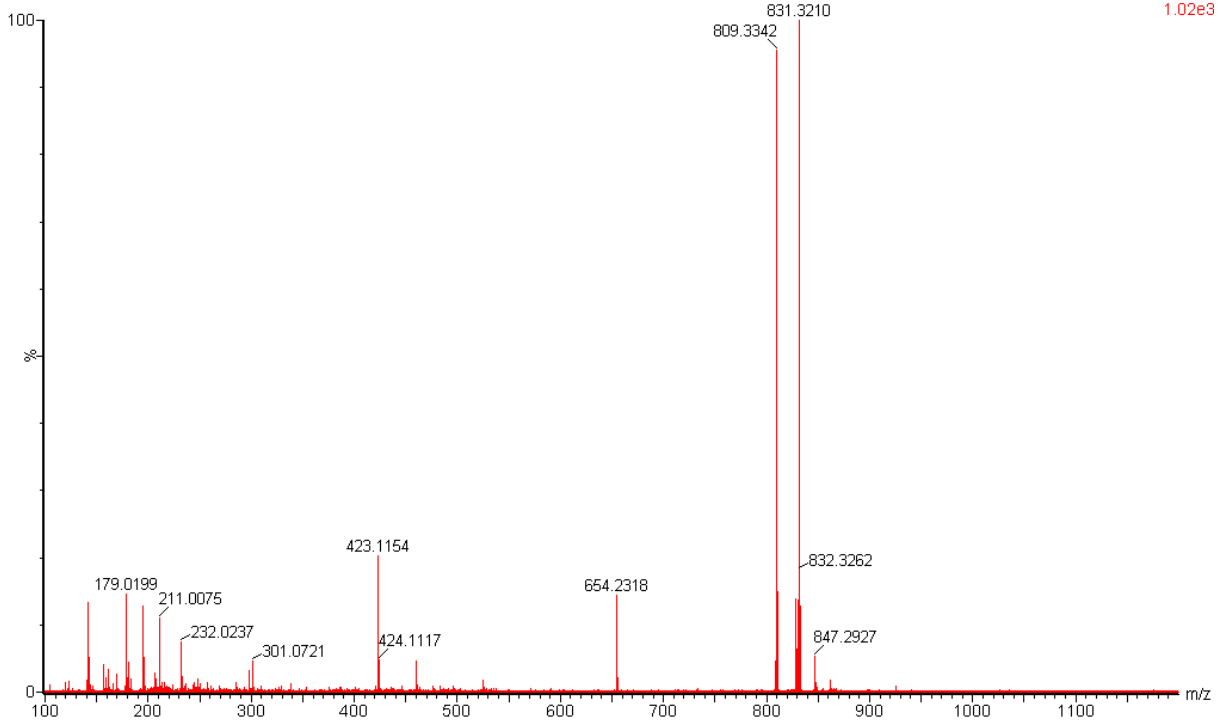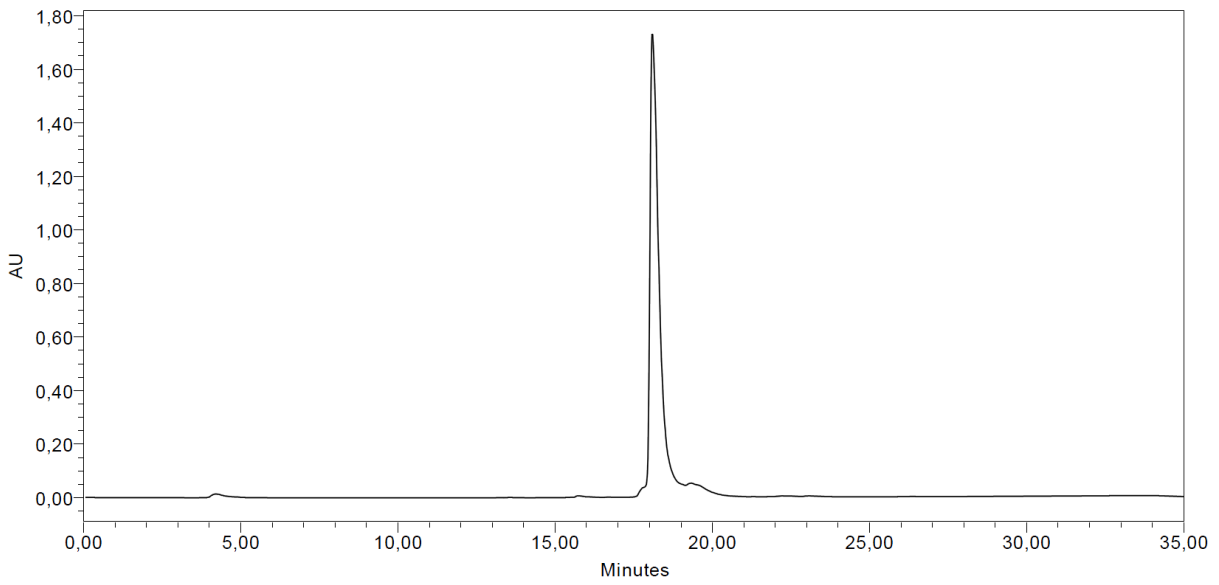

MPP46

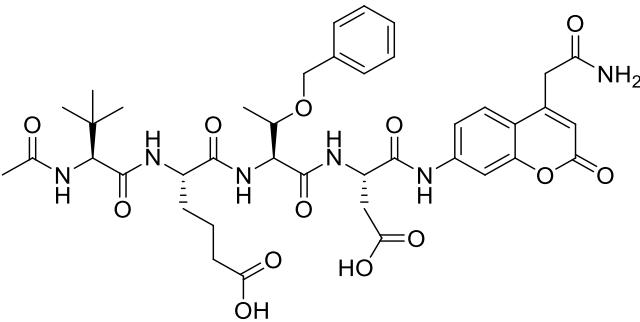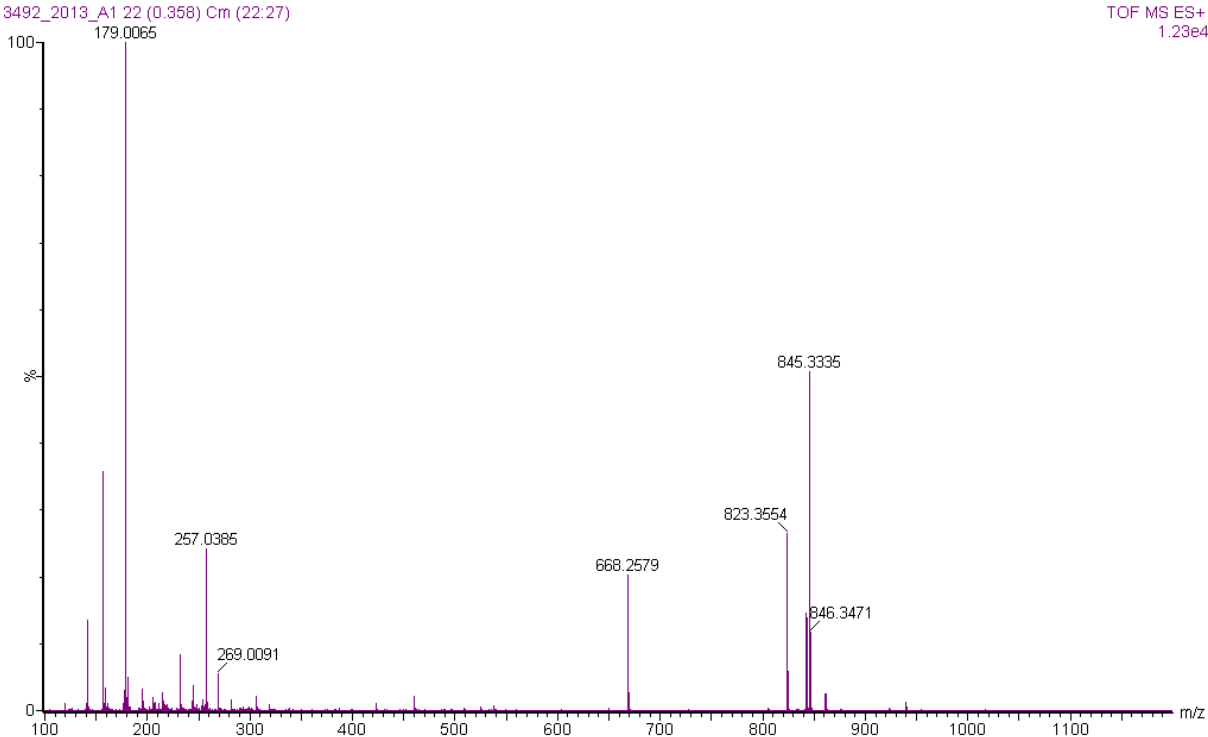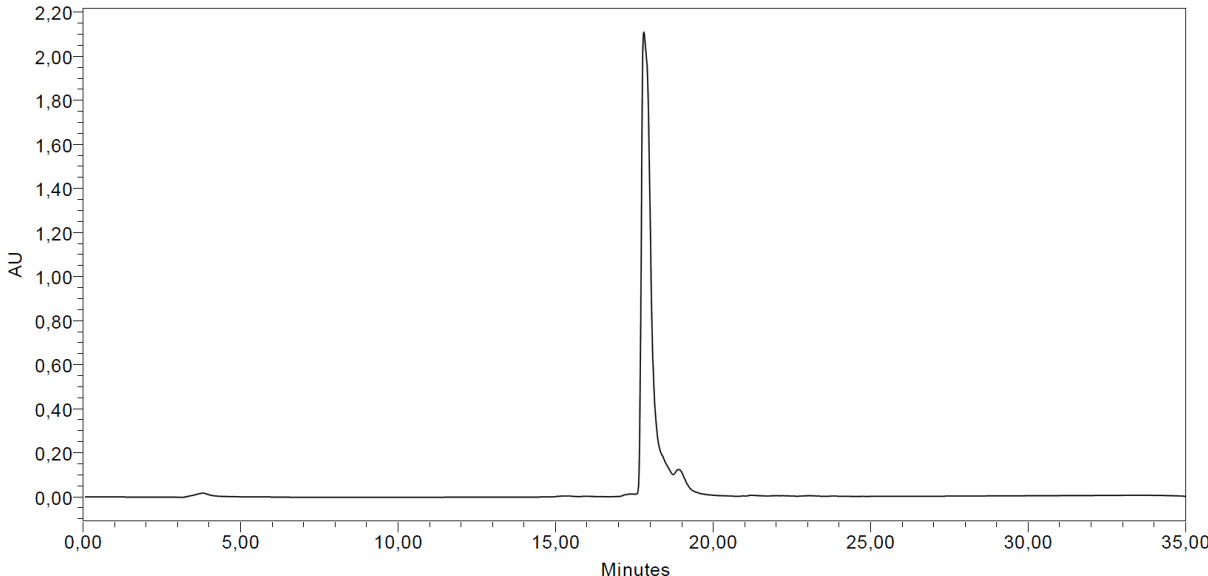

# MPP47

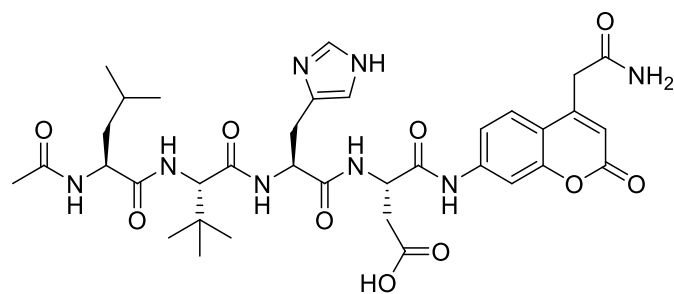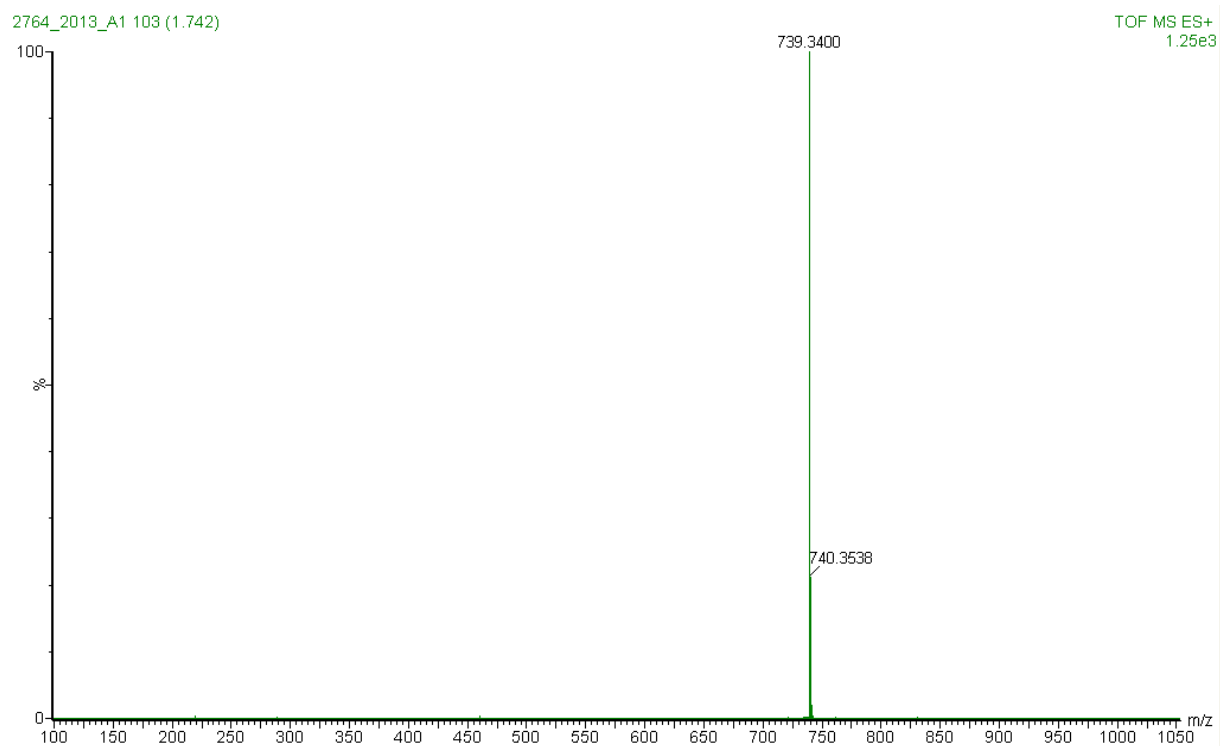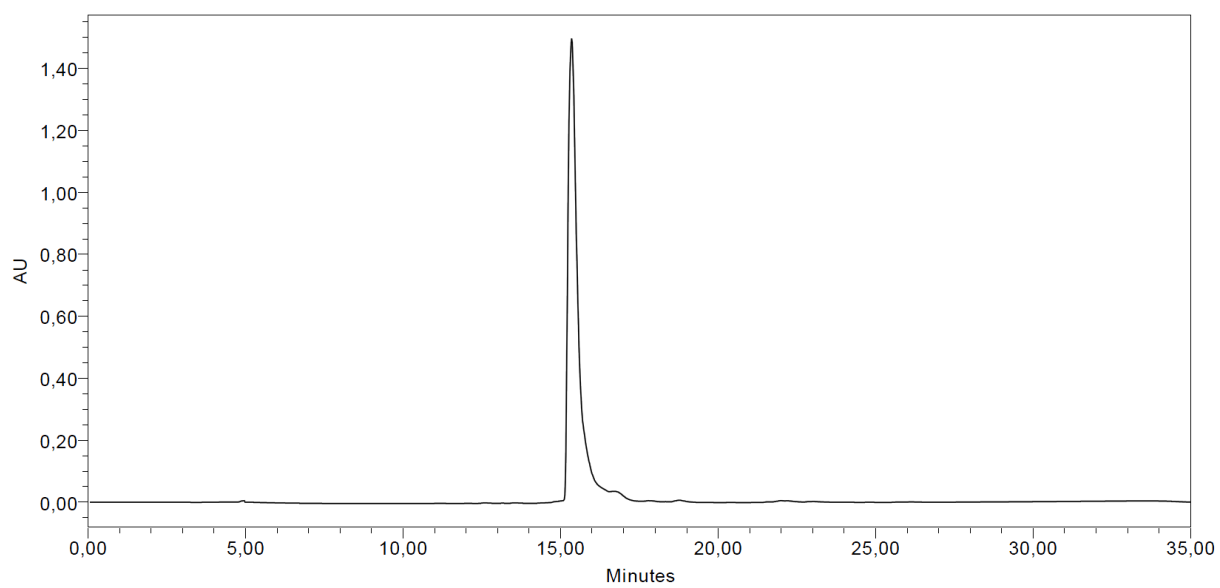

# MPP48

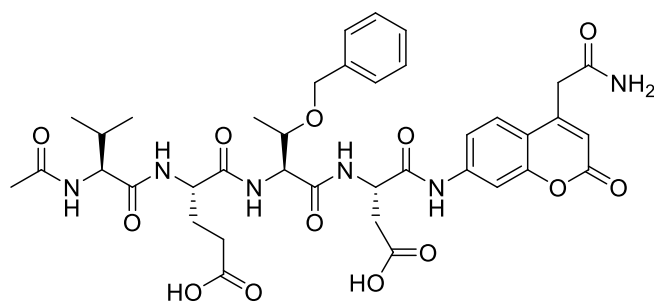

3493\_2013\_A2 10 (0.154) Cm (7:11)

TOF MS ES+  
3.23e3

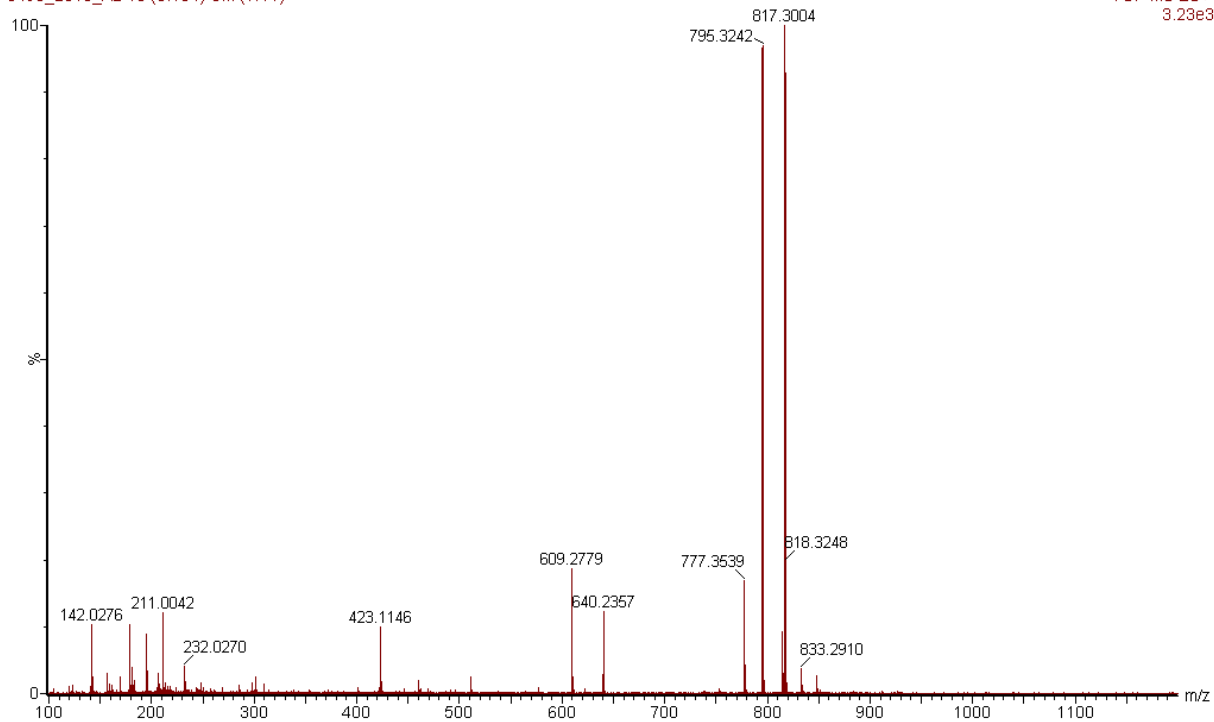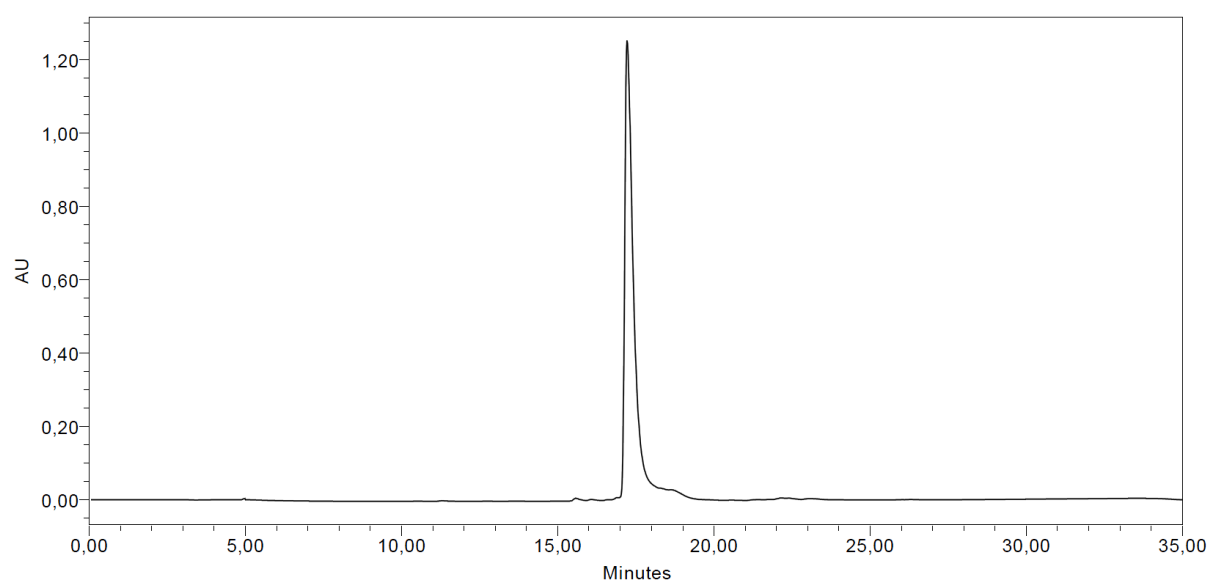



# MPP49

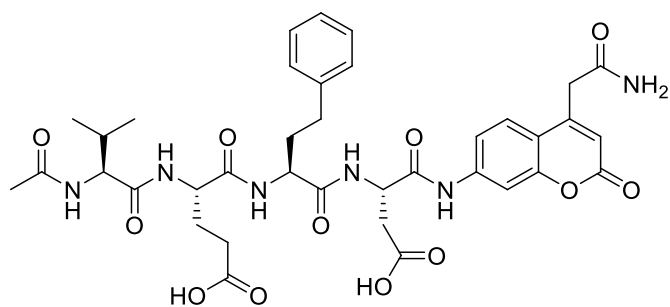

3494\_2013\_A3 10 (0.153) Cm (5:11)

TOF MS ES+  
2.92e3

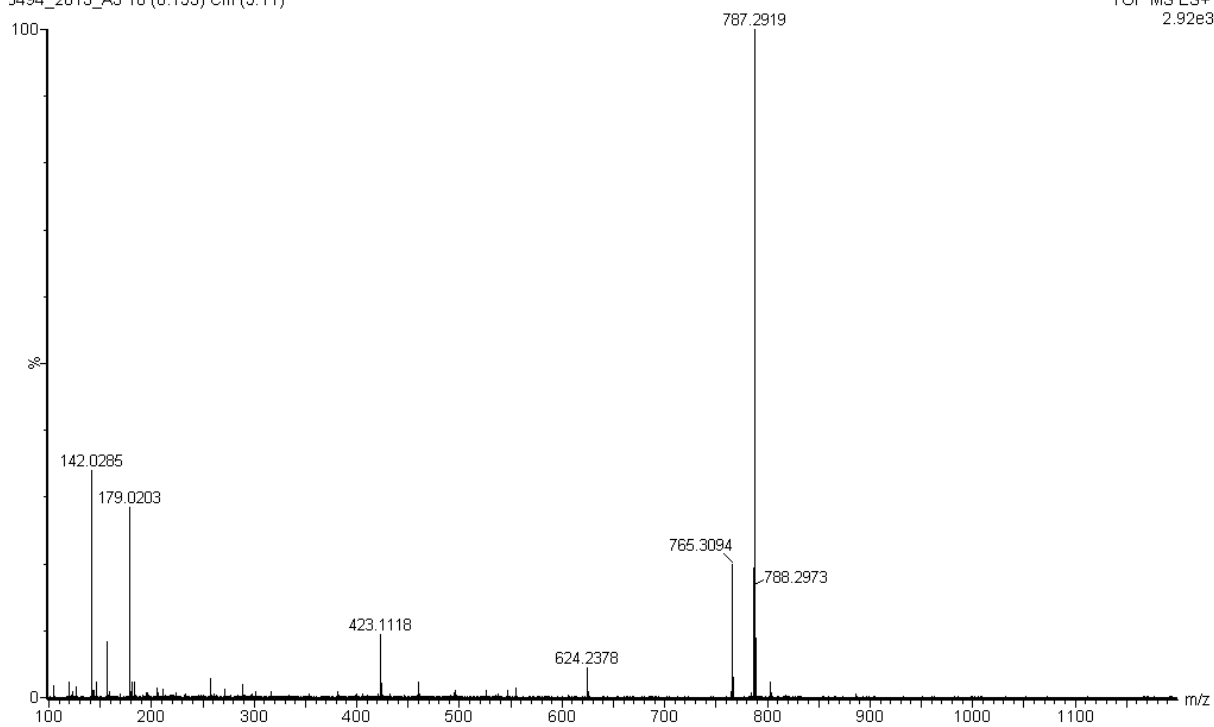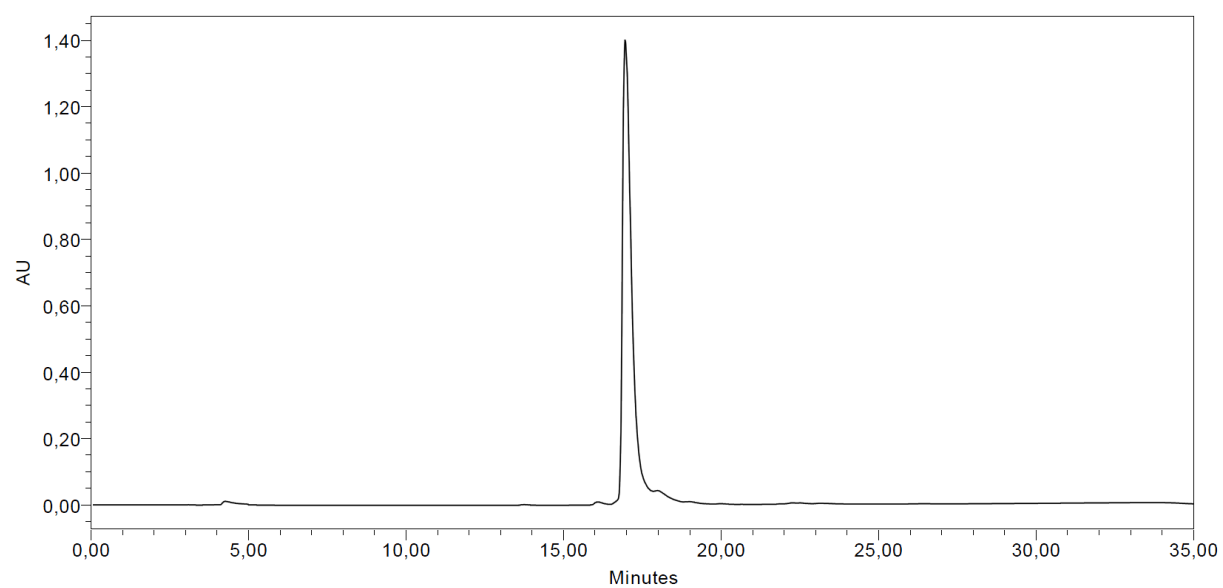

MPP50

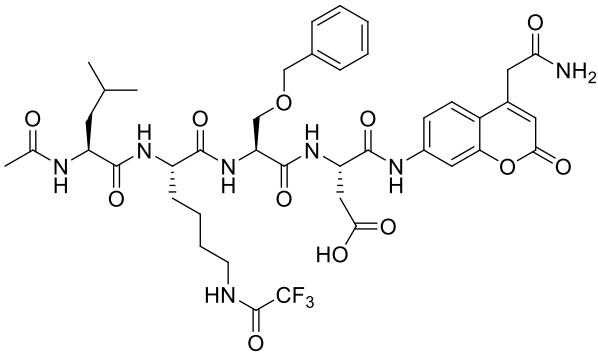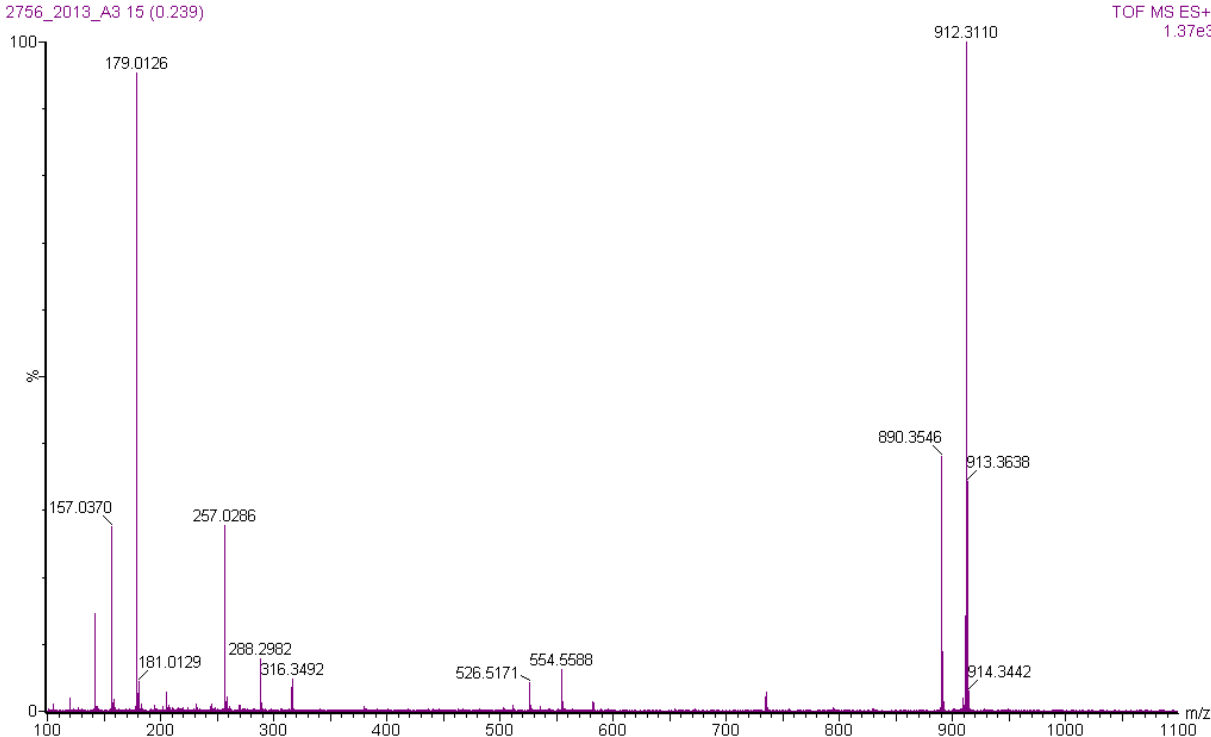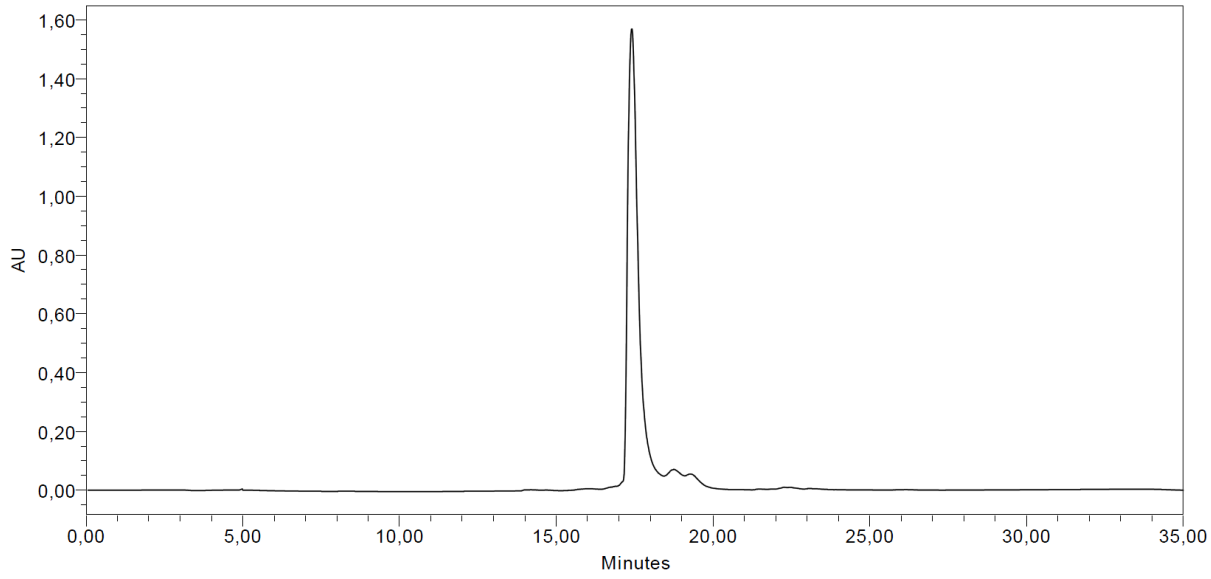

MPP51

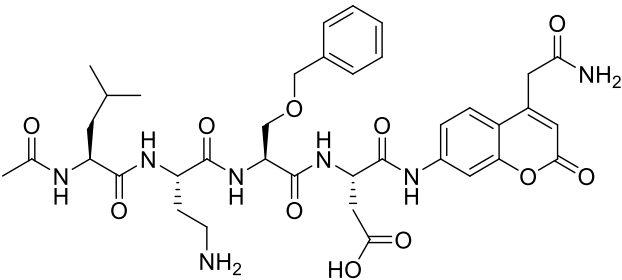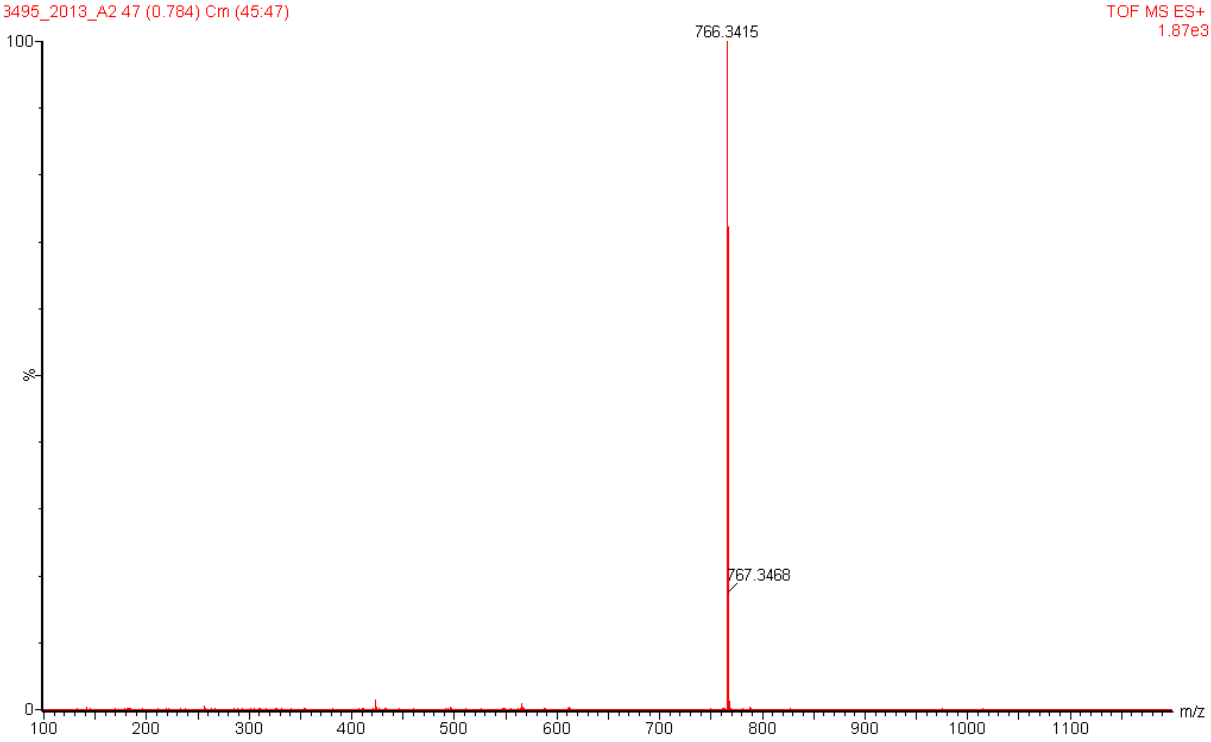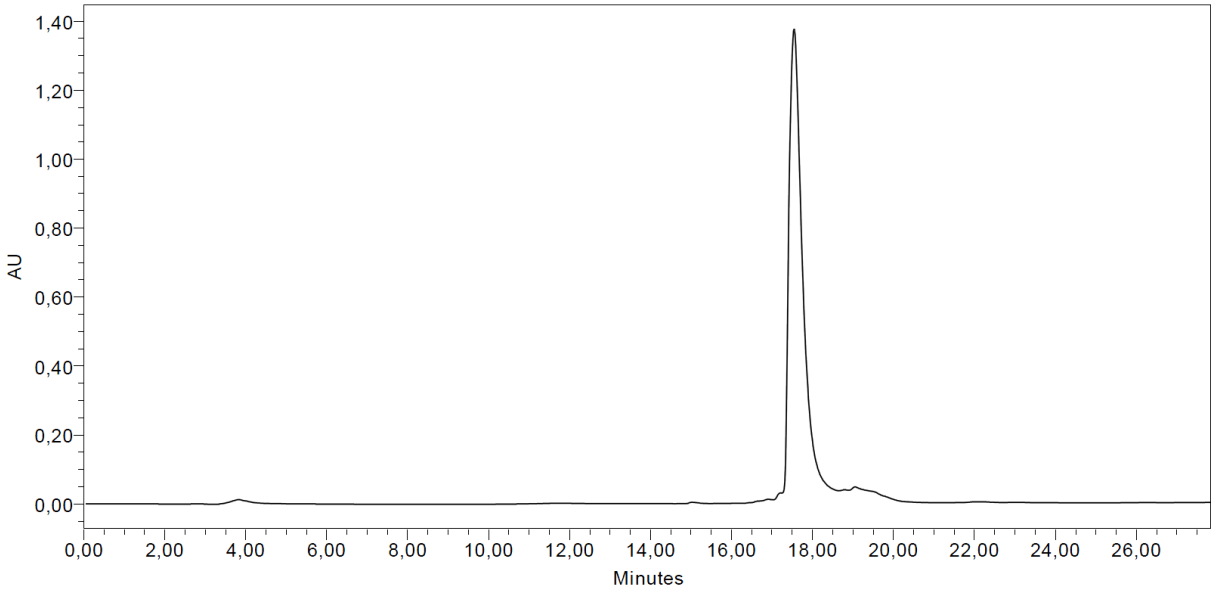

MPP52

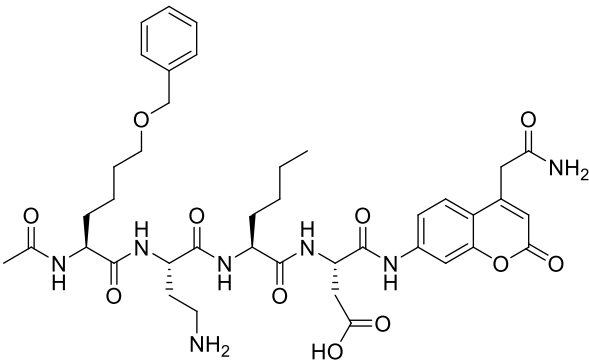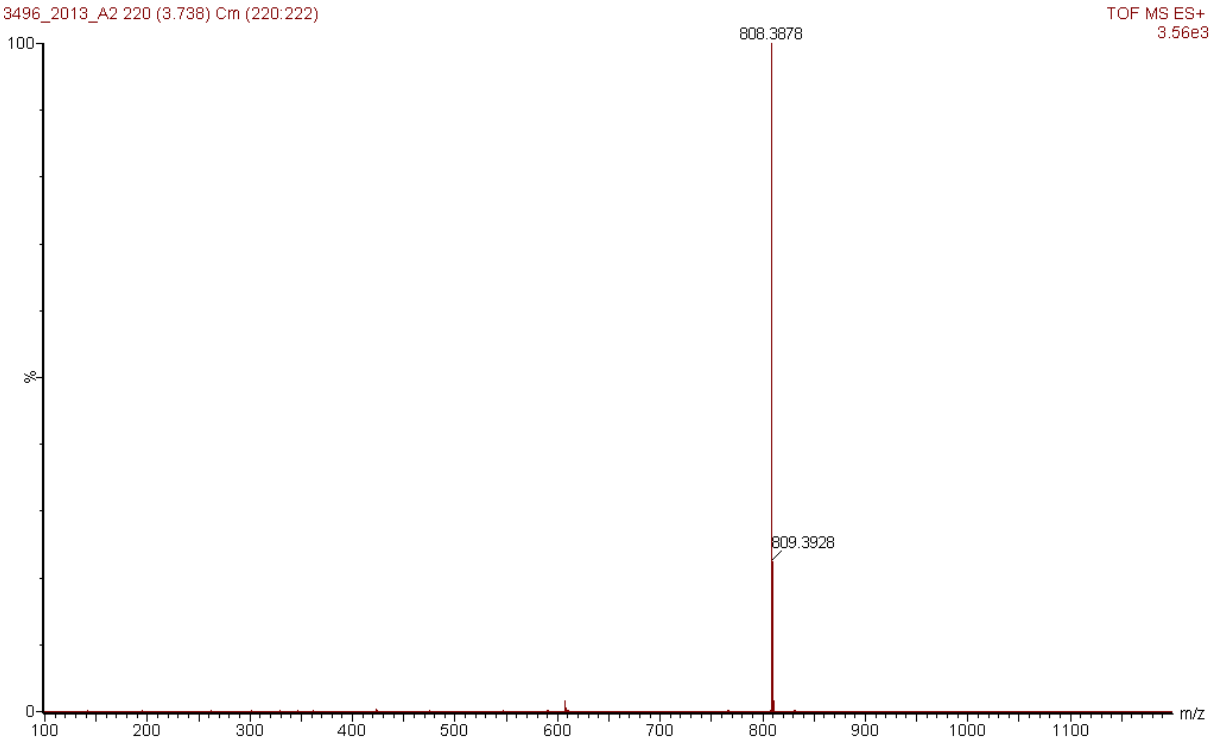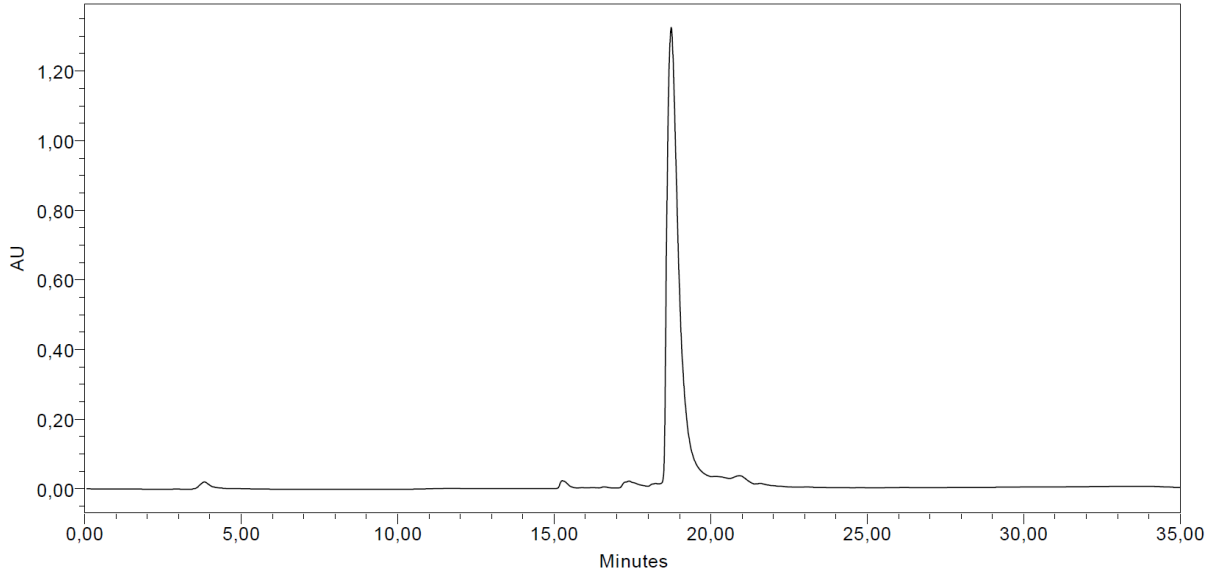

Supplement: cdd201464x1.pdf [file cdd201464x1.pdf]
